# Supplementary material for: Correction: Serologically Defined Variations in Malaria Endemicity in Pará State, Brazil
Source: PLoS One. 2021 Nov 19;16(11):e0260513. doi: 10.1371/journal.pone.0260513 (PMC8604311; doi:10.1371/journal.pone.0260513)
Supplement: S1 Dataset — Epidemiological and serological data set (Cunha et al. 2014, PLOS ONE). (XLSX) [file pone.0260513.s001.xlsx]

## Sheet: Cunha etal 2014PlosONE data set
number	sample	age	age_groups	sex	municipality	normhis	normgst	normpva	normpfm	normpfa		odhispvmsp	corrhispvmsp	normhispvmsp	odgstpvmsp	corrgstpvmsp	normgstpvmsp	odpvama	corrpvama	normpvama	odpfmsp	corrpfmsp	normpfmsp	odpfama	corrpfama	normpfama
1	23 ANA	12	2	0	1	.299	.29	.092	.015	-.002		1.03	.929	.299	.842	.749	.29	.268	.179	.092	.15	.044	.015	.115	-.005	-.002
2	24 ANA	10	1	0	1	.298	.242	.149	.006	.002		1026	.925	.298	.718	.625	.242	.378	.289	.149	.125	.019	.006	.124	.004	.002
3	25 ANA	40	4	1	1	.005	-.001	.294	.016	.005		.115	.014	.005	.092	-.001	-.001	.66	.572	.294	.153	.047	.016	.132	.012	.005
4	27 ANA	35	4	1	1	-.011	-.003	.251	-.006	-.003		.067	-.034	-.011	.085	-.008	-.003	.578	.489	.251	.088	-.018	-.006	.114	-.006	-.003
5	28 ANA	19	2	1	1	.043	.047	.511	-.008	.008		.233	.133	.043	.214	.121	.047	1082	.994	.511	.082	-.024	-.008	.137	.017	.008
6	29 ANA	73	6	1	1	-.001	-.001	.416	.026	.001		.098	-.003	-.001	.09	-.003	-.001	.899	.81	.416	.184	.078	.026	.123	.003	.001
7	30 ANA	47	5	1	1	.082	.081	.4	.486	.042		.355	.255	.082	.302	.209	.081	.867	.778	.4	1548	1442	.486	.213	.093	.042
8	33 ANA	31	4	1	1	.363	.35	.825	.252	.042		1228	1128	.363	.998	.905	.35	1695	1606	.825	.855	.749	.252	.214	.094	.042
9	35 ANA	24	3	1	1	.267	.248	.754	.026	.065		.928	.828	.267	.735	.642	.248	1557	1468	.754	.184	.078	.026	.264	.144	.065
10	36 ANA	40	4	1	1	0	.012	.688	0	.002		.1	-.001	0	.124	.031	.012	1428	1339	.688	.106	0	0	.124	.004	.002
11	37 ANA	58	6	1	1	.004	.013	.299	.005	-.005		.114	.014	.004	.126	.033	.013	.671	.583	.299	.12	.014	.005	.11	-.01	-.005
12	38 ANA	14	2	1	1	-.005	-.001	.36	.006	.013		.085	-.016	-.005	.091	-.002	-.001	.79	.701	.36	.123	.017	.006	.149	.029	.013
13	39 ANA	23	3	1	1	.069	.085	.198	-.005	.008		.313	.213	.069	.312	.219	.085	.473	.385	.198	.092	-.014	-.005	.138	.018	.008
14	40 ANA	35	4	1	1	.309	.267	.75	0	-.001		1058	.958	.309	.784	.691	.267	1549	1.46	.75	.107	.001	0	.118	-.002	-.001
15	41 ANA	43	5	1	1	.173	.156	.632	-.005	.022		.638	.537	.173	.496	.403	.156	1319	1231	.632	.091	-.015	-.005	.169	.049	.022
16	43 ANA	17	2	1	1	.165	.056	.259	.033	.031		.613	.513	.165	.238	.145	.056	.592	.504	.259	.205	.099	.033	.189	.069	.031
17	44 ANA	28	3	1	1	.003	.006	.309	.049	.016		.11	.01	.003	.109	.016	.006	.691	.602	.309	.251	.145	.049	.156	.036	.016
18	45 ANA	74	6	0	1	.077	.082	.536	-.006	-.005		.34	.24	.077	.306	.213	.082	1132	1043	.536	.089	-.017	-.006	.11	-.01	-.005
19	50 ANA	15	2	1	1	-.006	-.001	.456	.013	-.004		.082	-.018	-.006	.09	-.003	-.001	.976	.888	.456	.144	.038	.013	.112	-.008	-.004
20	51 ANA	42	5	1	1	-.008	-.001	.825	-.01	-.008		.077	-.024	-.008	.091	-.002	-.001	1694	1606	.825	.078	-.028	-.01	.102	-.018	-.008
21	52 ANA	31	4	1	1	.072	.081	.344	-.002	-.011		.325	.224	.072	.301	.208	.081	.759	.67	.344	.1	-.006	-.002	.096	-.024	-.011
22	54 ANA	78	6	0	1	.007	.016	.335	.201	.066		.123	.022	.007	.135	.042	.016	.74	.651	.335	.703	.597	.201	.265	.145	.066
23	55 ANA	38	4	0	1	-.001	-.003	.173	-.005	.004		.096	-.004	-.001	.086	-.007	-.003	.426	.338	.173	.091	-.015	-.005	.128	.008	.004
24	56 ANA	50	5	0	1	.691	.005	.55	.013	.011		2207	2136	.691	.116	.011	.005	1.17	1093	.55	.139	.037	.013	.136	.024	.011
25	57 ANA	55	6	0	1	.192	-.002	.663	.034	.067		.664	.594	.192	.101	-.004	-.002	1395	1318	.663	.197	.095	.034	.257	.145	.067
26	58 ANA	59	6	0	1	.011	-.002	.285	.012	.005		.105	.035	.011	.102	-.003	-.002	.645	.567	.285	.136	.034	.012	.123	.011	.005
27	59 ANA	13	2	0	1	.007	-.005	.076	-.006	-.005		.092	.021	.007	.094	-.011	-.005	.228	.15	.076	.086	-.016	-.006	.102	-.01	-.005
28	60 ANA	30	3	0	1	.04	-.005	.389	.002	.008		.193	.122	.04	.094	-.011	-.005	.851	.773	.389	.107	.005	.002	.129	.017	.008
29	61 ANA	33	4	0	1	.193	-.005	.199	.009	.001		.667	.597	.193	.095	-.01	-.005	.473	.395	.199	.126	.024	.009	.115	.003	.001
30	63 ANA	59	6	0	1	.025	0	.327	.008	.006		.148	.077	.025	.105	0	0	.728	.651	.327	.125	.023	.008	.124	.012	.006
31	64 ANA	57	6	0	1	.009	.014	.328	.003	.008		.097	.027	.009	.101	.032	.014	.729	.652	.328	.111	.009	.003	.13	.018	.008
32	65 ANA	21	3	0	1	.031	.002	.159	-.003	.001		.167	.097	.031	.11	.005	.002	.394	.316	.159	.094	-.008	-.003	.114	.002	.001
33	67 ANA	17	2	0	1	.007	-.001	.137	.004	.002		.093	.023	.007	.104	-.001	-.001	.35	.273	.137	.113	.011	.004	.117	.005	.002
34	68 ANA	18	2	0	1	.714	.02	.274	.021	-.013		2277	2206	.714	.148	.043	.02	.623	.546	.274	.16	.058	.021	.112	-.025	-.013
35	70 ANA	34	4	0	1	.003	-.005	.397	.036	.07		.081	.011	.003	.095	-.01	-.005	.867	.79	.397	.204	.102	.036	.262	.15	.07
36	71 ANA	44	5	0	1	.013	.041	.172	.267	.014		.112	.042	.013	.192	.087	.041	.42	.343	.172	.848	.746	.267	.142	.03	.014
37	73 ANA	56	6	0	1	.027	.64	.418	.406	.123		.154	.083	.027	1461	1356	.64	.908	.831	.418	1238	1136	.406	.376	.264	.123
38	75 ANA	44	5	1	1	.942	-.006	.504	.039	.058		2981	2911	.942	.093	-.012	-.006	1.08	1002	.504	.21	.108	.039	.236	.124	.058
39	77 ANA	9	1	0	1	.835	.389	.225	.004	.004		2.65	2579	.835	.928	.823	.389	.525	.448	.225	.114	.012	.004	.121	.009	.004
40	79 ANA	51	6	1	1	.011	.979	.23	.014	.008		.104	.034	.011	2177	2072	.979	.535	.457	.23	.141	.039	.014	.13	.018	.008
41	80 ANA	3	0	1	1	.002	.451	.01	-.01	-.011		.078	.007	.002	1.06	.955	.451	.098	.021	.01	.073	-.029	-.01	.089	-.023	-.011
42	81 ANA	42	5	0	1	.859	.172	.428	.002	-.006		2724	2654	.859	.469	.364	.172	.928	.85	.428	.107	.005	.002	.1	-.012	-.006
43	82 ANA	16	2	0	1	.957	-.01	.574	.229	.098		3028	2957	.957	.084	-.021	-.01	1219	1141	.574	.743	.641	.229	.322	.21	.098
44	83 ANA	3	0	1	1	-.002	-.01	.113	-.008	-.007		.066	-.005	-.002	.083	-.022	-.01	.303	.225	.113	.079	-.023	-.008	.097	-.015	-.007
45	85 ANA	68	6	0	1	.301	-.003	.498	.001	.004		1001	.93	.301	.099	-.006	-.003	1068	.991	.498	.105	.003	.001	.121	.009	.004
46	87 ANA	41	5	0	1	.016	.006	.285	.295	.177		.121	.05	.016	.117	.012	.006	.645	.567	.285	.928	.826	.295	.493	.381	.177
47	88 ANA	20	2	1	1	.825	.8	.426	.001	.021		2618	2547	.825	1798	1693	.8	.924	.847	.426	.105	.003	.001	.156	.044	.021
48	89 ANA	18	2	1	1	.791	.861	.773	.025	.01		2513	2443	.791	1929	1824	.861	1614	1536	.773	.171	.069	.025	.134	.022	.01
49	93 ANA	12	2	1	1	.017	.008	.515	-.003	-.002		.122	.052	.017	.122	.017	.008	1102	1025	.515	.094	-.008	-.003	.107	-.005	-.002
50	94 ANA	2	0	0	1	.003	.328	.176	-.01	-.013		.08	.009	.003	.8	.695	.328	.428	.351	.176	.075	-.027	-.01	.084	-.028	-.013
51	96 ANA	2	0	1	1	.002	-.011	.042	-.009	-.004		.078	.007	.002	.081	-.024	-.011	.161	.084	.042	.078	-.024	-.009	.104	-.008	-.004
52	97 ANA	3	0	0	1	.002	.97	.135	-.009	-.011		.078	.007	.002	2158	2053	.97	.346	.269	.135	.076	-.026	-.009	.089	-.023	-.011
53	99 ANA	51	6	1	1	.163	.897	.472	.011	.013		.576	.505	.163	2005	1.9	.897	1015	.938	.472	.133	.031	.011	.139	.027	.013
54	100 ANA	7	1	1	1	.46	-.011	.12	-.008	.006		1491	1421	.46	.081	-.024	-.011	.317	.239	.12	.08	-.022	-.008	.125	.013	.006
55	103 ANA	13	2	0	1	.953	-.002	.333	-.005	.004		3016	2945	.953	.101	-.004	-.002	.739	.661	.333	.089	-.013	-.005	.12	.008	.004
56	105 ANA	45	5	1	1	.382	.865	.216	.013	0		1.25	1179	.382	1937	1832	.865	.507	.43	.216	.137	.035	.013	.112	0	0
57	106 ANA	23	3	1	1	.003	.94	.126	.001	.004		.08	.01	.003	2096	1991	.94	.327	.25	.126	.104	.002	.001	.121	.009	.004
58	107 ANA	31	4	0	1	.633	.021	.515	.033	.02		2025	1954	.633	.149	.044	.021	1101	1024	.515	.195	.093	.033	.156	.044	.02
59	108 ANA	6	1	0	1	.058	.004	.254	.007	.002		.251	.18	.058	.113	.008	.004	.582	.505	.254	.121	.019	.007	.117	.005	.002
60	109 ANA	7	1	1	1	.002	-.006	.13	.136	0		.077	.007	.002	.093	-.012	-.006	.336	.259	.13	.483	.381	.136	.112	0	0
61	110 ANA	24	3	1	1	.026	.709	.442	.028	.011		.151	.08	.026	1606	1501	.709	.956	.878	.442	.18	.078	.028	.135	.023	.011
62	111 ANA	20	2	1	1	.007	-.001	.204	.009	.015		.092	.021	.007	.102	-.003	-.001	.483	.406	.204	.128	.026	.009	.144	.032	.015
63	112 ANA	12	2	0	1	.004	.022	.085	0	.005		.083	.013	.004	.151	.046	.022	.247	.17	.085	.102	0	0	.122	.01	.005
64	113 ANA	13	2	1	1	.845	.804	.429	-.006	-.003		2704	2.62	.845	2329	2236	.804	.907	.821	.429	.082	-.017	-.006	.105	-.005	-.003
65	118 ANA	60	6	0	1	.037	.014	.261	.564	.376		.199	.114	.037	.133	.04	.014	.585	.499	.261	1594	1495	.564	.832	.722	.376
66	119 ANA	29	3	1	1	.002	-.005	.119	.036	-.006		.092	.007	.002	.078	-.015	-.005	.313	.227	.119	.194	.095	.036	.098	-.012	-.006
67	122 ANA	62	6	0	1	.269	.243	.395	.059	.136		.92	.835	.269	.769	.676	.243	.842	.756	.395	.254	.155	.059	.372	.262	.136
68	123 ANA	24	3	1	1	.016	.012	.264	.001	.012		.136	.051	.016	.127	.034	.012	.592	.506	.264	.103	.004	.001	.132	.022	.012
69	124 ANA	29	3	0	1	.575	.564	.135	-.008	-.005		1869	1785	.575	1.66	1567	.564	.345	.259	.135	.078	-.021	-.008	.1	-.01	-.005
70	126 ANA	50	5	1	1	.005	-.003	.386	-.001	.002		.099	.015	.005	.085	-.008	-.003	.825	.739	.386	.096	-.003	-.001	.113	.003	.002
71	129 ANA	36	4	1	1	.062	.084	.203	.018	.032		.277	.192	.062	.327	.234	.084	.474	.388	.203	.146	.047	.018	.171	.061	.032
72	130 ANA	16	2	1	1	.403	.333	.148	-.002	-.003		1336	1251	.403	1019	.926	.333	.37	.284	.148	.095	-.004	-.002	.105	-.005	-.003
73	133 ANA	9	1	1	1	-.004	-.01	.042	-.007	-.001		.073	-.011	-.004	.066	-.027	-.01	.166	.08	.042	.08	-.019	-.007	.108	-.002	-.001
74	134 ANA	25	3	0	1	.052	.041	.424	.009	.003		.247	.162	.052	.206	.113	.041	.897	.811	.424	.122	.023	.009	.115	.005	.003
75	135 ANA	44	5	0	1	.016	.012	.339	.451	.095		.134	.049	.016	.127	.034	.012	.736	.65	.339	1296	1197	.451	.293	.183	.095
76	136 ANA	29	3	1	1	.128	.147	.688	.844	.174		.483	.398	.128	.502	.409	.147	1403	1317	.688	2337	2238	.844	.444	.334	.174
77	138 ANA	34	4	1	1	.107	.063	.407	.047	.01		.418	.333	.107	.267	.174	.063	.865	.779	.407	.223	.124	.047	.129	.019	.01
78	142 ANA	53	6	0	1	.012	.016	.412	.01	.049		.122	.038	.012	.136	.043	.016	.875	.789	.412	.124	.025	.01	.203	.093	.049
79	143 ANA	21	3	1	1	.745	.802	.367	.003	-.006		2396	2312	.745	2322	2229	.802	.79	.704	.367	.107	.008	.003	.098	-.012	-.006
80	145 ANA	7	1	1	1	.002	-.007	.14	.072	-.011		.092	.007	.002	.073	-.02	-.007	.354	.268	.14	.289	.19	.072	.089	-.021	-.011
81	146 ANA	28	3	0	1	.005	-.001	.695	.007	.003		.102	.017	.005	.091	-.002	-.001	1418	1332	.695	.116	.017	.007	.115	.005	.003
82	147 ANA	22	3	1	1	.004	.001	.294	.013	-.001		.098	.013	.004	.096	.003	.001	.649	.563	.294	.134	.035	.013	.108	-.002	-.001
83	148 ANA	38	4	1	1	.002	0	.294	.017	-.005		.09	.006	.002	.093	0	0	.65	.564	.294	.143	.044	.017	.101	-.009	-.005
84	149 ANA	16	2	1	1	.067	.083	.372	.052	.001		.294	.209	.067	.324	.231	.083	.798	.712	.372	.237	.138	.052	.111	.001	.001
85	150 ANA	40	4	0	1	.343	.39	.58	.006	.231		1148	1063	.343	1176	1083	.39	1197	1111	.58	.115	.016	.006	.554	.444	.231
86	151 ANA	69	6	1	1	.018	.022	.368	-.008	.009		.139	.055	.018	.155	.062	.022	.791	.705	.368	.077	-.022	-.008	.126	.016	.009
87	153 ANA	18	2	1	1	.092	.108	.098	.052	.007		.369	.284	.092	.392	.299	.108	.273	.187	.098	.236	.137	.052	.123	.013	.007
88	154 ANA	13	2	0	1	.042	.048	.255	.012	-.001		.216	.132	.042	.225	.132	.048	.574	.488	.255	.13	.031	.012	.108	-.002	-.001
89	155 ANA	15	2	1	1	.228	.231	.332	-.011	-.003		.791	.706	.228	.736	.643	.231	.722	.636	.332	.07	-.029	-.011	.104	-.006	-.003
90	157 ANA	53	6	1	1	.399	.448	.805	-.009	.001		1323	1238	.399	1.34	1247	.448	1627	1541	.805	.076	-.023	-.009	.111	.001	.001
91	158 ANA	98	6	0	1	.047	.045	.469	.375	.136		.23	.146	.047	.218	.125	.045	.984	.898	.469	1094	.995	.375	.371	.261	.136
92	159 ANA	5	0	1	1	-.007	-.011	.081	.027	-.005		.063	-.021	-.007	.064	-.029	-.011	.241	.155	.081	.17	.071	.027	.1	-.01	-.005
93	160 ANA	10	1	0	1	-.001	-.004	.053	.003	-.011		.081	-.003	-.001	.081	-.012	-.004	.187	.101	.053	.108	.009	.003	.088	-.022	-.011
94	161 ANA	12	2	1	1	.579	.523	.036	.012	-.014		1.88	1795	.579	1548	1455	.523	.155	.069	.036	.131	.032	.012	.083	-.027	-.014
95	163 ANA	53	6	1	1	.004	-.001	.406	.022	.016		.096	.012	.004	.091	-.002	-.001	.863	.777	.406	.157	.058	.022	.141	.031	.016
96	164 ANA	72	6	0	1	.007	.006	.591	.018	.023		.106	.022	.007	.11	.017	.006	1218	1132	.591	.146	.047	.018	.155	.045	.023
97	165 ANA	22	3	0	1	.032	.028	.05	-.003	-.005		.185	.1	.032	.17	.077	.028	.181	.095	.05	.092	-.007	-.003	.101	-.009	-.005
98	166 ANA	21	3	1	1	.022	.021	.108	.003	-.008		.154	.07	.022	.152	.059	.021	.293	.207	.108	.106	.007	.003	.094	-.016	-.008
99	167 ANA	12	2	1	1	.714	.75	.36	-.002	.006		2298	2214	.714	2177	2084	.75	.776	.69	.36	.093	-.006	-.002	.121	.011	.006
100	168 ANA	54	6	1	1	.701	.73	.798	-.006	.056		2259	2175	.701	2124	2031	.73	1615	1529	.798	.082	-.017	-.006	.218	.108	.056
101	169 ANA	10	1	1	1	-.002	-.002	.107	.009	-.003		.079	-.005	-.002	.087	-.006	-.002	.291	.205	.107	.122	.023	.009	.104	-.006	-.003
102	170 ANA	10	1	0	1	.012	.008	.084	-.002	-.006		.122	.037	.012	.115	.022	.008	.248	.162	.084	.093	-.006	-.002	.098	-.012	-.006
103	171 ANA	59	6	0	1	-.001	-.005	.099	.002	.014		.082	-.002	-.001	.08	-.013	-.005	.276	.19	.099	.104	.005	.002	.137	.027	.014
104	172 ANA	78	6	1	1	-.001	.01	.289	.14	-.004		.09	-.002	-.001	.133	.03	.01	.655	.562	.289	.445	.366	.14	.091	-.009	-.004
105	175 ANA	19	2	1	1	.008	.006	.321	.021	.003		.119	.026	.008	.119	.017	.006	.716	.624	.321	.153	.048	.021	.105	.006	.003
106	176 ANA	65	6	1	1	.693	.734	.864	.052	.029		2296	2203	.693	2281	2179	.734	1.77	1678	.864	.223	.118	.052	.157	.057	.029
107	177 ANA	35	4	0	1	.001	-.004	.131	.008	.003		.095	.003	.001	.09	-.012	-.004	.33	.235	.131	.123	.019	.008	.105	.006	.003
108	178 ANA	67	6	0	1	.001	-.002	.082	.008	-.003		.097	.004	.001	.097	-.005	-.002	.251	.158	.082	.123	.019	.008	.093	-.006	-.003
109	181 ANA	5	0	1	1	-.001	-.006	.197	-.003	-.004		.088	-.005	-.001	.086	-.016	-.006	.476	.383	.197	.097	-.008	-.003	.092	-.008	-.004
110	184 ANA	3	0	1	1	-.003	-.006	.059	.002	.002		.084	-.009	-.003	.084	-.019	-.006	.206	.114	.059	.108	.004	.002	.103	.004	.002
111	185 ANA	52	6	1	1	.006	.009	.617	.444	.021		.112	.02	.006	.13	.028	.009	1292	1199	.617	1244	1166	.444	.141	.041	.021
112	186 ANA	8	1	1	1	-.004	-.009	.053	.063	0		.079	-.013	-.004	.077	-.026	-.009	.195	.103	.053	.243	.164	.063	.099	0	0
113	188 ANA	41	5	1	1	-.002	-.007	.196	.012	-.006		.087	-.005	-.002	.083	-.019	-.007	.473	.38	.196	.111	.033	.012	.087	-.013	-.006
114	01 J-PR	34	4	0	2	.977	.812	.21	.21	.016		2907	2798	.977	2118	2038	.812	.571	.48	.21	.712	.629	.21	.137	.032	.016
115	02 J-PR	37	4	0	2	.071	.027	.164	.801	.097		.312	.203	.071	.147	.068	.027	.466	.375	.164	2479	2396	.801	.303	.197	.097
116	03 J-PR	45	5	0	2	-.001	.011	.195	.018	.182		.107	-.002	-.001	.108	.028	.011	.535	.444	.195	.138	.055	.018	.475	.369	.182
117	04 J-PR	67	6	0	2	.14	.17	.342	.544	.051		.511	.402	.14	.507	.427	.17	.873	.782	.342	1.71	1627	.544	.21	.104	.051
118	05 J-PR	39	4	0	2	.02	.033	.224	.505	.075		.166	.057	.02	.163	.084	.033	.602	.511	.224	1594	1511	.505	.258	.152	.075
119	06 J-PR	40	4	0	2	.448	.311	.307	1	.224		1392	1283	.448	.86	.78	.311	.793	.702	.307	3074	2991	1	.56	.454	.224
120	07 J-PR	55	6	0	2	.255	.322	.613	.813	.227		.839	.73	.255	.889	.809	.322	1.49	1399	.613	2515	2432	.813	.567	.461	.227
121	08 J-PR	52	6	0	2	.289	.35	.482	.253	.028		.937	.828	.289	.958	.878	.35	1193	1102	.482	.841	.758	.253	.162	.057	.028
122	09 J-PR	27	3	0	2	-.001	-.004	.164	.081	-.008		.107	-.002	-.001	.07	-.009	-.004	.465	.374	.164	.324	.241	.081	.089	-.017	-.008
123	10 J-PR	49	5	1	2	.009	.009	.297	.161	.031		.134	.025	.009	.103	.024	.009	.77	.679	.297	.566	.483	.161	.167	.062	.031
124	11 J-PR	53	6	0	2	.047	.066	.465	.608	.289		.244	.135	.047	.244	.165	.066	1153	1062	.465	1902	1819	.608	.691	.586	.289
125	13 J-PR	42	5	1	2	.03	.031	.318	.099	.003		.195	.086	.03	.157	.078	.031	.818	.727	.318	.379	.296	.099	.112	.006	.003
126	14 J-PR	32	4	1	2	.017	.015	.309	.077	-.006		.158	.049	.017	.117	.038	.015	.797	.706	.309	.312	.229	.077	.093	-.012	-.006
127	15 J-PR	55	6	0	2	.066	.063	.518	.376	.064		.297	.188	.066	.237	.157	.063	1273	1182	.518	1208	1125	.376	.235	.13	.064
128	16 J-PR	58	6	1	2	.091	.055	.165	.639	.292		.37	.261	.091	.218	.138	.055	.468	.377	.165	1995	1912	.639	.698	.592	.292
129	17 J-PR	52	6	0	2	.743	.661	.774	.938	.433		2237	2128	.743	1.74	1661	.661	1859	1768	.774	2888	2805	.938	.985	.879	.433
130	18 J-PR	43	5	1	2	.253	.167	.128	.857	.711		.833	.724	.253	.499	.419	.167	.383	.292	.128	2645	2562	.857	1549	1443	.711
131	19 J-PR	48	5	0	2	.005	.002	.107	.464	.035		.122	.013	.005	.085	.006	.002	.335	.244	.107	1472	1389	.464	.177	.072	.035
132	20 J-PR	47	5	1	2	.129	.068	.598	.477	.106		.559	.406	.129	.347	.173	.068	1422	1.32	.598	1652	1455	.477	.289	.196	.106
133	21 J-PR	49	5	0	2	.006	-.012	.363	.15	.072		.096	.02	.006	.144	-.03	-.012	.904	.802	.363	.653	.456	.15	.227	.134	.072
134	22 J-PR	37	4	0	2	.076	.044	.338	.367	.074		.392	.239	.076	.285	.111	.044	.848	.746	.338	1316	1119	.367	.231	.137	.074
135	23 J-PR	7	1	0	2	.005	-.014	.626	.144	.02		.092	.016	.005	.14	-.034	-.014	1483	1381	.626	.636	.439	.144	.131	.037	.02
136	24 J-PR	6	1	0	2	.006	-.016	.554	.027	.005		.094	.018	.006	.133	-.041	-.016	1324	1222	.554	.279	.082	.027	.103	.009	.005
137	25 J-PR	23	3	0	2	.004	-.02	.284	.017	.001		.087	.011	.004	.124	-.051	-.02	.729	.627	.284	.25	.053	.017	.095	.001	.001
138	26 J-PR	30	3	0	2	.078	.057	.259	.055	.025		.397	.244	.078	.318	.144	.057	.673	.571	.259	.364	.167	.055	.139	.046	.025
139	27 J-PR	46	5	0	2	.861	.66	.664	.762	.163		2858	2705	.861	1.84	1666	.66	1567	1465	.664	2517	2.32	.762	.395	.302	.163
140	28 J-PR	50	5	0	2	.026	.006	.517	.531	.046		.233	.08	.026	.19	.015	.006	1244	1142	.517	1816	1619	.531	.179	.086	.046
141	29 J-PR	51	6	0	2	.01	-.007	.518	.598	.305		.184	.031	.01	.157	-.017	-.007	1245	1143	.518	2.02	1823	.598	.657	.564	.305
142	30 J-PR	39	4	0	2	.659	.553	.586	.768	.212		2225	2072	.659	1571	1396	.553	1396	1294	.586	2538	2341	.768	.486	.392	.212
143	31 J-PR	44	5	1	2	.003	-.005	.451	.045	.005		.163	.01	.003	.161	-.013	-.005	1096	.994	.451	.334	.137	.045	.104	.01	.005
144	32 J-PR	39	4	1	2	.01	.007	.484	.23	.012		.183	.03	.01	.191	.017	.007	1171	1069	.484	.899	.702	.23	.117	.023	.012
145	33 J-PR	11	2	1	2	.003	-.012	.297	.032	.004		.163	.01	.003	.145	-.03	-.012	.758	.656	.297	.294	.097	.032	.1	.007	.004
146	34 J-PR	54	6	0	2	.009	0	.177	.024	.015		.181	.028	.009	.176	.001	0	.493	.391	.177	.271	.074	.024	.121	.027	.015
147	35 J-PR	58	6	0	2	.04	.027	.213	.446	.098		.278	.125	.04	.243	.069	.027	.572	.47	.213	1556	1359	.446	.276	.182	.098
148	36 J-PR	67	6	0	2	.13	.037	.504	.365	.046		.561	.408	.13	.267	.092	.037	1213	1111	.504	1308	1111	.365	.179	.085	.046
149	37 J-PR	75	6	0	2	.023	.016	.049	.039	.005		.224	.071	.023	.214	.04	.016	.21	.108	.049	.317	.12	.039	.102	.009	.005
150	38 J-PR	9	1	1	2	-.017	-.024	.201	.088	.001		.099	-.054	-.017	.114	-.06	-.024	.546	.444	.201	.467	.27	.088	.096	.003	.001
151	39 J-PR	58	6	0	2	.378	.287	.735	.236	.025		1.34	1187	.378	.899	.725	.287	1723	1621	.735	.917	.72	.236	.141	.047	.025
152	40 J-PR	44	5	0	2	.064	.06	.376	.212	.091		.355	.202	.064	.327	.152	.06	.932	.83	.376	.842	.645	.212	.263	.169	.091
153	41 J-PR	53	6	0	2	.152	.229	.665	.865	.343		.631	.478	.152	.752	.577	.229	1569	1467	.665	2833	2636	.865	.728	.635	.343
154	42 J-PR	9	1	0	2	-.012	-.021	.148	.001	-.006		.114	-.039	-.012	.121	-.053	-.021	.428	.326	.148	.201	.004	.001	.083	-.01	-.006
155	43 J-PR	38	4	1	2	-.001	-.015	.165	.094	.006		.148	-.005	-.001	.137	-.038	-.015	.466	.364	.165	.483	.286	.094	.104	.011	.006
156	44 J-PR	53	6	0	2	.393	.418	.477	.422	.123		1389	1236	.393	1229	1054	.418	1154	1052	.477	1482	1285	.422	.321	.228	.123
157	45 J-PR	48	5	1	2	-.011	-.023	.195	.128	.08		.119	-.034	-.011	.117	-.057	-.023	.532	.43	.195	.586	.389	.128	.242	.148	.08
158	46 J-PR	50	5	0	2	.184	.212	.331	.526	.088		.73	.577	.184	.71	.535	.212	.833	.731	.331	1.8	1603	.526	.257	.163	.088
159	47 J-PR	52	6	1	2	.484	.479	.314	.392	.107		1675	1522	.484	1382	1208	.479	.795	.693	.314	1.39	1193	.392	.292	.198	.107
160	48 J-PR	12	2	0	2	.161	.141	.395	.023	-.005		.659	.506	.161	.531	.356	.141	.974	.872	.395	.267	.07	.023	.085	-.009	-.005
161	49 J-PR	50	5	0	2	.362	.278	1095	.815	.141		1291	1138	.362	.877	.702	.278	2518	2416	1095	2679	2482	.815	.354	.261	.141
162	50 J-PR	43	5	0	2	.016	.011	.749	.111	.016		.205	.052	.016	.201	.027	.011	1755	1653	.749	.534	.337	.111	.123	.03	.016
163	51 J-PR	35	4	0	2	.172	.115	.359	.309	.009		.694	.541	.172	.466	.291	.115	.895	.793	.359	1139	.942	.309	.11	.017	.009
164	52 J-PR	12	2	0	2	.983	.854	.289	.061	.005		3241	3088	.983	2329	2154	.854	.739	.637	.289	.383	.186	.061	.104	.01	.005
165	53 J-PR	35	4	1	2	.002	-.009	.183	.28	.083		.161	.008	.002	.152	-.022	-.009	.505	.403	.183	1049	.852	.28	.246	.153	.083
166	54 J-PR	8	1	1	2	-.002	-.021	.434	.031	.005		.071	-.005	-.002	.123	-.052	-.021	1061	.959	.434	.293	.096	.031	.103	.009	.005
167	55 J-PR	12	2	0	2	.002	-.02	.772	.099	-.003		.083	.007	.002	.125	-.049	-.02	1805	1703	.772	.5	.303	.099	.087	-.006	-.003
168	56 J-PR	8	1	1	2	-.001	-.025	.148	.016	.005		.149	-.004	-.001	.112	-.063	-.025	.429	.327	.148	.246	.049	.016	.102	.009	.005
169	57 J-PR	8	1	1	2	.019	-.007	.029	.032	-.005		.134	.058	.019	.156	-.018	-.007	.167	.065	.029	.294	.097	.032	.084	-.01	-.005
170	58 J-PR	23	3	0	2	.041	.007	.159	.112	.004		.28	.127	.041	.192	.018	.007	.454	.352	.159	.537	.34	.112	.1	.007	.004
171	59 J-PR	45	5	1	2	.312	.26	.716	.473	.15		1133	.98	.312	.83	.656	.26	1683	1581	.716	1638	1441	.473	.371	.278	.15
172	60 J-PR	8	1	0	2	.026	.023	.336	.024	.005		.138	.077	.026	.151	.069	.023	.882	.795	.336	.125	.066	.024	.141	.012	.005
173	63 J-PR	39	4	0	2	.027	.023	.524	.221	.049		.14	.079	.027	.152	.071	.023	1328	1242	.524	.673	.615	.221	.244	.115	.049
174	64 J-PR	28	3	1	2	.018	.018	.595	.02	.01		.114	.053	.018	.137	.056	.018	1496	1409	.595	.113	.054	.02	.152	.024	.01
175	66 J-PR	12	2	0	2	.006	.004	.223	.045	-.004		.079	.018	.006	.094	.012	.004	.614	.528	.223	.183	.124	.045	.119	-.01	-.004
176	67 J-PR	26	3	1	2	.022	.018	.254	.036	.008		.126	.065	.022	.137	.056	.018	.689	.602	.254	.16	.101	.036	.147	.018	.008
177	68 J-PR	58	6	1	2	.036	.033	.625	.043	.015		.166	.105	.036	.18	.099	.033	1567	1481	.625	.177	.119	.043	.164	.036	.015
178	69 J-PR	9	1	1	2	.051	.056	.169	.226	0		.211	.15	.051	.25	.169	.056	.486	.399	.169	.689	.631	.226	.127	-.001	0
179	70 J-PR	8	1	1	2	.054	.052	.059	.013	.01		.22	.159	.054	.238	.156	.052	.226	.14	.059	.095	.036	.013	.151	.022	.01
180	71 J-PR	6	1	0	2	.013	.015	.4	.016	-.012		.1	.039	.013	.127	.045	.015	1033	.947	.4	.103	.045	.016	.099	-.029	-.012
181	72 J-PR	32	4	1	2	.01	.01	.37	.028	-.011		.09	.029	.01	.111	.03	.01	.962	.876	.37	.136	.077	.028	.103	-.025	-.011
182	73 J-PR	49	5	0	2	.01	.005	.323	.292	.079		.091	.03	.01	.097	.015	.005	.852	.766	.323	.873	.814	.292	.315	.187	.079
183	74 J-PR	37	4	1	2	.351	.385	.57	.752	.149		1089	1028	.351	1245	1164	.385	1438	1351	.57	2154	2096	.752	.481	.352	.149
184	75 J-PR	12	2	1	2	.005	.001	.353	.022	.006		.076	.015	.005	.084	.002	.001	.922	.835	.353	.12	.062	.022	.142	.013	.006
185	76 J-PR	43	5	1	2	.003	.005	.432	.092	-.004		.069	.008	.003	.097	.016	.005	1111	1024	.432	.314	.255	.092	.119	-.01	-.004
186	77 J-PR	44	5	0	2	.36	.424	.63	.745	.116		1117	1056	.36	1364	1283	.424	1578	1492	.63	2134	2075	.745	.402	.273	.116
187	01 J-SJ	43	5	0	2	.009	.01	.561	.465	.224		.087	.026	.009	.112	.031	.01	1415	1328	.561	1353	1295	.465	.656	.527	.224
188	02 J-SJ	26	3	0	2	.042	.035	.295	.016	-.012		.184	.123	.042	.186	.104	.035	.786	.699	.295	.102	.043	.016	.1	-.028	-.012
189	03 J-SJ	44	5	0	2	.228	.244	.555	.639	.176		.73	.669	.228	.82	.739	.244	1401	1315	.555	1838	1779	.639	.543	.414	.176
190	06 J-SJ	32	4	0	2	.041	.029	.289	.566	.056		.182	.121	.041	.169	.087	.029	.771	.684	.289	1635	1577	.566	.26	.131	.056
191	07 J-SJ	6	1	0	2	-.001	.011	.209	.008	-.017		.059	-.002	-.001	.114	.032	.011	.581	.494	.209	.081	.023	.008	.087	-.041	-.017
192	08 J-SJ	44	5	1	2	.032	.033	.126	.508	.104		.154	.093	.032	.18	.098	.033	.385	.299	.126	1475	1416	.508	.373	.244	.104
193	09 J-SJ	46	5	0	2	.286	.323	.462	.287	.111		.899	.838	.286	1058	.976	.323	1181	1094	.462	.858	.799	.287	.391	.262	.111
194	10 J-SJ	71	6	1	2	.038	.038	.046	.16	.023		.173	.112	.038	.197	.115	.038	.195	.109	.046	.504	.445	.16	.182	.054	.023
195	11 J-SJ	41	5	0	2	.008	.002	.502	.371	.405		.084	.023	.008	.088	.006	.002	1276	1.19	.502	1092	1034	.371	1083	.955	.405
196	12 J-SJ	46	5	0	2	.261	.256	.566	.119	.009		.825	.764	.261	.856	.775	.256	1427	1.34	.566	.389	.33	.119	.149	.021	.009
197	13 J-SJ	53	6	1	2	.308	.315	.231	.282	.007		.965	.904	.308	1032	.951	.315	.634	.547	.231	.845	.787	.282	.144	.015	.007
198	14 J-SJ	44	5	0	2	.514	.569	.911	.499	.41		1566	1505	.514	1.8	1719	.569	2246	2159	.911	1.45	1392	.499	1097	.968	.41
199	15 J-SJ	27	3	1	2	.004	.006	.186	.013	-.012		.073	.012	.004	.1	.019	.006	.527	.441	.186	.094	.036	.013	.101	-.028	-.012
200	16 J-SJ	64	6	0	2	.396	.471	.451	.359	.181		1221	1.16	.396	1505	1424	.471	1154	1068	.451	1059	1	.359	.554	.426	.181
201	17 J-SJ	31	4	1	2	.057	.044	.17	.245	.062		.228	.167	.057	.216	.134	.044	.488	.402	.17	.741	.682	.245	.275	.146	.062
202	19 J-SJ	23	3	0	2	.043	.047	.488	.019	-.005		.186	.125	.043	.224	.142	.047	1242	1156	.488	.111	.053	.019	.117	-.011	-.005
203	20 J-SJ	2	0	1	2	.002	0	.127	.009	-.013		.067	.006	.002	.083	.001	0	.387	.301	.127	.083	.024	.009	.097	-.032	-.013
204	21 J-SJ	43	5	0	2	.185	.187	.348	.155	.02		.604	.543	.185	.645	.564	.187	.91	.824	.348	.491	.433	.155	.175	.046	.02
205	22 J-SJ	40	4	0	2	.024	.01	.239	.149	.015		.132	.071	.024	.113	.031	.01	.652	.566	.239	.473	.414	.149	.163	.035	.015
206	23 J-SJ	49	5	1	2	.559	.574	.359	.097	.019		1699	1638	.559	1817	1735	.574	.937	.851	.359	.33	.271	.097	.173	.044	.019
207	24 J-SJ	43	5	0	2	.016	.013	.187	.132	.004		.107	.046	.016	.121	.04	.013	.528	.442	.187	.426	.368	.132	.138	.009	.004
208	25 J-SJ	48	5	1	2	.009	.006	.104	.102	.004		.087	.026	.009	.099	.018	.006	.334	.247	.104	.343	.284	.102	.138	.01	.004
209	27 J-SJ	60	6	0	2	.005	.006	.179	.016	-.004		.076	.015	.005	.1	.018	.006	.509	.423	.179	.102	.043	.016	.12	-.009	-.004
210	28 J-SJ	.33	0	0	2	.104	.1	.166	.011	-.011		.365	.304	.104	.384	.302	.1	.48	.394	.166	.09	.032	.011	.102	-.026	-.011
211	30 J-SJ	39	4	0	2	.346	.32	.614	.478	.078		1076	1015	.346	1049	.968	.32	1541	1454	.614	1389	1331	.478	.311	.183	.078
212	31 J-SJ	26	3	1	2	.146	.145	.374	.026	-.013		.476	.408	.146	.507	.424	.145	.944	.849	.374	.144	.074	.026	.1	-.026	-.013
213	32 J-SJ	11	2	0	2	.376	.372	.206	.02	0		1121	1053	.376	1171	1088	.372	.563	.468	.206	.127	.057	.02	.126	0	0
214	33 J-SJ	9	1	0	2	.128	.116	.284	.005	-.001		.428	.359	.128	.422	.339	.116	.74	.645	.284	.085	.015	.005	.124	-.002	-.001
215	34 J-SJ	10	1	0	2	.399	.394	.076	.006	-.004		1187	1118	.399	1235	1152	.394	.267	.172	.076	.087	.017	.006	.117	-.009	-.004
216	35 J-SJ	8	1	0	2	.005	.003	.118	.013	-.012		.082	.013	.005	.092	.009	.003	.362	.267	.118	.106	.037	.013	.102	-.024	-.012
217	36 J-SJ	50	5	0	2	.008	.005	.128	.273	.031		.092	.023	.008	.099	.016	.005	.386	.291	.128	.837	.767	.273	.191	.065	.031
218	37 J-SJ	44	5	0	2	.018	.014	.289	.047	.023		.118	.05	.018	.123	.04	.014	.751	.656	.289	.202	.132	.047	.174	.048	.023
219	38 J-SJ	6	1	1	2	.028	.021	.162	.027	-.007		.146	.078	.028	.143	.06	.021	.463	.368	.162	.146	.076	.027	.111	-.015	-.007
220	39 J-SJ	40	4	1	2	.128	.114	.312	.506	.007		.427	.359	.128	.415	.332	.114	.802	.707	.312	1.49	1.42	.506	.14	.014	.007
221	40 J-SJ	50	5	1	2	-.001	.001	.217	.022	.01		.066	-.003	-.001	.084	.001	.001	.588	.493	.217	.131	.062	.022	.147	.021	.01
222	41 J-SJ	9.83	1	1	2	.293	.317	.339	.016	-.009		.888	.82	.293	1009	.926	.317	.863	.768	.339	.114	.045	.016	.107	-.019	-.009
223	42 J-SJ	42	5	0	2	.098	.087	.26	.449	.035		.343	.275	.098	.338	.255	.087	.684	.589	.26	1329	1.26	.449	.199	.073	.035
224	43 J-SJ	42	5	1	2	.068	.055	.521	.348	.327		.258	.189	.068	.245	.162	.055	1276	1181	.521	1047	.977	.348	.803	.677	.327
225	44 J-SJ	28	3	0	2	.294	.327	.533	.083	.039		.892	.824	.294	1038	.955	.327	1305	1.21	.533	.304	.234	.083	.207	.081	.039
226	45 J-SJ	4	0	0	2	.001	-.001	.114	-.001	-.009		.07	.002	.001	.081	-.002	-.001	.353	.258	.114	.067	-.003	-.001	.107	-.019	-.009
227	47 J-SJ	11	2	0	2	.791	.752	.097	.062	-.016		2281	2213	.791	2283	2.2	.752	.314	.219	.097	.243	.173	.062	.092	-.034	-.016
228	48 J-SJ	43	5	0	2	.006	.005	.035	.054	.01		.084	.016	.006	.097	.014	.005	.174	.079	.035	.22	.151	.054	.147	.021	.01
229	49 J-SJ	34	4	1	2	.657	.652	.573	.321	.219		1908	1839	.657	1989	1906	.652	1395	1.3	.573	.971	.901	.321	.578	.452	.219
230	50 J-SJ	46	5	0	2	.155	.158	.25	.086	.146		.504	.435	.155	.544	.461	.158	.662	.567	.25	.31	.24	.086	.428	.302	.146
231	51 J-SJ	35	4	0	2	.066	.069	.493	.12	.031		.253	.184	.066	.283	.2	.069	1213	1118	.493	.405	.336	.12	.19	.064	.031
232	52 J-SJ	27	3	1	2	.02	.021	.105	.08	-.006		.125	.057	.02	.144	.061	.021	.334	.239	.105	.294	.224	.08	.114	-.012	-.006
233	53 J-SJ	41	5	1	2	.175	.193	.72	.073	-.011		.559	.491	.175	.646	.563	.193	1729	1634	.72	.274	.204	.073	.104	-.022	-.011
234	54 J-SJ	25	3	1	2	0	-.001	.395	.036	-.007		.069	.001	0	.08	-.003	-.001	.991	.896	.395	.171	.102	.036	.113	-.013	-.007
235	55 J-SJ	52	6	1	2	.223	.233	.358	.067	-.007		.693	.625	.223	.765	.682	.233	.907	.812	.358	.258	.188	.067	.112	-.014	-.007
236	56 J-SJ	27	3	1	2	.02	.021	.185	.012	-.013		.123	.055	.02	.144	.061	.021	.515	.42	.185	.103	.034	.012	.1	-.026	-.013
237	57 J-SJ	50	5	0	2	.019	.029	.094	.345	.308		.122	.053	.019	.167	.084	.029	.308	.213	.094	1039	.97	.345	.763	.637	.308
238	58 J-SJ	10	1	1	2	.03	.028	.061	.014	-.015		.153	.085	.03	.166	.083	.028	.232	.137	.061	.11	.041	.014	.095	-.031	-.015
239	59 J-SJ	22	3	1	2	.109	.055	.124	.001	-.011		.374	.305	.109	.244	.161	.055	.377	.282	.124	.072	.003	.001	.104	-.022	-.011
240	60 J-SJ	8	1	0	2	-.001	-.003	.078	-.001	-.014		.065	-.003	-.001	.074	-.009	-.003	.272	.177	.078	.067	-.002	-.001	.097	-.029	-.014
241	61 J-SJ	30	3	1	2	.085	.091	.548	.276	.093		.307	.239	.085	.349	.266	.091	1339	1244	.548	.846	.776	.276	.319	.193	.093
242	62 J-SJ	57	6	0	2	.084	.081	.12	.517	.566		.302	.234	.084	.32	.237	.081	.367	.272	.12	1522	1453	.517	1297	1171	.566
243	63 J-SJ	26	3	1	2	.007	.004	.234	.255	.013		.089	.021	.007	.096	.013	.004	.626	.531	.234	.786	.717	.255	.153	.027	.013
244	64 J-SJ	25	3	1	2	.155	.148	.245	.005	-.011		.503	.434	.155	.516	.433	.148	.651	.556	.245	.084	.015	.005	.104	-.022	-.011
245	66 J-SJ	50	5	0	2	.053	.055	.131	.004	-.01		.216	.148	.053	.243	.16	.055	.391	.296	.131	.08	.01	.004	.106	-.02	-.01
246	67 J-SJ	27	3	1	2	.183	.216	.478	.004	.002		.582	.513	.183	.714	.631	.216	1179	1084	.478	.08	.011	.004	.131	.005	.002
247	68 J-SJ	52	6	0	2	.584	.59	.732	.319	.11		1704	1635	.584	1808	1725	.59	1756	1661	.732	.964	.895	.319	.354	.228	.11
248	69 J-SJ	13	2	1	2	.354	.341	.338	.033	-.009		1059	.99	.354	1.08	.997	.341	.861	.766	.338	.162	.092	.033	.108	-.018	-.009
249	70 J-SJ	9	1	0	2	.011	.01	.044	.012	-.015		.1	.031	.011	.111	.028	.01	.194	.099	.044	.102	.033	.012	.094	-.032	-.015
250	71 J-SJ	55	6	0	2	.068	.067	.333	.07	.091		.258	.189	.068	.279	.196	.067	.851	.756	.333	.265	.195	.07	.314	.188	.091
251	74 J-SJ	6	1	1	2	.218	.057	.05	.011	.019		.68	.611	.218	.249	.166	.057	.209	.114	.05	.1	.031	.011	.166	.04	.019
252	75 J-SJ	35	4	1	2	.005	.013	.535	.052	.016		.089	.013	.005	.118	.037	.013	1173	1.08	.535	.209	.141	.052	.142	.035	.016
253	76 J-SJ	47	5	1	2	.015	.024	.269	.055	.025		.117	.041	.015	.151	.07	.024	.637	.544	.269	.217	.149	.055	.163	.055	.025
254	77 J-SJ	24	3	0	2	.621	.662	.296	.052	.017		1763	1687	.621	2003	1922	.662	.69	.597	.296	.208	.139	.052	.145	.037	.017
255	78 J-SJ	25	3	1	2	-.003	.009	.172	.013	.003		.069	-.007	-.003	.106	.025	.009	.441	.348	.172	.103	.035	.013	.115	.007	.003
256	79 J-SJ	10	1	1	2	.01	.02	.168	.013	.006		.103	.027	.01	.138	.057	.02	.433	.34	.168	.104	.035	.013	.12	.013	.006
257	80 J-SJ	9	1	1	2	.062	.061	.362	.009	.001		.246	.17	.062	.258	.177	.061	.825	.732	.362	.094	.025	.009	.109	.002	.001
258	81 J-SJ	7	1	1	2	.015	.019	.23	.039	.005		.118	.042	.015	.136	.055	.019	.558	.465	.23	.173	.104	.039	.118	.011	.005
259	82 J-SJ	37	4	1	2	.097	.103	.251	.221	-.287		.34	.264	.097	.38	.299	.103	.599	.506	.251	.662	.594	.221	-.018	-.133	-.287
260	83 J-SJ	11	2	1	2	.085	.085	.23	.032	.007		.306	.23	.085	.328	.247	.085	.557	.464	.23	.155	.086	.032	.122	.014	.007
261	84 J-SJ	27	3	0	2	.009	.015	.092	.632	.115		.1	.024	.009	.126	.045	.015	.279	.186	.092	1768	1699	.632	.359	.252	.115
262	85 J-SJ	31	4	1	2	.12	.166	.267	.12	.102		.402	.326	.12	.563	.482	.166	.633	.54	.267	.392	.323	.12	.331	.224	.102
263	86 J-SJ	3	0	0	2	.001	.008	.009	.006	.015		.078	.002	.001	.104	.023	.008	.111	.018	.009	.085	.017	.006	.14	.032	.015
264	87 J-SJ	40	4	0	2	.041	.058	.316	.028	0		.188	.112	.041	.251	.17	.058	.731	.638	.316	.144	.075	.028	.108	0	0
265	88 J-SJ	44	5	1	2	.021	.034	.073	.117	.072		.133	.057	.021	.179	.098	.034	.241	.148	.073	.383	.315	.117	.264	.157	.072
266	89 J-SJ	14	2	1	2	.002	.011	.206	.021	.01		.082	.006	.002	.114	.033	.011	.51	.417	.206	.124	.056	.021	.128	.021	.01
267	90 J-SJ	20	2	1	2	-.003	.006	.035	.013	.007		.068	-.008	-.003	.098	.017	.006	.165	.072	.035	.103	.035	.013	.123	.015	.007
268	91 J-SJ	56	6	0	2	.004	.231	.281	.646	.067		.086	.01	.004	.752	.671	.231	.662	.569	.281	1808	1739	.646	.254	.147	.067
269	92 J-SJ	45	5	0	2	.002	.005	.124	.118	.008		.081	.005	.002	.095	.014	.005	.344	.251	.124	.385	.316	.118	.125	.017	.008
270	93 J-SJ	14	2	1	2	.044	.072	.224	.035	.037		.195	.119	.044	.29	.209	.072	.546	.453	.224	.163	.094	.035	.189	.082	.037
271	94 J-SJ	49	5	0	2	.013	.022	.45	.184	.225		.112	.036	.013	.146	.065	.022	1002	.909	.45	.563	.494	.184	.6	.492	.225
272	95 J-SJ	35	4	0	2	.304	.411	.555	.764	.225		.902	.826	.304	1275	1194	.411	1215	1122	.555	2125	2057	.764	.6	.492	.225
273	96 J-SJ	51	6	1	2	.02	.024	.216	.019	.005		.13	.054	.02	.152	.071	.024	.529	.436	.216	.119	.051	.019	.119	.011	.005
274	97 J-SJ	38	4	0	2	.565	.615	.146	.456	.131		1.61	1534	.565	1867	1786	.615	.387	.294	.146	1295	1227	.456	.395	.287	.131
275	98 J-SJ	25	3	1	2	.057	.065	.4	.003	.006		.232	.156	.057	.268	.187	.065	.901	.808	.4	.075	.007	.003	.121	.013	.006
276	99 J-SJ	32	4	1	2	.01	.012	.12	.326	.062		.103	.027	.01	.117	.036	.012	.336	.243	.12	.945	.877	.326	.242	.135	.062
277	100 J-SJ	42	5	0	2	.35	.355	.377	.114	.125		1027	.951	.35	1111	1.03	.355	.854	.761	.377	.376	.307	.114	.381	.274	.125
278	101 J-SJ	31	4	1	2	-.002	.007	.595	.015	.007		.071	-.005	-.002	.1	.019	.007	1295	1202	.595	.11	.041	.015	.122	.014	.007
279	102 J-SJ	44	5	1	2	.082	.12	.31	.249	.134		.299	.223	.082	.429	.348	.12	.719	.626	.31	.737	.669	.249	.401	.293	.134
280	103 J-SJ	58	6	0	2	.018	.03	.083	.019	.008		.125	.049	.018	.167	.086	.03	.262	.169	.083	.12	.052	.019	.126	.018	.008
281	104 J-SJ	55	6	0	2	-.002	.007	.233	.203	.054		.071	-.005	-.002	.101	.02	.007	.565	.472	.233	.614	.546	.203	.226	.119	.054
282	105 J-SJ	35	4	0	2	.021	.031	.167	.024	.006		.133	.057	.021	.172	.091	.031	.431	.338	.167	.132	.063	.024	.12	.013	.006
283	106 J-SJ	4	0	0	2	.029	.032	.044	.005	-.004		.156	.08	.029	.173	.092	.032	.181	.088	.044	.083	.014	.005	.098	-.009	-.004
284	107 J-SJ	2.33	0	0	2	-.002	0	.058	.01	-.006		.07	-.006	-.002	.082	.001	0	.211	.118	.058	.096	.028	.01	.095	-.013	-.006
285	109 J-SJ	22	3	1	2	-.002	.003	.153	.147	.08		.071	-.005	-.002	.091	.01	.003	.402	.309	.153	.464	.396	.147	.282	.175	.08
286	1 ROU	33	4	1	3	.386	.309	.283	.079	-.003		1074	.963	.386	.789	.715	.309	.595	.501	.283	.374	.253	.079	.132	-.006	-.003
287	2 ROU	13	2	1	3	.261	.293	.153	.16	.027		.859	.796	.261	.752	.678	.293	.42	.317	.153	.632	.511	.16	.152	.06	.027
288	3 ROU	65	6	0	3	.037	.037	.406	.936	.508		.202	.091	.037	.159	.086	.037	.943	.84	.406	3117	2996	.936	1214	1122	.508
289	4 ROU	22	3	0	3	.008	.002	.15	.041	-.006		.131	.02	.008	.077	.004	.002	.413	.311	.15	.253	.132	.041	.126	-.012	-.006
290	5 ROU	24	3	0	3	.192	.072	.319	.017	-.006		.589	.478	.192	.239	.166	.072	.763	.661	.319	.175	.054	.017	.126	-.012	-.006
291	6 ROU	54	6	1	3	.008	.003	.173	.226	.014		.087	.023	.008	.079	.006	.003	.46	.358	.173	.844	.723	.226	.166	.028	.014
292	7 ROU	34	4	0	3	.101	.06	.24	.009	-.015		.363	.252	.101	.211	.138	.06	.6	.497	.24	.15	.029	.009	.108	-.029	-.015
293	8 ROU	67	6	1	3	.037	.018	.586	.08	.137		.202	.091	.037	.116	.042	.018	1314	1212	.586	.376	.255	.08	.395	.303	.137
294	9 ROU	21	3	1	3	.368	.329	.439	.018	.021		1027	.916	.368	.834	.761	.329	1012	.909	.439	.177	.056	.018	.139	.047	.021
295	10 ROU	27	3	1	3	.002	.002	.276	.008	.006		.115	.004	.002	.078	.005	.002	.674	.572	.276	.147	.026	.008	.105	.013	.006
296	11 ROU	30	3	0	3	.364	.377	.45	.041	.01		1018	.907	.364	.946	.873	.377	1033	.93	.45	.251	.13	.041	.113	.021	.01
297	12 ROU	62	6	0	3	-.003	.005	.658	.028	.06		.104	-.007	-.003	.085	.011	.005	1465	1362	.658	.211	.09	.028	.225	.133	.06
298	13 ROU	40	4	0	3	-.005	.004	.303	.061	.016		.099	-.012	-.005	.082	.009	.004	.73	.628	.303	.316	.195	.061	.127	.035	.016
299	14 ROU	29	3	0	3	.366	.234	.244	.012	.009		1023	.912	.366	.614	.541	.234	.608	.506	.244	.158	.037	.012	.111	.019	.009
300	15 ROU	26	3	0	3	.012	.022	.063	.254	.033		.141	.03	.012	.125	.051	.022	.232	.13	.063	.934	.813	.254	.164	.072	.033
301	16 ROU	61	6	1	3	.073	.105	1127	.007	.099		.286	.222	.073	.315	.242	.105	2434	2331	1127	.142	.021	.007	.31	.218	.099
302	17 ROU	23	3	1	3	.021	-.003	.096	.008	-.004		.163	.052	.021	.067	-.007	-.003	.301	.198	.096	.147	.026	.008	.083	-.009	-.004
303	18 ROU	25	3	1	3	-.01	-.007	.062	.004	-.006		.086	-.025	-.01	.057	-.016	-.007	.231	.128	.062	.134	.013	.004	.078	-.014	-.006
304	19 ROU	9	1	1	3	.106	.086	.13	.003	-.004		.376	.265	.106	.273	.2	.086	.372	.27	.13	.13	.009	.003	.082	-.01	-.004
305	20 ROU	58	6	0	3	-.005	.001	.318	.007	-.003		.098	-.013	-.005	.076	.002	.001	.761	.659	.318	.142	.021	.007	.084	-.008	-.003
306	21 ROU	26	3	1	3	-.007	.002	.146	.036	.006		.095	-.016	-.007	.079	.005	.002	.404	.302	.146	.235	.114	.036	.105	.013	.006
307	22 ROU	29	3	0	3	.055	.072	.216	0	.017		.23	.167	.055	.239	.165	.072	.55	.447	.216	.122	.001	0	.13	.038	.017
308	23 ROU	25	3	1	3	-.001	.004	.303	.007	.001		.108	-.003	-.001	.082	.009	.004	.729	.627	.303	.143	.022	.007	.094	.002	.001
309	24 ROU	49	5	0	3	.048	.013	.223	.036	.113		.23	.119	.048	.102	.029	.013	.564	.461	.223	.235	.114	.036	.34	.248	.113
310	25 ROU	61	6	1	3	.35	.359	.507	.52	.047		.984	.873	.35	.903	.83	.359	1151	1049	.507	1786	1665	.52	.196	.104	.047
311	26 ROU	45	5	1	3	.006	.004	.261	.002	-.004		.126	.015	.006	.082	.009	.004	.642	.539	.261	.126	.005	.002	.083	-.009	-.004
312	27 ROU	44	5	0	3	.029	.046	.055	.244	.01		.184	.073	.029	.181	.107	.046	.217	.114	.055	.902	.781	.244	.114	.022	.01
313	28 ROU	27	3	1	3	.017	.022	.277	.068	.026		.154	.043	.017	.125	.052	.022	.676	.574	.277	.339	.218	.068	.149	.057	.026
314	29 ROU	27	3	1	3	-.003	.009	.122	.135	.005		.103	-.008	-.003	.093	.02	.009	.355	.252	.122	.554	.433	.135	.104	.012	.005
315	30 ROU	44	5	0	3	.021	.022	.36	.264	.153		.163	.052	.021	.124	.05	.022	.847	.745	.36	.965	.844	.264	.43	.338	.153
316	31 ROU	26	3	1	3	.034	.03	.225	.19	.089		.197	.086	.034	.142	.068	.03	.567	.465	.225	.728	.607	.19	.287	.195	.089
317	32 ROU	15	2	1	3	.016	.02	.101	.011	.084		.152	.041	.016	.12	.046	.02	.311	.208	.101	.157	.036	.011	.277	.185	.084
318	33 ROU	15	2	1	3	.069	.043	.054	.104	.023		.283	.172	.069	.172	.098	.043	.214	.111	.054	.452	.331	.104	.143	.051	.023
319	34 ROU	38	4	1	3	.171	.175	.269	.485	.08		.537	.426	.171	.478	.404	.175	.658	.556	.269	1674	1553	.485	.268	.176	.08
320	35 ROU	21	3	1	3	-.005	-.002	.128	.126	.019		.1	-.011	-.005	.069	-.005	-.002	.368	.266	.128	.523	.402	.126	.134	.042	.019
321	36 ROU	45	5	1	3	-.003	-.001	.363	.042	.12		.103	-.008	-.003	.071	-.002	-.001	.853	.751	.363	.254	.133	.042	.358	.266	.12
322	37 ROU	11	2	0	3	-.006	-.002	.066	-.004	-.003		.095	-.016	-.006	.068	-.006	-.002	.239	.136	.066	.109	-.012	-.004	.085	-.007	-.003
323	38 ROU	48	5	0	3	.083	.064	.216	.037	.124		.317	.206	.083	.22	.147	.064	.549	.446	.216	.239	.118	.037	.365	.273	.124
324	39 ROU	34	4	0	3	.03	.032	.128	.05	.012		.187	.076	.03	.148	.074	.032	.367	.264	.128	.281	.16	.05	.119	.027	.012
325	40 ROU	54	6	0	3	.015	.01	.294	.018	.094		.15	.039	.015	.097	.024	.01	.71	.608	.294	.18	.059	.018	.298	.206	.094
326	41 ROU	32	4	0	3	.558	.3	.462	.005	.028		1507	1348	.558	.793	.709	.3	1075	.975	.462	.151	.017	.005	.131	.05	.028
327	42 ROU	30	3	0	3	.325	.246	.44	.06	.01		.944	.785	.325	.663	.58	.246	1028	.928	.44	.322	.188	.06	.099	.018	.01
328	43 ROU	40	4	1	3	.073	.014	.185	.043	.016		.336	.177	.073	.116	.033	.014	.489	.39	.185	.267	.132	.043	.11	.029	.016
329	44 ROU	30	3	1	3	.012	.011	.184	.164	.037		.112	.036	.012	.11	.027	.011	.488	.388	.184	.645	.51	.164	.148	.067	.037
330	45 ROU	44	5	0	3	.162	.065	.227	.105	.056		.55	.391	.162	.237	.154	.065	.577	.478	.227	.462	.328	.105	.183	.101	.056
331	46 ROU	29	3	0	3	.061	.037	.222	.055	.017		.305	.146	.061	.171	.087	.037	.568	.469	.222	.305	.171	.055	.112	.031	.017
332	47 ROU	44	5	1	3	.094	.029	.489	.044	.019		.385	.226	.094	.152	.068	.029	1131	1032	.489	.272	.137	.044	.116	.034	.019
333	48 ROU	48	5	1	3	.127	.043	.213	.018	-.016		.466	.307	.127	.186	.102	.043	.548	.449	.213	.191	.057	.018	.105	-.032	-.016
334	49 ROU	10	1	1	3	.206	.102	.91	.037	.006		.705	.629	.206	.323	.24	.102	2019	1919	.91	.249	.114	.037	.093	.012	.006
335	50 ROU	14	2	1	3	.052	.016	.61	.009	.002		.236	.16	.052	.121	.037	.016	1386	1286	.61	.164	.029	.009	.085	.004	.002
336	51 ROU	62	6	1	3	.041	.002	.249	.03	.01		.258	.099	.041	.088	.005	.002	.625	.525	.249	.227	.092	.03	.099	.017	.01
337	52 ROU	41	5	0	3	.175	.155	.095	.017	.01		.581	.422	.175	.448	.365	.155	.3	.201	.095	.187	.053	.017	.1	.018	.01
338	53 ROU	31	4	0	3	.017	.013	.304	.007	.173		.199	.04	.017	.114	.03	.013	.741	.642	.304	.156	.021	.007	.391	.309	.173
339	54 ROU	55	6	0	3	.026	-.003	.214	.015	-.005		.221	.062	.026	.076	-.007	-.003	.55	.45	.214	.18	.046	.015	.073	-.009	-.005
340	55 ROU	38	4	0	3	.505	.465	.645	.044	.011		1378	1219	.505	1182	1098	.465	1461	1361	.645	.271	.136	.044	.101	.019	.011
341	56 ROU	30	3	0	3	.025	.003	.084	.004	.01		.218	.059	.025	.09	.006	.003	.276	.176	.084	.147	.012	.004	.099	.018	.01
342	57 ROU	59	6	0	3	.115	.106	.24	.03	.015		.438	.279	.115	.333	.25	.106	.606	.507	.24	.226	.092	.03	.108	.027	.015
343	58 ROU	64	6	0	3	.396	.488	.73	.39	.075		1114	.955	.396	1236	1152	.488	1.64	1541	.73	1348	1213	.39	.216	.135	.075
344	59 ROU	60	6	1	3	.99	.802	.727	.035	.01		2.55	2391	.99	1976	1893	.802	1633	1533	.727	.243	.108	.035	.099	.017	.01
345	60 ROU	66	6	0	3	.323	.385	.216	.075	.016		.938	.779	.323	.993	.909	.385	.555	.456	.216	.366	.232	.075	.111	.029	.016
346	61 ROU	51	6	0	3	.008	-.001	.16	.092	.033		.179	.02	.008	.081	-.002	-.001	.436	.337	.16	.421	.286	.092	.141	.059	.033
347	62 ROU	43	5	0	3	.741	.682	.259	.039	.012		1947	1788	.741	1692	1609	.682	.646	.547	.259	.254	.12	.039	.102	.021	.012
348	63 ROU	63	6	0	3	.024	.013	.383	.357	.008		.216	.057	.024	.115	.031	.013	.907	.807	.383	1243	1109	.357	.096	.015	.008
349	64 ROU	12	2	1	3	.043	-.003	.493	.013	.029		.262	.103	.043	.076	-.008	-.003	1139	1.04	.493	.174	.039	.013	.133	.051	.029
350	65 ROU	9	1	1	3	.093	.053	.466	-.003	-.005		.384	.225	.093	.209	.125	.053	1082	.982	.466	.124	-.01	-.003	.073	-.008	-.005
351	66 ROU	13	2	0	3	.165	.124	.072	-.001	-.006		.557	.398	.165	.375	.292	.124	.25	.151	.072	.13	-.004	-.001	.07	-.011	-.006
352	67 ROU	19	2	1	3	.055	.033	.115	-.002	-.003		.291	.132	.055	.16	.077	.033	.342	.243	.115	.129	-.006	-.002	.076	-.005	-.003
353	68 ROU	51	6	0	3	.053	.043	.096	.012	-.004		.287	.128	.053	.185	.101	.043	.303	.203	.096	.118	.034	.012	.074	-.007	-.004
354	69 ROU	44	5	1	3	.152	.093	.42	.069	.004		.525	.366	.152	.303	.22	.093	.985	.886	.42	.349	.214	.069	.088	.007	.004
355	70 ROU	37	4	1	3	.238	.228	.136	.107	.012		.734	.575	.238	.622	.538	.228	.385	.286	.136	.467	.332	.107	.104	.022	.012
356	71 ROU	20	2	1	3	.044	.014	.237	.008	.008		.266	.107	.044	.116	.032	.014	.598	.499	.237	.158	.024	.008	.095	.014	.008
357	72 ROU	34	4	1	3	.036	.011	.102	-.007	-.002		.246	.087	.036	.11	.026	.011	.314	.214	.102	.113	-.021	-.007	.079	-.003	-.002
358	73 ROU	14	2	1	3	.041	.016	.032	.001	-.001		.257	.098	.041	.121	.038	.016	.166	.067	.032	.139	.004	.001	.08	-.002	-.001
359	74 ROU	15	2	1	3	.02	.008	.134	-.001	-.003		.206	.047	.02	.102	.018	.008	.382	.283	.134	.13	-.004	-.001	.077	-.005	-.003
360	75 ROU	30	3	0	3	.267	.31	.424	.039	.017		.803	.644	.267	.815	.731	.31	.993	.894	.424	.257	.122	.039	.111	.03	.017
361	76 ROU	19	2	1	3	.02	.005	.712	.02	.042		.207	.048	.02	.095	.011	.005	1601	1501	.712	.197	.062	.02	.157	.075	.042
362	77 ROU	18	2	0	3	.007	-.002	.158	.001	.015		.175	.016	.007	.08	-.004	-.002	.432	.333	.158	.087	.003	.001	.108	.027	.015
363	78 ROU	70	6	0	3	.629	.493	.572	.104	.139		1678	1519	.629	1247	1164	.493	1305	1206	.572	.457	.323	.104	.331	.25	.139
364	79 ROU	35	4	0	3	.143	.155	.352	.03	.008		.504	.345	.143	.449	.365	.155	.843	.743	.352	.228	.093	.03	.096	.015	.008
365	80 ROU	14	2	0	3	.031	.001	.026	.029	.008		.234	.075	.031	.086	.002	.001	.155	.055	.026	.225	.091	.029	.095	.014	.008
366	81 ROU	67	6	0	3	.012	.008	.394	.443	.146		.113	.031	.012	.109	.02	.008	1037	.941	.394	1239	1146	.443	.398	.312	.146
367	82 ROU	38	4	0	3	.266	.255	.219	.018	.015		.747	.665	.266	.719	.63	.255	.619	.524	.219	.139	.046	.018	.119	.033	.015
368	83 ROU	18	2	1	3	.058	.042	.935	.068	.045		.227	.145	.058	.192	.103	.042	2327	2232	.935	.268	.175	.068	.183	.097	.045
369	84 ROU	36	4	1	3	.056	.054	.559	.063	.016		.223	.141	.056	.224	.135	.054	1.43	1334	.559	.255	.162	.063	.121	.035	.016
370	85 ROU	39	4	1	3	.042	.033	.646	.002	.011		.187	.104	.042	.17	.081	.033	1638	1542	.646	.098	.005	.002	.109	.023	.011
371	86 ROU	11	2	1	3	.045	.029	.033	.039	.003		.196	.114	.045	.161	.072	.029	.175	.079	.033	.195	.102	.039	.092	.006	.003
372	87 ROU	22	3	0	3	.031	.015	.28	.029	.008		.16	.077	.031	.127	.038	.015	.764	.669	.28	.167	.074	.029	.103	.017	.008
373	88 ROU	45	5	0	3	.584	.399	.375	.015	.015		1544	1461	.584	1075	.986	.399	.99	.894	.375	.132	.039	.015	.119	.033	.015
374	89 ROU	22	3	1	3	.43	.32	.363	.021	-.001		1159	1076	.43	.881	.792	.32	.963	.867	.363	.147	.054	.021	.083	-.003	-.001
375	90 ROU	71	6	0	3	.096	.049	.263	.329	.082		.324	.241	.096	.211	.122	.049	.723	.627	.263	.943	.85	.329	.261	.175	.082
376	91 ROU	23	3	0	3	.229	.127	.146	.055	.005		.657	.574	.229	.403	.314	.127	.443	.347	.146	.235	.142	.055	.097	.011	.005
377	92 ROU	48	5	1	3	.014	.004	.483	.021	.006		.119	.036	.014	.099	.01	.004	1248	1153	.483	.146	.053	.021	.1	.014	.006
378	93 SAP	26	3	1	3	.089	.055	.48	.024	0		.306	.223	.089	.225	.136	.055	1.24	1145	.48	.156	.063	.024	.086	0	0
379	94 SAP	28	3	0	3	.009	-.003	.521	.136	.018		.104	.022	.009	.081	-.008	-.003	1339	1243	.521	.445	.352	.136	.125	.039	.018
380	95 SAP	44	5	0	3	.009	.003	.449	.084	.013		.105	.023	.009	.097	.008	.003	1168	1073	.449	.309	.216	.084	.114	.028	.013
381	96 SAP	48	5	0	3	.241	.198	.078	.046	.068		.685	.602	.241	.58	.491	.198	.281	.186	.078	.211	.118	.046	.231	.145	.068
382	97 SAP	60	6	0	3	.039	.016	.201	.318	.078		.18	.097	.039	.13	.041	.016	.576	.48	.201	.915	.822	.318	.253	.167	.078
383	98 SAP	22	3	0	3	.087	.094	.111	.022	.003		.3	.218	.087	.322	.233	.094	.361	.265	.111	.149	.056	.022	.093	.007	.003
384	99 SAP	15	2	0	3	.032	.018	.181	.681	.422		.162	.08	.032	.135	.046	.018	.527	.432	.181	1853	1.76	.681	.99	.904	.422
385	100 SAP	50	5	1	3	.147	.122	.678	.126	.011		.452	.369	.147	.39	.301	.122	1715	1619	.678	.419	.326	.126	.11	.024	.011
386	101 SAP	38	4	0	3	.085	.019	.458	.026	.002		.294	.212	.085	.137	.048	.019	1188	1093	.458	.16	.067	.026	.09	.004	.002
387	102 SAP	50	5	1	3	.028	.008	.424	.056	.013		.152	.069	.028	.108	.019	.008	1107	1012	.424	.238	.145	.056	.114	.028	.013
388	103 SAP	41	5	0	3	.122	.095	.177	.253	.006		.388	.306	.122	.324	.235	.095	.518	.423	.177	.746	.653	.253	.098	.012	.006
389	104 SAP	60	6	0	3	.019	-.002	.278	.124	.014		.13	.048	.019	.085	-.004	-.002	.759	.664	.278	.413	.32	.124	.115	.029	.014
390	105 SAP	56	6	0	3	.01	-.006	.428	.159	.103		.109	.026	.01	.075	-.014	-.006	1117	1021	.428	.504	.411	.159	.307	.221	.103
391	106 SAP	48	5	0	3	.049	.016	.371	.123	.003		.205	.122	.049	.129	.04	.016	.981	.885	.371	.411	.318	.123	.093	.007	.003
392	107 SAP	23	3	1	3	.817	.687	.792	.065	.008		2129	2046	.817	1789	1.7	.687	1987	1892	.792	.26	.167	.065	.103	.017	.008
393	108 SAP	51	6	1	3	.021	-.002	.443	.185	.013		.136	.054	.021	.085	-.004	-.002	1153	1058	.443	.571	.478	.185	.114	.028	.013
394	109 SAP	41	5	1	3	.122	.08	.213	.228	.017		.389	.306	.122	.288	.199	.08	.605	.509	.213	.682	.589	.228	.122	.036	.017
395	110 SAP	50	5	0	3	.01	-.004	.461	.5	.057		.107	.025	.01	.078	-.011	-.004	1197	1101	.461	1386	1293	.5	.207	.121	.057
396	111 SAP	30	3	0	3	.046	.021	.183	.013	.026		.198	.115	.046	.14	.051	.021	.533	.437	.183	.126	.033	.013	.143	.057	.026
397	112 SAP	20	2	1	3	.021	.001	.36	.016	.002		.136	.054	.021	.092	.003	.001	.955	.86	.36	.133	.04	.016	.091	.005	.002
398	113 SAP	60	6	0	3	.016	.003	.109	.057	.058		.123	.041	.016	.097	.008	.003	.355	.26	.109	.24	.147	.057	.211	.125	.058
399	114 SAP	24	3	0	3	.542	.426	.574	.129	.045		1.44	1358	.542	1144	1055	.426	1466	1.37	.574	.427	.334	.129	.182	.096	.045
400	115 SAP	38	4	0	3	.049	.01	.113	.272	.029		.204	.122	.049	.113	.024	.01	.365	.269	.113	.797	.704	.272	.147	.061	.029
401	116 SAP	51	6	0	3	.055	.032	.097	.001	.008		.221	.139	.055	.168	.079	.032	.326	.231	.097	.086	.003	.001	.104	.018	.008
402	117 SAP	63	6	0	3	.147	.195	.334	.4	.062		.45	.368	.147	.571	.482	.195	.894	.798	.334	1127	1034	.4	.219	.133	.062
403	118 SAP	45	5	0	3	.293	.229	.429	.087	.064		.817	.735	.293	.656	.567	.229	1119	1024	.429	.317	.224	.087	.224	.138	.064
404	120 SAP	55	6	0	3	.514	.419	.487	.137	.041		1369	1286	.514	1125	1036	.419	1258	1163	.487	.446	.353	.137	.174	.088	.041
405	121 SAP	62	6	0	3	.148	.107	.147	.572	.102		.453	.37	.148	.355	.266	.107	.447	.351	.147	1573	1.48	.572	.306	.22	.102
406	122 SAP	24	3	0	3	.123	.134	.341	.213	.031		.419	.309	.123	.422	.322	.134	.972	.875	.341	.586	.498	.213	.153	.065	.031
407	123 SAP	58	6	0	3	.481	.312	.254	.393	.22		1316	1205	.481	.852	.752	.312	.75	.652	.254	1007	.92	.393	.55	.462	.22
408	124 SAP	42	5	1	3	.61	.439	.257	.155	.073		1.64	1.53	.61	1156	1057	.439	.759	.661	.257	.451	.363	.155	.242	.154	.073
409	125 SAP	38	4	1	3	.139	.1	.114	.514	.033		.458	.347	.139	.341	.242	.1	.391	.293	.114	1.29	1202	.514	.157	.069	.033
410	126 SAP	13	2	0	3	.3	.233	.232	.319	.111		.863	.753	.3	.661	.562	.233	.693	.595	.232	.833	.746	.319	.322	.234	.111
411	127 SAP	42	5	1	3	.195	.15	.113	.362	.045		.6	.49	.195	.46	.361	.15	.389	.291	.113	.935	.848	.362	.183	.095	.045
412	128 SAP	10	1	1	3	-.004	-.009	.049	.006	0		.1	-.011	-.004	.078	-.021	-.009	.222	.125	.049	.1	.013	.006	.089	.001	0
413	129 SAP	33	4	1	3	.586	.32	.402	.047	.024		1578	1468	.586	.871	.772	.32	1129	1031	.402	.197	.11	.047	.138	.05	.024
414	130 SAP	10	1	1	3	-.011	-.013	.032	-.002	-.003		.083	-.028	-.011	.068	-.032	-.013	.18	.082	.032	.082	-.006	-.002	.082	-.006	-.003
415	131 SAP	33	4	1	3	-.006	-.014	.487	.021	0		.097	-.014	-.006	.066	-.034	-.014	1347	1.25	.487	.136	.049	.021	.087	-.001	0
416	132 SAP	58	6	0	3	0	-.007	.206	.054	.013		.112	.001	0	.083	-.017	-.007	.627	.529	.206	.215	.127	.054	.115	.027	.013
417	133 SAP	50	5	0	3	.007	-.001	.17	.152	.004		.098	.022	.007	.098	-.001	-.001	.533	.436	.17	.442	.355	.152	.096	.008	.004
418	134 SAP	33	4	0	3	.219	.091	.172	.017	0		.66	.549	.219	.32	.22	.091	.539	.441	.172	.127	.04	.017	.089	.001	0
419	135 SAP	39	4	0	3	.197	.175	.179	.033	.001		.605	.494	.197	.522	.422	.175	.557	.459	.179	.165	.077	.033	.091	.003	.001
420	136 SAP	36	4	1	3	0	-.008	.141	.069	.004		.111	0	0	.08	-.019	-.008	.46	.363	.141	.248	.16	.069	.097	.009	.004
421	137 SAP	25	3	1	3	-.009	-.004	.326	.024	.002		.089	-.021	-.009	.089	-.011	-.004	.935	.838	.326	.144	.057	.024	.092	.004	.002
422	138 SAP	45	5	1	3	.09	.139	.728	.203	.035		.336	.226	.09	.434	.334	.139	1968	1.87	.728	.563	.475	.203	.162	.074	.035
423	139 SAP	32	4	1	3	.169	.178	.364	.111	.003		.533	.423	.169	.527	.428	.178	1033	.936	.364	.347	.26	.111	.095	.007	.003
424	140 SAP	44	5	0	3	-.009	-.015	.067	.031	-.001		.089	-.021	-.009	.062	-.037	-.015	.269	.171	.067	.16	.073	.031	.086	-.002	-.001
425	141 SAP	54	6	0	3	.792	.747	.583	.194	.019		2096	1986	.792	1.9	1.8	.747	1595	1497	.583	.541	.453	.194	.127	.039	.019
426	142 SAP	24	3	1	3	.215	.205	.635	.104	.019		.65	.54	.215	.593	.494	.205	1.73	1632	.635	.331	.244	.104	.128	.04	.019
427	143 SAP	53	6	0	3	.632	.525	.11	.083	.006		1694	1584	.632	1363	1264	.525	.381	.283	.11	.281	.193	.083	.101	.013	.006
428	144 SAP	16	2	0	3	-.006	-.012	.055	.184	.055		.096	-.014	-.006	.071	-.029	-.012	.24	.142	.055	.517	.43	.184	.203	.115	.055
429	145 SAP	26	3	0	3	.035	.017	.122	.029	-.005		.199	.089	.035	.141	.042	.017	.412	.314	.122	.155	.067	.029	.077	-.011	-.005
430	146 SAP	32	4	1	3	.008	.003	.087	.052	.028		.132	.021	.008	.108	.008	.003	.32	.222	.087	.209	.122	.052	.146	.058	.028
431	147 SAP	10	1	0	3	.275	.233	.098	.311	.045		.799	.689	.275	.662	.562	.233	.349	.252	.098	.816	.728	.311	.183	.095	.045
432	148 SAP	43	5	0	3	.013	.006	.256	.009	.004		.116	.04	.013	.114	.015	.006	.756	.658	.256	.109	.021	.009	.096	.008	.004
433	149 SAP	29	3	0	3	.883	.809	.329	.05	.013		2324	2214	.883	2049	1.95	.809	.943	.846	.329	.204	.116	.05	.116	.028	.013
434	150 SAP	32	4	0	3	.017	.007	.214	.039	0		.153	.042	.017	.117	.018	.007	.647	.55	.214	.178	.091	.039	.089	.001	0
435	151 SAP	14	2	0	3	.059	.047	.036	.01	-.008		.259	.149	.059	.212	.112	.047	.191	.093	.036	.112	.024	.01	.072	-.016	-.008
436	152 SAP	10	1	1	3	.332	.256	.12	.054	-.005		.942	.832	.332	.716	.617	.256	.405	.307	.12	.215	.127	.054	.079	-.009	-.005
437	153 SAP	43	5	0	3	.121	.03	.247	.148	.003		.415	.304	.121	.171	.072	.03	.732	.635	.247	.434	.346	.148	.095	.007	.003
438	154 SAP	56	6	0	3	.18	.226	.369	.26	.151		.562	.451	.18	.643	.543	.226	1044	.947	.369	.695	.607	.26	.405	.317	.151
439	155 SAP	32	4	0	3	.003	-.006	.126	.245	.025		.119	.008	.003	.085	-.014	-.006	.421	.323	.126	.66	.572	.245	.14	.052	.025
440	156 SAP	40	4	0	3	.578	.455	.224	.445	.3		1558	1448	.578	1195	1096	.455	.672	.575	.224	1129	1041	.445	.719	.631	.3
441	157 SAP	18	2	0	3	.193	.182	.293	.038	.008		.593	.483	.193	.537	.437	.182	.85	.752	.293	.177	.089	.038	.105	.017	.008
442	158 SAP	49	5	0	3	.113	.075	.563	.795	.623		.394	.284	.113	.281	.182	.075	1543	1446	.563	1949	1861	.795	1396	1308	.623
443	159 SAP	27	3	0	3	.014	.012	.289	.457	.091		.146	.035	.014	.128	.028	.012	.84	.743	.289	1158	1.07	.457	.28	.192	.091
444	160 SAP	44	5	1	3	.098	.067	.404	.458	.074		.356	.245	.098	.261	.162	.067	1134	1037	.404	1.16	1072	.458	.243	.155	.074
445	161 SAP	41	5	0	3	.001	-.005	.118	.295	.036		.114	.004	.001	.088	-.011	-.005	.399	.302	.118	.778	.691	.295	.164	.076	.036
446	162 SAP	40	4	0	3	.544	.538	.436	.698	.335		1582	1477	.544	1564	1472	.538	1155	1055	.436	2288	2.2	.698	.73	.646	.335
447	163 SAP	39	4	0	3	.293	.255	.055	.016	.006		.9	.795	.293	.791	.699	.255	.234	.133	.055	.137	.049	.016	.095	.011	.006
448	164 SAP	31	4	1	3	.123	.068	.13	.057	.011		.439	.334	.123	.278	.186	.068	.416	.315	.13	.266	.178	.057	.106	.022	.011
449	165 SAP	52	6	0	3	.146	.175	.443	.2	.033		.503	.398	.146	.571	.479	.175	1172	1071	.443	.718	.63	.2	.148	.064	.033
450	166 SAP	31	4	0	3	.15	.123	.209	.135	.035		.513	.408	.15	.429	.337	.123	.605	.504	.209	.514	.427	.135	.151	.067	.035
451	167 SAP	42	5	0	3	.011	.007	.102	.024	.006		.136	.031	.011	.11	.018	.007	.347	.246	.102	.162	.074	.024	.095	.011	.006
452	168 SAP	23	3	0	3	.004	.001	.149	.018	.013		.115	.01	.004	.094	.002	.001	.46	.359	.149	.144	.057	.018	.109	.025	.013
453	169 SAP	44	5	0	3	.009	.007	.056	.017	.008		.13	.025	.009	.111	.019	.007	.237	.136	.056	.142	.055	.017	.1	.016	.008
454	170 SAP	35	4	0	3	.094	.078	.163	.027	.014		.362	.257	.094	.305	.213	.078	.496	.395	.163	.172	.084	.027	.111	.027	.014
455	171 SAP	44	5	0	3	.001	-.007	.608	.035	.018		.107	.002	.001	.073	-.019	-.007	1572	1471	.608	.197	.11	.035	.119	.035	.018
456	172 SAP	37	4	1	3	.26	.212	.367	.136	.007		.811	.706	.26	.673	.581	.212	.989	.888	.367	.517	.43	.136	.097	.013	.007
457	173 SAP	17	2	0	3	.416	.28	.248	.022	.01		1234	1129	.416	.859	.767	.28	.7	.599	.248	.155	.068	.022	.104	.02	.01
458	174 ARA	9	1	1	3	.121	.113	.033	.033	-.003		.434	.329	.121	.403	.311	.113	.181	.08	.033	.19	.103	.033	.077	-.007	-.003
459	175 ARA	44	5	0	3	.427	.479	.456	.235	.069		1264	1159	.427	1403	1311	.479	1204	1103	.456	.827	.74	.235	.217	.133	.069
460	176 ARA	51	6	0	3	.054	.04	.103	.578	.011		.251	.146	.054	.202	.11	.04	.35	.249	.103	1.91	1823	.578	.105	.021	.011
461	177 ARA	23	3	1	3	.685	.523	.387	.082	.008		1965	1.86	.685	1523	1431	.523	1037	.936	.387	.345	.258	.082	.099	.015	.008
462	178 ARA	68	6	0	3	.012	0	.301	.104	.039		.137	.032	.012	.093	.001	0	.827	.727	.301	.416	.328	.104	.159	.075	.039
463	179 ARA	21	3	0	3	.075	.096	.459	.05	.027		.309	.204	.075	.354	.262	.096	1.21	1.11	.459	.245	.158	.05	.136	.052	.027
464	180 ARA	16	2	0	3	.039	.035	.225	.044	-.003		.21	.105	.039	.189	.097	.035	.644	.544	.225	.225	.138	.044	.078	-.006	-.003
465	181 ARA	32	4	0	3	-.001	-.005	.447	.041	.012		.102	-.003	-.001	.079	-.013	-.005	1182	1081	.447	.218	.131	.041	.108	.024	.012
466	182 ARA	32	4	0	3	.057	.058	.211	.031	.005		.26	.155	.057	.25	.158	.058	.61	.51	.211	.184	.097	.031	.094	.01	.005
467	183 ARA	45	5	1	3	.016	.02	.323	.117	.012		.15	.045	.016	.146	.054	.02	.882	.782	.323	.457	.369	.117	.107	.023	.012
468	184 ARA	52	6	1	3	.504	.489	.611	.019	.022		1473	1368	.504	1432	1.34	.489	1577	1477	.611	.146	.059	.019	.127	.043	.022
469	185 ARA	55	6	0	3	-.003	.005	.062	.001	-.003		.098	-.007	-.003	.105	.013	.005	.25	.149	.062	.091	.003	.001	.077	-.007	-.003
470	186 ARA	12	2	1	3	-.002	.01	.101	.014	.007		.1	-.005	-.002	.119	.027	.01	.345	.245	.101	.133	.045	.014	.097	.013	.007
471	187 ARA	30	3	1	3	.146	.183	.6	.028	.016		.502	.397	.146	.593	.501	.183	1551	1451	.6	.175	.088	.028	.114	.03	.016
472	188 ARA	28	3	1	3	.067	.058	.066	.017	-.003		.287	.182	.067	.251	.159	.058	.26	.16	.066	.142	.054	.017	.078	-.006	-.003
473	189 ARA	18	2	1	3	.004	.013	.246	.171	.044		.115	.01	.004	.127	.035	.013	.696	.596	.246	.626	.538	.171	.17	.086	.044
474	190 ARA	12	2	1	3	.231	.264	.117	.01	.004		.732	.627	.231	.814	.722	.264	.384	.284	.117	.119	.032	.01	.092	.008	.004
475	192 ARA	65	6	1	3	.062	.067	.745	.06	.02		.272	.167	.062	.276	.184	.067	1902	1802	.745	.276	.188	.06	.122	.038	.02
476	193 ARA	53	6	1	3	.269	.266	.522	.067	.005		.837	.732	.269	.82	.728	.266	1364	1263	.522	.298	.211	.067	.094	.01	.005
477	194 ARA	50	5	0	3	.056	.031	.314	.016	0		.257	.152	.056	.178	.086	.031	.859	.759	.314	.137	.049	.016	.083	-.001	0
478	195 ARA	53	6	0	3	.341	.293	.155	.285	.109		1031	.926	.341	.893	.801	.293	.476	.375	.155	.985	.898	.285	.294	.21	.109
479	196 ARA	45	5	0	3	-.002	-.002	.127	.042	.012		.1	-.005	-.002	.087	-.005	-.002	.407	.307	.127	.221	.133	.042	.107	.023	.012
480	197 ARA	26	3	1	3	.484	.475	.468	.022	.015		1419	1314	.484	1392	1.3	.475	1232	1131	.468	.157	.07	.022	.113	.029	.015
481	198 ARA	46	5	1	3	.008	.006	.354	.107	.007		.127	.022	.008	.109	.017	.006	.958	.857	.354	.423	.336	.107	.098	.014	.007
482	199 ARA	36	4	1	3	.127	.128	.592	.061	.01		.449	.344	.127	.444	.352	.128	1532	1432	.592	.281	.193	.061	.103	.019	.01
483	200 ARA	3	0	0	3	.161	.189	.211	.005	-.005		.544	.439	.161	.608	.516	.189	.612	.511	.211	.102	.014	.005	.075	-.009	-.005
484	201 ARA	13	2	1	3	.078	.074	.098	.037	.003		.316	.211	.078	.296	.204	.074	.337	.236	.098	.205	.117	.037	.089	.005	.003
485	202 ARA	10	1	1	3	.17	.155	.067	.011	0		.567	.462	.17	.518	.426	.155	.262	.162	.067	.122	.035	.011	.084	0	0
486	203 ARA	51	6	0	3	.014	.027	.283	.124	.019		.139	.039	.014	.154	.07	.027	.763	.667	.283	.459	.383	.124	.197	.038	.019
487	204 ARA	16	2	0	3	.305	.319	.375	.024	-.015		.955	.855	.305	.918	.835	.319	.979	.883	.375	.151	.075	.024	.129	-.03	-.015
488	205 ARA	5	0	0	3	.028	.02	.171	.018	-.036		.18	.08	.028	.135	.052	.02	.498	.402	.171	.132	.056	.018	.086	-.073	-.036
489	206 ARA	29	3	1	3	.007	.009	.116	.021	-.027		.119	.019	.007	.107	.024	.009	.37	.274	.116	.14	.064	.021	.105	-.054	-.027
490	207 ARA	12	2	1	3	.756	.603	.309	.042	-.031		2216	2116	.756	1662	1578	.603	.822	.726	.309	.207	.131	.042	.096	-.063	-.031
491	208 ARA	51	6	1	3	.215	.227	.508	.055	-.032		.702	.602	.215	.677	.593	.227	1292	1196	.508	.247	.171	.055	.094	-.065	-.032
492	209 ARA	47	5	0	3	.01	.005	.397	.048	-.03		.127	.027	.01	.097	.014	.005	1.03	.934	.397	.226	.15	.048	.099	-.06	-.03
493	210 ARA	51	6	0	3	.056	.043	.466	.084	-.01		.258	.158	.056	.195	.112	.043	1193	1097	.466	.335	.259	.084	.138	-.021	-.01
494	211 ARA	34	4	0	3	.153	.14	.382	.083	-.029		.529	.429	.153	.45	.367	.14	.995	.899	.382	.334	.258	.083	.1	-.059	-.029
495	212 ARA	33	4	1	3	.031	.109	.494	.059	-.045		.188	.088	.031	.369	.285	.109	1259	1163	.494	.259	.183	.059	.068	-.091	-.045
496	213 ARA	11	2	0	3	.203	.256	.448	.05	-.045		.669	.569	.203	.753	.67	.256	1151	1055	.448	.232	.156	.05	.068	-.091	-.045
497	214 ARA	9	1	0	3	-.006	-.007	.047	.01	-.045		.084	-.016	-.006	.066	-.017	-.007	.208	.112	.047	.108	.032	.01	.068	-.091	-.045
498	215 ARA	9	1	0	3	.009	.003	.099	.009	-.045		.124	.024	.009	.09	.007	.003	.33	.234	.099	.104	.028	.009	.067	-.092	-.045
499	216 ARA	49	5	1	3	.011	.005	.453	.02	-.045		.131	.031	.011	.096	.012	.005	1163	1067	.453	.138	.062	.02	.068	-.091	-.045
500	217 ARA	30	3	0	3	.053	.04	.086	.009	-.044		.248	.148	.053	.189	.105	.04	.298	.202	.086	.104	.028	.009	.069	-.09	-.044
501	218 ARA	11	2	0	3	.026	.015	.28	.044	-.043		.173	.073	.026	.123	.04	.015	.754	.658	.28	.214	.138	.044	.071	-.088	-.043
502	219 ARA	31	4	0	3	.015	.018	.48	.024	-.029		.142	.042	.015	.13	.046	.018	1224	1128	.48	.151	.075	.024	.099	-.06	-.029
503	220 ARA	59	6	0	3	.09	.147	.292	.139	.004		.352	.252	.09	.467	.384	.147	.783	.687	.292	.505	.429	.139	.166	.007	.004
504	221 ARA	11	2	1	3	.312	.281	.029	.003	-.038		.974	.874	.312	.819	.735	.281	.164	.068	.029	.086	.01	.003	.082	-.077	-.038
505	222 ARA	64	6	0	3	0	-.001	.604	.017	-.027		.1	0	0	.082	-.001	-.001	1517	1421	.604	.128	.052	.017	.104	-.055	-.027
506	223 ARA	49	5	1	3	.233	.263	.489	.034	-.03		.753	.653	.233	.772	.688	.263	1246	1.15	.489	.181	.105	.034	.097	-.062	-.03
507	224 ARA	10	1	1	3	.9	.84	.217	.012	-.032		2619	2519	.9	2282	2199	.84	.606	.51	.217	.112	.036	.012	.095	-.064	-.032
508	225 ARA	26	3	0	3	.081	.078	.121	.044	-.034		.326	.226	.081	.288	.205	.078	.38	.284	.121	.213	.137	.044	.091	-.068	-.034
509	226 ARA	16	2	0	3	.009	.001	.08	.035	-.032		.124	.024	.009	.086	.003	.001	.283	.187	.08	.185	.109	.035	.094	-.065	-.032
510	227 ARA	28	3	0	3	.19	.232	.651	.023	-.01		.633	.533	.19	.691	.607	.232	1627	1531	.651	.146	.07	.023	.14	-.019	-.01
511	228 ARA	56	6	1	3	.06	.041	.331	.052	-.029		.268	.168	.06	.19	.107	.041	.876	.78	.331	.237	.161	.052	.1	-.059	-.029
512	229 ARA	54	6	0	3	.001	-.004	.214	.114	-.034		.102	.002	.001	.073	-.011	-.004	.6	.504	.214	.429	.353	.114	.09	-.069	-.034
513	230 ARA	66	6	1	3	-.001	-.003	.459	.223	.003		.098	-.002	-.001	.077	-.007	-.003	1176	1.08	.459	.767	.691	.223	.165	.006	.003
514	231 ARA	41	5	1	3	.005	.005	.341	.093	-.024		.114	.014	.005	.097	.013	.005	.899	.803	.341	.364	.288	.093	.11	-.049	-.024
515	232 ARA	49	5	1	3	1078	.903	.54	.006	-.04		3118	3018	1078	2446	2362	.903	1367	1271	.54	.093	.017	.006	.077	-.082	-.04
516	233 ARA	9	1	0	3	.473	.146	.129	.019	-.032		1423	1323	.473	.466	.382	.146	.4	.304	.129	.135	.059	.019	.094	-.065	-.032
517	234 ARA	50	5	1	3	.319	.285	1019	.036	-.03		.992	.892	.319	.828	.745	.285	2493	2397	1019	.186	.11	.036	.098	-.061	-.03
518	235 ARA	23	3	1	3	.089	.015	.275	.434	-.007		.35	.25	.089	.123	.04	.015	.744	.648	.275	1.42	1344	.434	.144	-.015	-.007
519	236 ARA	23	3	1	3	.014	-.001	.256	.07	-.029		.14	.04	.014	.082	-.001	-.001	.698	.602	.256	.293	.217	.07	.101	-.058	-.029
520	237 ARA	32	4	1	3	.012	.005	.242	.021	-.032		.133	.033	.012	.096	.013	.005	.665	.569	.242	.14	.064	.021	.094	-.065	-.032
521	238 ARA	59	6	0	3	.115	.269	.442	.077	-.021		.423	.323	.115	.787	.704	.269	1136	1.04	.442	.314	.238	.077	.116	-.043	-.021
522	239 ARA	44	5	0	3	.021	.02	.118	.069	-.036		.16	.06	.021	.135	.051	.02	.374	.278	.118	.289	.213	.069	.085	-.074	-.036
523	240 ARA	31	4	0	3	.017	.005	.379	.128	-.014		.148	.048	.017	.097	.013	.005	.987	.891	.379	.472	.396	.128	.131	-.028	-.014
524	241 ARA	13	2	0	3	.288	.222	.26	.025	-.035		.906	.806	.288	.665	.582	.222	.707	.611	.26	.153	.077	.025	.088	-.071	-.035
525	242 ARA	51	6	1	3	.044	.022	.415	.083	-.04		.223	.123	.044	.141	.057	.022	1073	.977	.415	.332	.256	.083	.077	-.082	-.04
526	243 ARA	9	1	0	3	.794	.628	.247	.074	-.022		2382	2273	.794	1657	1578	.628	.656	.565	.247	.303	.22	.074	.095	-.043	-.022
527	244 ARA	33	4	1	3	.819	.621	.283	.027	.016		2453	2344	.819	1639	1.56	.621	.737	.646	.283	.163	.08	.027	.138	.033	.016
528	245 ARA	12	2	0	3	.018	.019	.264	.185	.015		.16	.051	.018	.128	.049	.019	.693	.602	.264	.635	.552	.185	.136	.031	.015
529	246 ARA	11	2	1	3	.232	.212	.151	.057	.018		.772	.663	.232	.613	.534	.212	.435	.344	.151	.252	.169	.057	.141	.036	.018
530	247 ARA	41	5	1	3	.328	.256	.079	.039	.008		1048	.939	.328	.722	.643	.256	.272	.181	.079	.2	.117	.039	.121	.015	.008
531	248 ARA	34	4	1	3	.45	.335	.071	.016	.015		1398	1289	.45	.92	.84	.335	.254	.163	.071	.13	.047	.016	.135	.029	.015
532	249 ARA	45	5	1	3	.047	.027	.375	.027	.017		.243	.134	.047	.147	.067	.027	.948	.857	.375	.164	.081	.027	.14	.034	.017
533	250 ARA	56	6	0	3	.05	.073	.258	.028	-.023		.251	.142	.05	.262	.183	.073	.681	.59	.258	.167	.084	.028	.091	-.046	-.023
534	251 ARA	14	2	1	3	.316	.236	.474	.022	.007		1015	.906	.316	.672	.593	.236	1173	1082	.474	.149	.066	.022	.119	.014	.007
535	252 ARA	49	5	0	3	.005	.001	.742	.076	.078		.124	.015	.005	.082	.002	.001	1786	1695	.742	.31	.227	.076	.264	.158	.078
536	253 ARA	42	5	1	3	.008	.003	.369	.066	-.008		.131	.022	.008	.087	.007	.003	.934	.843	.369	.281	.198	.066	.088	-.017	-.008
537	254 ARA	14	2	1	3	.283	.252	.445	.031	-.005		.92	.811	.283	.713	.634	.252	1107	1016	.445	.175	.092	.031	.095	-.01	-.005
538	255 ARA	26	3	0	3	.331	.294	.691	.055	.008		1056	.947	.331	.818	.738	.294	1669	1578	.691	.248	.165	.055	.121	.016	.008
539	256 ARA	15	2	1	3	.116	.107	.038	.032	-.009		.442	.333	.116	.349	.269	.107	.177	.086	.038	.177	.094	.032	.086	-.019	-.009
540	257 ARA	45	5	1	3	.299	.21	.474	.838	.065		.965	.856	.299	.606	.527	.21	1174	1083	.474	2591	2508	.838	.236	.131	.065
541	258 ARA	6	1	1	3	.446	.339	.066	.026	-.001		1385	1276	.446	.932	.852	.339	.242	.151	.066	.161	.078	.026	.104	-.001	-.001
542	259 ARA	9	1	0	3	.03	.033	.288	.005	.003		.194	.085	.03	.163	.083	.033	.749	.658	.288	.097	.014	.005	.111	.006	.003
543	260 ARA	44	5	1	3	.013	.007	.918	.029	-.002		.146	.037	.013	.097	.017	.007	2188	2097	.918	.171	.088	.029	.102	-.004	-.002
544	261 ARA	31	4	1	3	.07	.059	.091	.033	-.012		.309	.2	.07	.227	.148	.059	.299	.208	.091	.18	.097	.033	.081	-.024	-.012
545	262 ARA	9	1	1	3	.944	.859	.449	.022	-.012		2811	2702	.944	2236	2156	.859	1116	1025	.449	.147	.064	.022	.081	-.025	-.012
546	263 ARA	9	1	0	3	-.001	-.004	.066	.004	-.006		.107	-.002	-.001	.069	-.011	-.004	.242	.151	.066	.098	.008	.004	.093	-.013	-.006
547	264 ARA	30	3	1	3	-.006	-.001	.152	.01	-.009		.092	-.017	-.006	.077	-.002	-.001	.438	.347	.152	.112	.029	.01	.086	-.019	-.009
548	01 SLT	59	6	1	4	-.005	-.001	.015	-.002	.002		.059	-.015	-.005	.08	-.001	-.001	.145	.036	.015	.08	-.004	-.002	.1	.003	.002
549	02 SLT	81	6	0	4	.194	.229	.728	.034	.023		.634	.56	.194	.693	.612	.229	1866	1757	.728	.175	.091	.034	.141	.044	.023
550	03 SLT	12	2	1	4	-.001	-.002	.382	.014	-.009		.071	-.003	-.001	.076	-.005	-.002	1.03	.921	.382	.121	.037	.014	.079	-.018	-.009
551	04 SLT	20	2	1	4	.006	.006	.395	-.002	-.003		.092	.018	.006	.098	.017	.006	1063	.954	.395	.077	-.007	-.002	.091	-.006	-.003
552	05 SLT	40	4	0	4	-.005	-.005	.345	-.002	0		.06	-.014	-.005	.069	-.012	-.005	.942	.833	.345	.08	-.004	-.002	.097	0	0
553	06 SLT	5	0	1	4	-.005	-.008	.193	.006	-.015		.058	-.016	-.005	.06	-.021	-.008	.576	.467	.193	.1	.016	.006	.069	-.028	-.015
554	07 SLT	55	6	1	4	.062	.039	.44	.028	-.011		.253	.179	.062	.185	.103	.039	1.17	1061	.44	.157	.073	.028	.075	-.022	-.011
555	08 SLT	31	4	0	4	-.001	-.002	.163	-.007	-.007		.072	-.002	-.001	.077	-.005	-.002	.502	.393	.163	.066	-.018	-.007	.083	-.014	-.007
556	09 SLT	9	1	1	4	.062	.054	.402	.058	.008		.254	.18	.062	.227	.145	.054	1079	.97	.402	.237	.153	.058	.113	.016	.008
557	10 SLT	47	5	0	4	0	.001	.26	.008	.003		.074	0	0	.085	.003	.001	.736	.627	.26	.106	.022	.008	.103	.006	.003
558	11 SLT	43	5	1	4	-.001	-.003	.216	.011	-.001		.071	-.003	-.001	.073	-.009	-.003	.631	.522	.216	.114	.03	.011	.095	-.002	-.001
559	12 SLT	63	6	0	4	.524	.553	.868	.051	.021		1588	1514	.524	1556	1474	.553	2205	2096	.868	.219	.135	.051	.138	.041	.021
560	13 SLT	9	1	0	4	-.002	-.005	.433	.01	.005		.068	-.006	-.002	.068	-.013	-.005	1154	1045	.433	.109	.025	.01	.107	.01	.005
561	14 SLT	4	0	0	4	-.002	-.005	.129	.003	-.003		.067	-.007	-.002	.069	-.013	-.005	.421	.312	.129	.093	.009	.003	.092	-.005	-.003
562	15 SLT	44	5	1	4	-.002	-.004	.167	.005	-.009		.067	-.007	-.002	.071	-.011	-.004	.511	.402	.167	.098	.014	.005	.079	-.018	-.009
563	16 SLT	3	0	1	4	0	-.002	.499	0	-.002		.075	.001	0	.075	-.006	-.002	1314	1205	.499	.084	0	0	.093	-.004	-.002
564	17 SLT	51	6	0	4	.003	.001	.13	.016	-.013		.083	.009	.003	.083	.002	.001	.422	.313	.13	.127	.043	.016	.073	-.024	-.013
565	18 SLT	11	2	0	4	.009	.02	.187	.002	-.002		.097	.027	.009	.13	.059	.02	.483	.386	.187	.095	.005	.002	.083	-.003	-.002
566	19 SLT	54	6	1	4	.002	.007	.525	.022	.007		.076	.006	.002	.09	.02	.007	1.18	1083	.525	.149	.06	.022	.099	.012	.007
567	20 SLT	71	6	1	4	.001	.003	.239	.014	-.003		.074	.004	.001	.079	.008	.003	.589	.493	.239	.127	.037	.014	.081	-.006	-.003
568	21 SLT	5	0	0	4	.007	.008	.219	-.001	.002		.09	.02	.007	.095	.024	.008	.549	.452	.219	.086	-.004	-.001	.089	.003	.002
569	22 SLT	8	1	1	4	.002	.002	.092	.004	-.001		.076	.007	.002	.077	.007	.002	.286	.19	.092	.101	.011	.004	.085	-.002	-.001
570	23 SLT	6	1	1	4	.007	.007	.11	.002	.003		.089	.02	.007	.092	.021	.007	.323	.226	.11	.094	.004	.002	.092	.005	.003
571	24 SLT	4	0	0	4	.003	.002	.067	.003	-.004		.078	.008	.003	.076	.006	.002	.235	.139	.067	.098	.009	.003	.079	-.007	-.004
572	25 SLT	31	4	1	4	.002	.011	.171	.004	-.004		.076	.007	.002	.104	.033	.011	.449	.353	.171	.099	.01	.004	.079	-.008	-.004
573	26 SLT	77	6	1	4	.181	.184	1007	.013	.015		.604	.535	.181	.625	.555	.184	2172	2076	1007	.126	.037	.013	.114	.027	.015
574	27 SLT	1	0	1	4	-.001	.001	.257	-.005	-.003		.067	-.002	-.001	.074	.003	.001	.627	.531	.257	.077	-.013	-.005	.081	-.005	-.003
575	28 SLT	34	4	1	4	.091	.1	.895	.008	.003		.337	.267	.091	.37	.3	.1	1942	1846	.895	.112	.022	.008	.093	.006	.003
576	29 SLT	47	5	1	4	.001	.005	.475	.005	.007		.071	.002	.001	.084	.014	.005	1076	.979	.475	.103	.013	.005	.099	.012	.007
577	30 SLT	10	1	0	4	-.001	-.002	.331	-.004	.01		.067	-.002	-.001	.065	-.005	-.002	.779	.683	.331	.078	-.012	-.004	.105	.019	.01
578	31 SLT	64	6	1	4	.127	.144	.828	.172	.03		.444	.374	.127	.504	.433	.144	1804	1708	.828	.561	.472	.172	.141	.055	.03
579	32 SLT	27	3	0	4	.08	.077	.336	.002	.007		.305	.235	.08	.301	.231	.077	.79	.694	.336	.095	.005	.002	.1	.013	.007
580	33 SLT	6	1	0	4	.01	-.001	.016	-.006	-.009		.099	.03	.01	.067	-.004	-.001	.129	.032	.016	.073	-.016	-.006	.07	-.016	-.009
581	34 SLT	5	0	1	4	-.002	.001	.169	.002	-.001		.064	-.005	-.002	.074	.003	.001	.445	.349	.169	.096	.006	.002	.085	-.001	-.001
582	35 SLT	33	4	1	4	.013	.018	.459	-.002	-.006		.108	.039	.013	.123	.053	.018	1043	.947	.459	.084	-.006	-.002	.076	-.01	-.006
583	36 SLT	7	1	0	4	-.001	-.001	.088	-.007	-.004		.067	-.003	-.001	.068	-.003	-.001	.278	.181	.088	.071	-.019	-.007	.078	-.008	-.004
584	37 SLT	30	3	1	4	-.002	-.002	.249	-.003	-.002		.063	-.006	-.002	.064	-.007	-.002	.611	.514	.249	.082	-.007	-.003	.083	-.003	-.002
585	38 SLT	7	1	0	4	-.002	.002	.115	.01	0		.064	-.005	-.002	.077	.006	.002	.333	.236	.115	.118	.028	.01	.086	-.001	0
586	39 SLT	48	5	1	4	.003	.002	.241	.033	-.007		.077	.008	.003	.077	.006	.002	.593	.497	.241	.179	.089	.033	.074	-.013	-.007
587	40 SLT	20	2	1	4	.012	.011	.372	.007	.001		.106	.037	.012	.104	.033	.011	.863	.767	.372	.107	.018	.007	.088	.001	.001
588	41 SLT	46	5	1	4	.004	.01	.432	.031	.01		.081	.011	.004	.1	.029	.01	.987	.891	.432	.173	.084	.031	.105	.019	.01
589	42 SLT	4	0	1	4	-.002	.002	.303	-.001	-.006		.064	-.006	-.002	.078	.007	.002	.722	.625	.303	.087	-.002	-.001	.075	-.012	-.006
590	43 SLT	28	3	1	4	.002	0	.099	-.006	-.01		.076	.007	.002	.072	.001	0	.301	.204	.099	.074	-.016	-.006	.069	-.018	-.01
591	44 SLT	79	6	0	4	.014	.026	.317	.025	.015		.112	.043	.014	.148	.077	.026	.749	.653	.317	.159	.069	.025	.113	.027	.015
592	45 SLT	30	3	1	4	.006	.019	.454	.024	.013		.087	.017	.006	.128	.057	.019	1033	.936	.454	.156	.066	.024	.11	.024	.013
593	46 SLT	67	6	0	4	.2	.221	.097	.076	.003		.66	.591	.2	.735	.665	.221	.297	.201	.097	.297	.207	.076	.091	.005	.003
594	47 SLT	54	6	0	4	-.002	.004	.275	.003	.059		.062	-.007	-.002	.084	.013	.004	.664	.568	.275	.098	.008	.003	.194	.108	.059
595	48 SLT	7	1	1	4	-.008	-.002	.013	-.008	-.012		.046	-.024	-.008	.063	-.007	-.002	.123	.027	.013	.068	-.022	-.008	.065	-.022	-.012
596	49 SLT	1.75	0	1	4	-.003	-.002	.022	-.01	-.013		.06	-.01	-.003	.065	-.006	-.002	.141	.045	.022	.063	-.027	-.01	.063	-.023	-.013
597	50 SLT	33	4	0	4	.007	.01	.298	.003	.003		.091	.022	.007	.099	.029	.01	.711	.614	.298	.099	.009	.003	.092	.005	.003
598	51 SLT	12	2	1	4	.04	.036	.122	.009	-.006		.188	.118	.04	.178	.107	.036	.348	.252	.122	.113	.023	.009	.076	-.01	-.006
599	52 SLT	12	2	0	4	-.003	.002	.239	-.002	.01		.061	-.008	-.003	.076	.006	.002	.589	.492	.239	.083	-.006	-.002	.105	.019	.01
600	53 SLT	26	3	1	4	.019	.025	.487	.007	.007		.124	.055	.019	.147	.076	.025	1.1	1004	.487	.11	.02	.007	.099	.013	.007
601	54 SLT	4	0	0	4	-.002	.003	.337	-.002	-.003		.064	-.005	-.002	.078	.008	.003	.791	.695	.337	.083	-.007	-.002	.08	-.006	-.003
602	55 SLT	16	2	1	4	.001	.002	.345	0	-.004		.073	.003	.001	.078	.007	.002	.807	.711	.345	.09	0	0	.079	-.008	-.004
603	56 SLT	12	2	1	4	-.004	.006	.26	.006	-.006		.059	-.011	-.004	.088	.017	.006	.633	.536	.26	.105	.016	.006	.075	-.012	-.006
604	57 SLT	12	2	1	4	.004	.006	.093	.001	.003		.082	.013	.004	.089	.018	.006	.288	.192	.093	.091	.002	.001	.092	.006	.003
605	58 SLT	12	2	0	4	.003	.011	.063	.009	.026		.102	.007	.003	.108	.034	.011	.262	.148	.063	.117	.024	.009	.137	.046	.026
606	59 SLT	9	1	0	4	-.002	.005	.055	.018	.01		.088	-.007	-.002	.089	.015	.005	.243	.129	.055	.141	.049	.018	.109	.017	.01
607	60 SLT	9	1	1	4	-.001	.003	.094	-.003	0		.092	-.003	-.001	.083	.009	.003	.333	.219	.094	.084	-.009	-.003	.091	-.001	0
608	61 SLT	6	1	0	4	-.002	.002	.122	-.003	.006		.089	-.006	-.002	.079	.005	.002	.398	.284	.122	.084	-.009	-.003	.101	.01	.006
609	62 SLT	26	3	1	4	.001	.002	.29	.018	-.003		.097	.002	.001	.081	.007	.002	.793	.679	.29	.14	.048	.018	.087	-.005	-.003
610	63 SLT	10	1	0	4	.001	.004	.046	.021	-.002		.097	.002	.001	.085	.011	.004	.221	.107	.046	.149	.057	.021	.089	-.003	-.002
611	64 SLT	8	1	0	4	.001	.004	.174	.004	.013		.098	.003	.001	.086	.012	.004	.52	.406	.174	.104	.011	.004	.113	.022	.013
612	65 SLT	21	3	1	4	.051	.055	.221	.005	.003		.241	.146	.051	.239	.165	.055	.631	.517	.221	.105	.013	.005	.097	.005	.003
613	66 SLT	13	2	1	4	-.004	.001	.085	0	-.003		.084	-.011	-.004	.076	.002	.001	.314	.2	.085	.093	.001	0	.086	-.006	-.003
614	67 SLT	48	5	1	4	-.004	-.002	.496	-.003	-.004		.082	-.013	-.004	.067	-.007	-.002	1274	1.16	.496	.083	-.009	-.003	.084	-.008	-.004
615	68 SLT	.58	0	0	4	-.006	-.001	-.006	-.006	-.015		.078	-.017	-.006	.07	-.004	-.001	.1	-.014	-.006	.075	-.017	-.006	.065	-.026	-.015
616	69 SLT	11	2	0	4	.006	.012	.11	.001	-.002		.113	.018	.006	.109	.035	.012	.37	.256	.11	.094	.002	.001	.089	-.003	-.002
617	70 SLT	5	0	0	4	.06	.053	.221	-.008	-.012		.266	.171	.06	.235	.161	.053	.631	.517	.221	.07	-.022	-.008	.071	-.02	-.012
618	71 SLT	8	1	0	4	.011	.014	.281	-.006	-.006		.127	.032	.011	.116	.042	.014	.77	.656	.281	.075	-.017	-.006	.081	-.01	-.006
619	72 SLT	45	5	1	4	-.002	.006	.493	.026	-.004		.09	-.005	-.002	.093	.019	.006	1268	1154	.493	.161	.069	.026	.085	-.006	-.004
620	73 SLT	60	6	1	4	-.003	.003	.553	.019	.001		.087	-.008	-.003	.082	.008	.003	1408	1294	.553	.142	.049	.019	.093	.001	.001
621	74 SLT	6	1	0	4	-.006	-.003	.039	-.009	.005		.078	-.017	-.006	.064	-.01	-.003	.206	.092	.039	.07	-.023	-.009	.099	.008	.005
622	75 SLT	5	0	1	4	-.007	-.004	.052	-.006	0		.075	-.02	-.007	.062	-.012	-.004	.236	.122	.052	.075	-.017	-.006	.091	0	0
623	76 SLT	33	4	1	4	-.008	0	.193	.018	-.006		.073	-.022	-.008	.074	0	0	.564	.45	.193	.139	.046	.018	.082	-.01	-.006
624	77 SLT	9	1	1	4	-.003	.001	.208	.004	-.003		.087	-.008	-.003	.076	.002	.001	.6	.486	.208	.102	.009	.004	.086	-.006	-.003
625	78 SLT	26	3	1	4	-.008	-.004	.332	-.002	-.007		.073	-.022	-.008	.062	-.012	-.004	.89	.776	.332	.086	-.007	-.002	.08	-.012	-.007
626	79 SLT	58	6	0	4	-.006	-.002	.072	.023	-.002		.078	-.017	-.006	.069	-.005	-.002	.282	.168	.072	.153	.061	.023	.089	-.003	-.002
627	80 SLT	53	6	1	4	-.002	0	.326	.029	.007		.09	-.005	-.002	.073	-.001	0	.876	.762	.326	.169	.076	.029	.103	.011	.007
628	83 SLT	39	4	0	4	0	.001	.682	.018	-.004		.094	-.001	0	.077	.003	.001	1.71	1596	.682	.139	.046	.018	.084	-.007	-.004
629	84 SLT	71	6	1	4	.001	0	.183	.224	.002		.097	.002	.001	.074	0	0	.542	.428	.183	.686	.594	.224	.095	.003	.002
630	85 SLT	13	2	1	4	.01	.016	.03	-.009	-.005		.123	.028	.01	.121	.047	.016	.184	.07	.03	.067	-.025	-.009	.083	-.009	-.005
631	86 SLT	11	2	0	4	-.007	-.002	.105	.015	-.001		.074	-.021	-.007	.067	-.007	-.002	.36	.246	.105	.132	.039	.015	.089	-.002	-.001
632	87 SLT	10	1	1	4	-.003	-.004	.042	.003	-.012		.086	-.009	-.003	.062	-.012	-.004	.213	.099	.042	.1	.007	.003	.071	-.021	-.012
633	88 SLT	8	1	1	4	-.008	-.003	.148	-.001	-.01		.071	-.024	-.008	.066	-.008	-.003	.46	.346	.148	.09	-.002	-.001	.073	-.018	-.01
634	89 SLT	41	5	1	4	.076	.093	.182	.431	.066		.314	.219	.076	.355	.281	.093	.539	.425	.182	1235	1143	.431	.206	.115	.066
635	92 SLT	56	6	0	4	.009	.013	.138	.028	-.008		.121	.026	.009	.114	.04	.013	.437	.323	.138	.167	.074	.028	.078	-.014	-.008
636	93 SLT	73	6	0	4	-.002	-.002	.354	.066	.002		.089	-.006	-.002	.068	-.006	-.002	.943	.829	.354	.267	.174	.066	.095	.003	.002
637	81 SLT	33	4	1	4	.049	.033	.353	.003	.007		.237	.142	.049	.173	.099	.033	.941	.827	.353	.1	.008	.003	.104	.013	.007
638	82 SLT	27	3	1	4	-.001	.002	.033	.029	.011		.091	-.004	-.001	.081	.007	.002	.19	.076	.033	.169	.077	.029	.111	.019	.011
639	95 SLT	25	3	0	4	-.006	-.002	.09	.013	.012		.077	-.018	-.006	.069	-.005	-.002	.325	.211	.09	.126	.033	.013	.112	.021	.012
640	96 SLT	68	6	1	4	-.005	-.001	.311	.108	.029		.079	-.016	-.005	.072	-.002	-.001	.841	.727	.311	.377	.285	.108	.142	.05	.029
641	97 SLT	66	6	1	4	-.006	-.001	.457	.032	-.007		.079	-.016	-.006	.072	-.002	-.001	1184	1.07	.457	.176	.084	.032	.079	-.013	-.007
642	98 SLT	45	5	0	4	-.005	.002	.123	.014	-.002		.08	-.015	-.005	.079	.005	.002	.402	.288	.123	.13	.037	.014	.087	-.004	-.002
643	100 SLT	28	3	1	4	0	.003	.43	.044	.007		.094	-.001	0	.083	.009	.003	1119	1005	.43	.21	.117	.044	.104	.012	.007
644	101 SLT	13	2	1	4	0	-.003	.28	.016	.008		.095	0	0	.066	-.008	-.003	.77	.656	.28	.135	.043	.016	.105	.014	.008
645	102 SLT	20	2	1	4	.017	.013	.154	.071	.005		.14	.053	.017	.116	.039	.013	.441	.343	.154	.269	.19	.071	.111	.008	.005
646	104 SLT	36	4	1	4	-.005	0	.265	.001	-.005		.071	-.016	-.005	.076	-.001	0	.688	.59	.265	.082	.003	.001	.094	-.008	-.005
647	105 SLT	50	5	1	4	.008	.014	.272	.52	.034		.114	.027	.008	.118	.041	.014	.706	.608	.272	1467	1388	.52	.157	.054	.034
648	107 SLT	4	0	1	4	.005	.01	.051	0	-.001		.102	.015	.005	.108	.031	.01	.211	.113	.051	.08	.001	0	.1	-.002	-.001
649	108 SLT	6	1	0	4	-.005	-.001	.084	-.001	-.011		.071	-.016	-.005	.075	-.002	-.001	.286	.188	.084	.077	-.002	-.001	.085	-.017	-.011
650	109 SLT	4	0	1	4	.007	.001	.397	.006	-.007		.11	.023	.007	.08	.003	.001	.984	.886	.397	.094	.015	.006	.09	-.012	-.007
651	111 SLT	6	1	1	4	.002	.001	.056	.013	-.008		.094	.007	.002	.081	.004	.001	.222	.124	.056	.114	.035	.013	.09	-.013	-.008
652	112 SLT	9	1	1	4	0	.002	.079	.009	-.011		.087	0	0	.082	.005	.002	.275	.177	.079	.102	.023	.009	.085	-.018	-.011
653	113 SLT	79	6	1	4	.001	.002	.417	.039	.008		.09	.003	.001	.084	.007	.002	1028	.93	.417	.183	.104	.039	.115	.012	.008
654	114 SLT	12	2	1	4	-.008	-.004	.037	.001	-.005		.062	-.025	-.008	.067	-.01	-.004	.18	.082	.037	.082	.003	.001	.094	-.008	-.005
655	115 SLT	48	5	1	4	-.001	.004	.658	.003	0		.085	-.002	-.001	.088	.011	.004	1567	1469	.658	.086	.007	.003	.102	0	0
656	116 SLT	8	1	1	4	.036	.027	.083	-.003	-.003		.2	.113	.036	.157	.08	.027	.284	.186	.083	.07	-.009	-.003	.097	-.005	-.003
657	117 SLT	5	0	1	4	.002	.006	.052	0	-.007		.092	.005	.002	.095	.018	.006	.214	.116	.052	.08	.001	0	.091	-.011	-.007
658	118 SLT	36	4	1	4	-.008	-.003	.214	.002	-.022		.061	-.026	-.008	.067	-.01	-.003	.576	.478	.214	.085	.006	.002	.066	-.036	-.022
659	119 SLT	25	3	1	4	-.003	0	.136	.011	-.004		.078	-.009	-.003	.077	0	0	.401	.303	.136	.107	.028	.011	.096	-.007	-.004
660	120 SLT	7	1	0	4	-.002	-.002	.024	.003	-.007		.08	-.007	-.002	.072	-.005	-.002	.151	.053	.024	.087	.008	.003	.09	-.012	-.007
661	121 SLT	10	1	1	4	-.008	-.005	.058	0	.004		.062	-.025	-.008	.064	-.013	-.005	.227	.129	.058	.08	.001	0	.108	.006	.004
662	122 SLT	8	1	1	4	-.009	-.004	.032	.012	-.008		.058	-.029	-.009	.066	-.011	-.004	.17	.072	.032	.111	.032	.012	.089	-.014	-.008
663	123 SLT	27	3	1	4	.001	.003	.18	-.002	-.002		.091	.004	.001	.085	.008	.003	.499	.401	.18	.074	-.005	-.002	.099	-.004	-.002
664	124 SLT	25	3	1	4	-.005	.001	.146	.002	-.005		.07	-.017	-.005	.081	.004	.001	.425	.327	.146	.083	.004	.002	.094	-.008	-.005
665	125 SLT	13	2	0	4	-.009	-.004	.078	.001	-.012		.06	-.027	-.009	.066	-.011	-.004	.272	.174	.078	.082	.003	.001	.082	-.02	-.012
666	126 SLT	38	4	0	4	-.008	-.003	.159	.006	.006		.063	-.024	-.008	.067	-.01	-.003	.454	.356	.159	.095	.016	.006	.112	.01	.006
667	128 SLT	55	6	1	4	-.008	-.004	.178	.007	.007		.061	-.026	-.008	.067	-.01	-.004	.494	.396	.178	.098	.019	.007	.113	.011	.007
668	129 SLT	9	1	0	4	-.004	-.005	.111	.003	-.002		.075	-.012	-.004	.064	-.013	-.005	.345	.247	.111	.087	.008	.003	.099	-.003	-.002
669	130 SLT	24	3	0	4	-.008	0	.197	.005	0		.063	-.024	-.008	.076	-.001	0	.538	.44	.197	.092	.013	.005	.103	0	0
670	131 SLT	39	4	0	4	-.005	-.004	.101	.089	.006		.072	-.015	-.005	.067	-.01	-.004	.324	.226	.101	.318	.239	.089	.112	.01	.006
671	132 SLT	7	1	0	4	.007	.012	.184	.016	-.008		.108	.021	.007	.114	.037	.012	.508	.41	.184	.123	.044	.016	.089	-.014	-.008
672	133 SLT	13	2	0	4	-.009	-.004	.186	.005	-.005		.058	-.029	-.009	.065	-.012	-.004	.514	.416	.186	.092	.013	.005	.094	-.008	-.005
673	134 SLT	48	5	0	4	.02	.041	.123	.02	.017		.15	.063	.02	.199	.122	.041	.373	.275	.123	.132	.053	.02	.13	.028	.017
674	135 SLT	28	3	1	4	-.008	-.003	.59	.015	.002		.061	-.026	-.008	.068	-.009	-.003	1415	1317	.59	.118	.039	.015	.105	.003	.002
675	136 SLT	8	1	0	4	-.008	-.003	.805	.005	-.003		.063	-.024	-.008	.067	-.01	-.003	1894	1796	.805	.092	.013	.005	.097	-.005	-.003
676	137 SLT	5	0	0	4	-.005	-.004	.143	-.003	.003		.07	-.017	-.005	.065	-.012	-.004	.418	.32	.143	.07	-.009	-.003	.107	.004	.003
677	138 SLT	40	4	0	4	-.005	-.002	.243	.106	.143		.072	-.015	-.005	.071	-.006	-.002	.64	.542	.243	.363	.284	.106	.335	.232	.143
678	139 SLT	49	5	0	4	-.005	.004	.325	.035	.015		.07	-.017	-.005	.088	.011	.004	.824	.726	.325	.173	.094	.035	.127	.024	.015
679	140 SLT	33	4	1	4	-.005	-.001	1014	.015	-.004		.071	-.016	-.005	.075	-.002	-.001	2361	2263	1014	.118	.039	.015	.095	-.007	-.004
680	141 SLT	41	5	0	4	.582	.676	.697	.216	.084		1932	1845	.582	2084	2007	.676	1653	1555	.697	.655	.576	.216	.238	.135	.084
681	143 SLT	54	6	1	4	-.007	-.003	.563	.015	.001		.066	-.021	-.007	.068	-.009	-.003	1355	1257	.563	.119	.04	.015	.103	.001	.001
682	144 SLT	11	2	1	4	-.008	-.002	.638	.01	.002		.063	-.024	-.008	.071	-.006	-.002	1522	1424	.638	.106	.027	.01	.106	.004	.002
683	145 SLT	8	1	1	4	-.005	0	.743	.002	.001		.071	-.016	-.005	.078	.001	0	1755	1657	.743	.084	.005	.002	.103	.001	.001
684	146 SLT	7	1	0	4	.003	0	.22	.004	.006		.097	.01	.003	.077	0	0	.588	.49	.22	.089	.01	.004	.111	.009	.006
685	147 SLT	25	3	0	4	.044	.088	.188	.028	.003		.203	.133	.044	.312	.249	.088	.533	.406	.188	.17	.065	.028	.112	.005	.003
686	148 SLT	23	3	1	4	.003	.01	.117	-.01	.004		.079	.009	.003	.092	.029	.01	.379	.252	.117	.082	-.023	-.01	.113	.006	.004
687	149 SLT	45	5	0	4	.062	.076	.274	.019	.013		.26	.19	.062	.279	.216	.076	.718	.591	.274	.149	.044	.019	.129	.022	.013
688	150 SLT	24	3	0	4	.005	.013	.369	.049	.025		.085	.015	.005	.101	.037	.013	.922	.794	.369	.225	.134	.049	.148	.041	.025
689	151 SLT	46	5	1	4	.003	.015	.224	.042	.002		.08	.01	.003	.106	.042	.015	.609	.482	.224	.201	.096	.042	.11	.003	.002
690	152 SLT	17	2	1	4	.007	.015	.132	.019	-.005		.091	.021	.007	.105	.042	.015	.411	.284	.132	.143	.052	.019	.098	-.009	-.005
691	157 SLT	22	3	1	4	.003	.012	.25	.017	-.002		.08	.009	.003	.097	.033	.012	.666	.538	.25	.138	.047	.017	.104	-.003	-.002
692	158 SLT	13	2	1	4	.006	.02	.22	-.008	-.014		.088	.017	.006	.122	.058	.02	.6	.473	.22	.085	-.019	-.008	.084	-.023	-.014
693	160 SLT	35	4	1	4	.028	.036	.508	.043	.005		.155	.085	.028	.166	.102	.036	1.22	1093	.508	.208	.117	.043	.115	.008	.005
694	161 SLT	17	2	1	4	-.001	.001	.449	.008	.003		.066	-.004	-.001	.066	.003	.001	1094	.967	.449	.112	.021	.008	.111	.004	.003
695	162 SLT	54	6	1	4	.002	.006	.57	.143	.029		.077	.006	.002	.08	.016	.006	1354	1227	.57	.479	.388	.143	.153	.046	.029
696	163 SLT	29	3	1	4	.177	.206	.427	-.001	-.016		.609	.539	.177	.65	.586	.206	1047	.92	.427	.088	-.003	-.001	.08	-.027	-.016
697	164 SLT	28	3	1	4	.001	.004	.834	-.003	.016		.074	.003	.001	.076	.013	.004	1924	1796	.834	.084	-.007	-.003	.132	.025	.016
698	165 SLT	34	4	0	4	.026	.035	.209	.118	.017		.15	.079	.026	.164	.1	.035	.578	.45	.209	.411	.32	.118	.135	.028	.017
699	166 SLT	27	3	0	4	.054	.052	.119	-.001	0		.235	.164	.054	.21	.147	.052	.383	.255	.119	.089	-.002	-.001	.107	0	0
700	167 SLT	25	3	0	4	.002	.003	.27	.003	-.005		.076	.005	.002	.072	.009	.003	.708	.581	.27	.1	.009	.003	.099	-.008	-.005
701	168 SLT	20	2	1	4	.01	.013	.455	.025	.013		.101	.03	.01	.101	.038	.013	1107	.979	.455	.16	.069	.025	.127	.02	.013
702	169 SLT	8	1	0	4	-.001	.001	.206	-.003	-.001		.068	-.003	-.001	.066	.003	.001	.57	.443	.206	.083	-.008	-.003	.105	-.002	-.001
703	170 SLT	6	1	1	4	-.001	.003	.242	-.007	-.007		.066	-.004	-.001	.072	.008	.003	.649	.521	.242	.071	-.02	-.007	.095	-.012	-.007
704	171 SLT	5	0	0	4	-.003	.003	.214	-.001	-.004		.062	-.009	-.003	.072	.009	.003	.588	.46	.214	.089	-.002	-.001	.101	-.006	-.004
705	172 SLT	16	2	1	4	-.002	.001	.122	-.007	-.013		.063	-.008	-.002	.065	.002	.001	.39	.262	.122	.073	-.018	-.007	.085	-.022	-.013
706	174 SLT	8	1	1	4	-.003	.001	.155	-.004	-.006		.062	-.009	-.003	.066	.002	.001	.462	.334	.155	.079	-.012	-.004	.098	-.009	-.006
707	175 SLT	12	2	1	4	-.001	0	.271	-.003	-.014		.067	-.003	-.001	.064	.001	0	.71	.583	.271	.083	-.008	-.003	.084	-.023	-.014
708	176 SLT	6	1	0	4	-.001	-.001	.298	.017	-.014		.068	-.003	-.001	.061	-.002	-.001	.77	.642	.298	.136	.045	.017	.085	-.022	-.014
709	177 SLT	10	1	1	4	-.002	.002	.012	.019	-.012		.064	-.006	-.002	.069	.006	.002	.154	.026	.012	.142	.051	.019	.088	-.019	-.012
710	179 SLT	34	4	1	4	.015	.016	.598	.108	.021		.116	.045	.015	.109	.045	.016	1414	1287	.598	.385	.294	.108	.14	.033	.021
711	180 SLT	40	4	0	4	-.002	.001	.24	-.004	-.007		.064	-.006	-.002	.066	.003	.001	.643	.516	.24	.08	-.011	-.004	.096	-.011	-.007
712	181 SLT	48	5	0	4	0	.004	.322	.05	.007		.07	0	0	.074	.011	.004	.821	.694	.322	.226	.135	.05	.118	.011	.007
713	182 SLT	33	4	1	4	-.003	.001	.065	.03	-.005		.062	-.009	-.003	.068	.004	.001	.268	.14	.065	.172	.081	.03	.099	-.008	-.005
714	185 SLT	32	4	1	4	.001	.007	.726	.108	.09		.074	.003	.001	.085	.021	.007	1691	1563	.726	.384	.293	.108	.254	.147	.09
715	186 SLT	18	2	1	4	.034	.044	.465	-.001	.057		.175	.104	.034	.188	.125	.044	1128	1	.465	.089	-.002	-.001	.2	.093	.057
716	187 SLT	10	1	1	4	.013	.016	.151	-.002	-.012		.11	.039	.013	.109	.045	.016	.453	.326	.151	.084	-.007	-.002	.087	-.02	-.012
717	188 SLT	57	6	1	4	.042	.045	.517	.31	.139		.2	.129	.042	.191	.128	.045	1241	1114	.517	.933	.842	.31	.333	.226	.139
718	189 SLT	8	1	0	4	.03	.087	.179	.065	.003		.161	.09	.03	.31	.246	.087	.514	.386	.179	.267	.176	.065	.112	.005	.003
719	190 SLT	64	6	0	4	-.001	.007	.435	.158	.056		.068	-.002	-.001	.083	.019	.007	1065	.937	.435	.521	.43	.158	.198	.091	.056
720	191 SLT	26	3	1	4	.051	.068	.776	.028	.011		.226	.155	.051	.256	.193	.068	1799	1671	.776	.168	.077	.028	.125	.018	.011
721	192 SLT	70	6	1	4	-.001	.004	.318	.015	-.002		.068	-.003	-.001	.076	.012	.004	.813	.685	.318	.131	.04	.015	.103	-.004	-.002
722	194 SLT	5	0	1	4	.009	.007	.16	.014	.004		.098	.028	.009	.085	.021	.007	.472	.345	.16	.13	.039	.014	.113	.006	.004
723	195 SLT	9	1	1	4	-.001	.001	.215	-.002	-.01		.069	-.002	-.001	.068	.004	.001	.589	.462	.215	.086	-.005	-.002	.091	-.016	-.01
724	196 SLT	11	2	0	4	0	.001	.193	-.002	-.015		.069	-.001	0	.066	.003	.001	.543	.415	.193	.086	-.005	-.002	.082	-.025	-.015
725	199 SLT	43	5	0	4	.001	.025	.154	.035	.004		.076	.002	.001	.142	.07	.025	.449	.336	.154	.216	.107	.035	.111	.008	.004
726	200 SLT	5	0	0	4	0	.007	.038	0	-.002		.073	-.001	0	.091	.019	.007	.197	.084	.038	.11	.001	0	.099	-.004	-.002
727	202 SLT	49	5	1	4	.011	.013	.447	.071	.042		.107	.033	.011	.109	.037	.013	1093	.98	.447	.326	.217	.071	.181	.078	.042
728	203 SLT	15	2	1	4	0	.007	.414	0	.017		.074	.001	0	.09	.018	.007	1021	.908	.414	.108	-.001	0	.135	.032	.017
729	204 SLT	52	6	1	4	.002	.007	.718	.024	.004		.079	.006	.002	.091	.019	.007	1685	1572	.718	.182	.073	.024	.11	.007	.004
730	205 SLT	22	3	1	4	.155	.145	.754	.001	-.001		.533	.46	.155	.475	.403	.145	1766	1653	.754	.111	.002	.001	.101	-.002	-.001
731	01 TB	64	6	0	5	.025	.027	.357	.11	.03		.147	.074	.025	.148	.076	.027	.895	.782	.357	.445	.336	.11	.158	.055	.03
732	02 TB	58	6	0	5	.004	.013	.01	.04	-.009		.086	.012	.004	.107	.035	.013	.135	.022	.01	.23	.121	.04	.087	-.016	-.009
733	03 TB	35	4	0	5	.53	.472	.71	.308	.048		1643	1569	.53	1387	1315	.472	1669	1556	.71	1.05	.941	.308	.192	.089	.048
734	04 TB	56	6	1	5	-.001	.002	.201	.029	0		.069	-.004	-.001	.077	.005	.002	.552	.439	.201	.198	.089	.029	.103	0	0
735	05 TB	51	6	0	5	.035	.038	.425	.099	.02		.177	.103	.035	.179	.107	.038	1044	.931	.425	.413	.304	.099	.14	.037	.02
736	06 TB	16	2	1	5	.113	.123	.501	.004	.057		.407	.333	.113	.416	.344	.123	1211	1098	.501	.12	.011	.004	.208	.105	.057
737	07 TB	56	6	1	5	.728	.699	.836	.002	.01		2228	2154	.728	2021	1949	.699	1944	1831	.836	.114	.005	.002	.122	.019	.01
738	08 TB	55	6	1	5	.006	.072	.507	.134	.054		.09	.017	.006	.273	.201	.072	1223	1.11	.507	.519	.41	.134	.203	.1	.054
739	09 TB	78	6	1	5	.008	.012	.67	.054	.015		.096	.023	.008	.106	.034	.012	1581	1468	.67	.275	.166	.054	.131	.028	.015
740	10 TB	65	6	1	5	.05	.044	.399	.141	-.002		.222	.148	.05	.195	.123	.044	.987	.874	.399	.538	.429	.141	.099	-.004	-.002
741	11 TB	14	2	1	5	.273	.248	.622	.004	-.003		.88	.807	.273	.763	.691	.248	1476	1363	.622	.122	.013	.004	.097	-.006	-.003
742	12 TB	20	2	1	5	.321	.295	.376	.002	.003		1025	.952	.321	.894	.822	.295	.937	.824	.376	.114	.005	.002	.108	.005	.003
743	13 TB	19	2	0	5	.644	.659	.609	.128	.035		1981	1907	.644	1908	1836	.659	1448	1335	.609	.5	.391	.128	.168	.065	.035
744	14 TB	82	6	0	5	.018	.025	.331	.026	.003		.126	.052	.018	.141	.069	.025	.838	.725	.331	.188	.079	.026	.108	.005	.003
745	15 TB	39	4	0	5	0	.015	.377	.369	.068		.075	.001	0	.114	.042	.015	.938	.825	.377	1237	1128	.369	.228	.125	.068
746	16 TB	52	6	1	5	-.003	-.002	.765	.002	-.008		.065	-.009	-.003	.065	-.007	-.002	1789	1676	.765	.114	.005	.002	.089	-.014	-.008
747	17 TB	58	6	0	5	0	.002	.261	.006	.001		.075	.001	0	.078	.006	.002	.685	.572	.261	.128	.019	.006	.106	.003	.001
748	18 TB	32	4	0	5	.061	.057	.883	.107	.014		.254	.18	.061	.23	.158	.057	2047	1934	.883	.436	.327	.107	.129	.026	.014
749	19 TB	52	6	0	5	.082	.079	.51	.027	.048		.318	.244	.082	.292	.22	.079	1.23	1117	.51	.192	.083	.027	.192	.089	.048
750	20 TB	50	5	1	5	.089	.086	.325	.001	-.009		.336	.263	.089	.311	.239	.086	.825	.712	.325	.113	.004	.001	.086	-.017	-.009
751	21 TB	11	2	1	5	.173	.201	.11	-.009	-.003		.585	.511	.173	.631	.559	.201	.354	.241	.11	.083	-.026	-.009	.098	-.005	-.003
752	22 TB	33	4	1	5	.02	.021	.131	.014	-.001		.133	.06	.02	.129	.057	.021	.4	.287	.131	.153	.044	.014	.102	-.001	-.001
753	23 TB	14	2	0	5	.103	.108	.047	-.013	-.015		.379	.305	.103	.372	.3	.108	.216	.103	.047	.069	-.04	-.013	.076	-.027	-.015
754	24 TB	29	3	0	5	.11	.116	.243	0	-.009		.399	.325	.11	.395	.323	.116	.645	.532	.243	.108	-.001	0	.086	-.017	-.009
755	27 TB	13	2	1	5	-.001	.002	.129	.01	.007		.071	-.003	-.001	.078	.006	.002	.396	.283	.129	.138	.029	.01	.115	.012	.007
756	28 TB	44	5	0	5	.027	.024	.312	.018	.011		.153	.08	.027	.14	.068	.024	.796	.683	.312	.164	.055	.018	.124	.021	.011
757	29 TB	70	6	1	5	.465	.414	.548	.077	.015		1.45	1377	.465	1226	1154	.414	1313	1.2	.548	.344	.235	.077	.131	.028	.015
758	30 TB	1	0	1	5	-.003	-.002	.057	-.007	-.01		.065	-.009	-.003	.067	-.005	-.002	.237	.124	.057	.086	-.023	-.007	.084	-.019	-.01
759	31 TB	24	3	1	5	.14	.086	.156	.17	.006		.488	.415	.14	.312	.24	.086	.456	.343	.156	.629	.52	.17	.115	.012	.006
760	32 TB	29	3	0	5	.524	.473	.162	.007	-.001		1624	1.55	.524	1389	1317	.473	.469	.356	.162	.13	.021	.007	.102	-.001	-.001
761	33 TB	5	0	0	5	.088	.099	.272	.023	.004		.334	.26	.088	.348	.276	.099	.71	.597	.272	.179	.07	.023	.11	.007	.004
762	34 TB	4	0	1	5	.005	.006	.337	-.01	.003		.089	.015	.005	.088	.016	.006	.851	.738	.337	.077	-.032	-.01	.109	.006	.003
763	35 TB	49	5	1	5	.023	.031	.273	.001	.005		.143	.069	.023	.157	.085	.031	.711	.598	.273	.112	.003	.001	.112	.009	.005
764	37 TB	43	5	0	5	.02	.022	.09	.047	.072		.133	.06	.02	.133	.061	.022	.309	.196	.09	.253	.144	.047	.236	.133	.072
765	39 TB	4	0	0	5	.17	.132	.452	.01	.006		.57	.503	.17	.446	.37	.132	1.12	.945	.452	.099	.03	.01	.103	.01	.006
766	41 TB	10	1	1	5	.207	.193	.487	.011	.003		.679	.612	.207	.617	.541	.193	1195	1019	.487	.104	.035	.011	.097	.004	.003
767	42 TB	9	1	0	5	.037	.033	.196	.004	.002		.177	.11	.037	.168	.092	.033	.585	.409	.196	.082	.014	.004	.096	.003	.002
768	43 TB	5	0	1	5	.012	.008	.273	.003	.008		.102	.035	.012	.098	.022	.008	.747	.571	.273	.078	.009	.003	.106	.013	.008
769	44 TB	31	4	1	5	.036	.038	.136	.02	.009		.172	.105	.036	.183	.107	.038	.46	.285	.136	.131	.062	.02	.108	.014	.009
770	45 TB	1.25	0	0	5	.004	.001	.03	.006	.007		.078	.011	.004	.079	.003	.001	.238	.063	.03	.087	.018	.006	.104	.01	.007
771	46 TB	13	2	1	5	.005	.001	.042	.005	.003		.083	.016	.005	.078	.002	.001	.264	.088	.042	.084	.015	.005	.097	.004	.003
772	47 TB	4	0	1	5	.738	.597	.797	.018	.009		2.25	2183	.738	1749	1673	.597	1843	1667	.797	.123	.055	.018	.107	.014	.009
773	48 TB	55	6	1	5	.128	.114	.417	.002	-.009		.445	.378	.128	.396	.32	.114	1047	.871	.417	.075	.006	.002	.079	-.014	-.009
774	49 TB	12	2	1	5	0	-.002	.113	.028	.006		.067	0	0	.071	-.005	-.002	.411	.236	.113	.154	.085	.028	.103	.009	.006
775	52 TB	17	2	0	5	.626	.569	.469	.001	.002		1917	1.85	.626	1668	1592	.569	1157	.981	.469	.071	.003	.001	.096	.002	.002
776	53 TB	49	5	1	5	.075	.074	.248	.326	.042		.29	.223	.075	.283	.207	.074	.695	.519	.248	1079	1011	.326	.159	.065	.042
777	54 TB	65	6	1	5	.017	.015	.094	.061	.028		.118	.051	.017	.119	.043	.015	.372	.196	.094	.257	.189	.061	.137	.043	.028
778	55 TB	29	3	1	5	.116	.097	.225	.099	.003		.41	.343	.116	.348	.272	.097	.647	.471	.225	.376	.308	.099	.097	.004	.003
779	56 TB	6	1	1	5	.078	.075	.349	.007	-.003		.297	.23	.078	.286	.21	.075	.905	.73	.349	.09	.022	.007	.089	-.004	-.003
780	57 TB	9	1	1	5	.036	.025	.308	.003	.003		.173	.106	.036	.147	.071	.025	.819	.643	.308	.078	.009	.003	.098	.005	.003
781	58 TB	8	1	0	5	.116	.106	.041	.006	.007		.41	.343	.116	.374	.298	.106	.26	.085	.041	.088	.02	.006	.104	.01	.007
782	59 TB	31	4	1	5	.032	.028	.152	.003	-.006		.162	.095	.032	.155	.079	.028	.494	.318	.152	.076	.008	.003	.084	-.01	-.006
783	60 TB	9	1	1	5	.022	.019	.459	.008	.012		.131	.064	.022	.129	.053	.019	1135	.959	.459	.093	.025	.008	.112	.019	.012
784	61 TB	25	3	1	5	.134	.128	.214	.012	.004		.465	.398	.134	.434	.358	.128	.624	.448	.214	.105	.036	.012	.1	.006	.004
785	62 TB	34	4	0	5	.009	.004	.37	.168	.074		.094	.027	.009	.088	.012	.004	.949	.773	.37	.589	.521	.168	.21	.116	.074
786	63 TB	6	1	1	5	.063	.056	.277	.002	-.009		.253	.186	.063	.232	.156	.056	.754	.578	.277	.073	.005	.002	.079	-.015	-.009
787	65 TB	39	4	0	5	.536	.422	.692	.088	.118		1653	1586	.536	1256	1.18	.422	1623	1447	.692	.341	.273	.088	.278	.184	.118
788	66 TB	39	4	0	5	.584	.503	.349	.072	.015		1795	1728	.584	1485	1409	.503	.905	.729	.349	.292	.223	.072	.116	.023	.015
789	67 TB	48	5	0	5	.003	.007	.4	.032	.023		.075	.008	.003	.095	.019	.007	1013	.837	.4	.166	.098	.032	.129	.036	.023
790	68 TB	65	6	0	5	.116	.099	.168	.05	.024		.41	.343	.116	.352	.276	.099	.526	.351	.168	.224	.155	.05	.131	.037	.024
791	69 TB	20	2	0	5	.023	.016	.353	.916	.343		.135	.068	.023	.122	.046	.016	.914	.739	.353	2908	2839	.916	.631	.537	.343
792	70 TB	15	2	1	5	.007	.003	.145	.002	-.006		.087	.02	.007	.084	.008	.003	.479	.303	.145	.073	.005	.002	.084	-.01	-.006
793	71 TB	12	2	1	5	0	-.001	.216	.013	.017		.067	0	0	.074	-.002	-.001	.627	.452	.216	.11	.042	.013	.12	.027	.017
794	72 TB	57	6	1	5	.016	.013	.252	.012	-.001		.115	.048	.016	.113	.037	.013	.702	.526	.252	.107	.038	.012	.091	-.002	-.001
795	73 TB	20	2	1	5	.038	.033	.607	.009	-.004		.18	.113	.038	.169	.093	.033	1445	1.27	.607	.097	.029	.009	.087	-.007	-.004
796	77 TB	11	2	0	5	.188	.153	.202	.011	-.001		.624	.557	.188	.504	.428	.153	.597	.422	.202	.103	.035	.011	.092	-.001	-.001
797	79 TB	11	2	1	5	.077	.064	.184	.011	.002		.294	.227	.077	.255	.179	.064	.559	.384	.184	.102	.034	.011	.096	.003	.002
798	80 TB	49	5	0	5	.035	.023	.387	.305	.114		.17	.103	.035	.14	.064	.023	.985	.81	.387	1013	.944	.305	.272	.178	.114
799	83 TB	9	1	1	5	.098	.084	.193	.022	-.004		.356	.289	.098	.31	.234	.084	.578	.403	.193	.138	.069	.022	.088	-.006	-.004
800	87 TB	38	4	0	5	.007	.003	.091	.049	.006		.089	.022	.007	.085	.009	.003	.365	.189	.091	.222	.153	.049	.103	.009	.006
801	88 TB	13	2	0	5	0	-.004	.082	.006	-.009		.066	-.001	0	.065	-.011	-.004	.348	.172	.082	.088	.02	.006	.08	-.014	-.009
802	89 TB	52	6	0	5	.006	.012	.312	.067	.018		.084	.017	.006	.11	.034	.012	.828	.652	.312	.277	.208	.067	.121	.027	.018
803	90 TB	51	6	1	5	.159	.129	.277	.001	-.008		.538	.471	.159	.436	.36	.129	.755	.579	.277	.072	.004	.001	.081	-.012	-.008
804	91 TB	57	6	0	5	.019	.009	.229	.043	.001		.123	.056	.019	.101	.025	.009	.653	.478	.229	.2	.132	.043	.095	.002	.001
805	92 TB	49	5	1	5	0	.011	.738	.013	-.005		.083	0	0	.111	.033	.011	1365	1271	.738	.12	.041	.013	.09	-.008	-.005
806	93 TB	64	6	0	5	.117	.104	.035	0	-.01		.427	.344	.117	.378	.3	.104	.155	.061	.035	.079	0	0	.083	-.015	-.01
807	96 TB	25	3	1	5	.207	.171	.344	.104	.017		.691	.608	.207	.571	.494	.171	.686	.592	.344	.407	.328	.104	.123	.025	.017
808	99 TB	50	5	0	5	.058	.044	.118	.141	.015		.252	.169	.058	.206	.128	.044	.296	.203	.118	.522	.443	.141	.121	.023	.015
809	101 TB	52	6	1	5	.174	.137	.476	.374	.033		.592	.509	.174	.473	.395	.137	.914	.82	.476	1257	1178	.374	.148	.05	.033
810	102 TB	26	3	0	5	.011	.01	.135	.031	.022		.116	.033	.011	.108	.03	.01	.326	.233	.135	.177	.098	.031	.131	.033	.022
811	103 TB	13	2	0	5	.03	.021	.457	.038	.004		.171	.088	.03	.137	.06	.021	.88	.787	.457	.198	.119	.038	.104	.006	.004
812	104 TB	26	3	0	5	.423	.291	.268	.093	.036		1324	1241	.423	.916	.839	.291	.555	.462	.268	.372	.293	.093	.153	.055	.036
813	105 TB	21	3	1	5	.863	.769	.542	.019	-.008		2612	2529	.863	2294	2216	.769	1028	.934	.542	.138	.059	.019	.085	-.013	-.008
814	106 TB	49	5	1	5	.001	.002	.415	.061	.078		.086	.003	.001	.084	.006	.002	.808	.715	.415	.27	.191	.061	.217	.119	.078
815	107 TB	17	2	1	5	-.002	-.001	.063	.001	.013		.077	-.006	-.002	.074	-.003	-.001	.202	.109	.063	.081	.002	.001	.118	.02	.013
816	108 TB	67	6	0	5	0	-.001	.037	.03	.001		.083	0	0	.074	-.003	-.001	.157	.063	.037	.173	.094	.03	.099	.001	.001
817	109 TB	29	3	1	5	.149	.126	.643	.008	-.018		.519	.436	.149	.441	.363	.126	1202	1108	.643	.105	.026	.008	.101	-.039	-.018
818	110 TB	29	3	1	5	.066	.065	.307	.007	0		.277	.194	.066	.265	.188	.065	.623	.529	.307	.101	.022	.007	.098	0	0
819	111 TB	63	6	0	5	.01	.008	.315	.399	.271		.111	.028	.01	.101	.024	.008	.636	.543	.315	1335	1256	.399	.513	.415	.271
820	112 TB	12	2	0	5	.054	.04	.104	.003	.01		.241	.158	.054	.192	.114	.04	.273	.179	.104	.087	.008	.003	.113	.015	.01
821	113 TB	9	1	1	5	.274	.206	.108	.002	-.011		.885	.802	.274	.672	.595	.206	.28	.187	.108	.086	.007	.002	.081	-.017	-.011
822	114 TB	7	1	0	5	-.004	-.003	.044	.021	-.018		.072	-.011	-.004	.07	-.008	-.003	.169	.076	.044	.145	.066	.021	.07	-.028	-.018
823	115 TB	4	0	0	5	-.004	.001	.08	-.001	.001		.073	-.01	-.004	.079	.002	.001	.232	.138	.08	.077	-.002	-.001	.099	.001	.001
824	116 TB	2	0	0	5	-.001	-.002	.121	0	-.002		.081	-.002	-.001	.073	-.004	-.002	.301	.208	.121	.08	.001	0	.095	-.003	-.002
825	117 TB	1	0	1	5	-.001	-.002	-.002	-.003	.009		.079	-.004	-.001	.072	-.005	-.002	.091	-.003	-.002	.069	-.01	-.003	.112	.014	.009
826	118 TB	54	6	1	5	.292	.298	.946	.038	.022		.94	.857	.292	.936	.858	.298	1724	1.63	.946	.2	.121	.038	.132	.034	.022
827	121 TB	4	0	1	5	.071	.065	.331	.061	-.001		.291	.208	.071	.264	.187	.065	.664	.57	.331	.271	.192	.061	.096	-.002	-.001
828	122 TB	8	1	0	5	.044	.034	.107	.087	.005		.212	.129	.044	.176	.098	.034	.278	.185	.107	.353	.274	.087	.106	.008	.005
829	123 TB	72	6	1	5	.009	.006	.264	.06	.004		.108	.025	.009	.096	.018	.006	.549	.455	.264	.268	.189	.06	.104	.006	.004
830	124 TB	4	0	0	5	.035	.039	.029	.003	-.014		.185	.102	.035	.19	.112	.039	.143	.049	.029	.089	.01	.003	.076	-.022	-.014
831	125 TB	2	0	1	5	.347	.298	.006	.006	-.004		1101	1018	.347	.937	.86	.298	.104	.011	.006	.097	.018	.006	.092	-.006	-.004
832	128 TB	23	3	1	5	.142	.139	.266	.076	.021		.499	.416	.142	.479	.402	.139	.551	.458	.266	.317	.238	.076	.13	.032	.021
833	129 TB	21	3	1	5	-.002	-.001	.227	.008	-.002		.077	-.006	-.002	.075	-.003	-.001	.485	.391	.227	.104	.025	.008	.095	-.003	-.002
834	130 TB	23	3	0	5	.011	.013	.352	.028	.024		.117	.034	.011	.115	.037	.013	.701	.607	.352	.167	.088	.028	.135	.037	.024
835	132 TB	22	3	1	5	.012	.008	.418	.014	0		.117	.034	.012	.101	.024	.008	.813	.72	.418	.124	.045	.014	.098	0	0
836	133 TB	18	2	0	5	.263	.199	.128	.003	-.002		.855	.772	.263	.652	.575	.199	.314	.22	.128	.088	.009	.003	.095	-.003	-.002
837	135 TB	14	2	0	5	.054	.051	.039	.006	-.016		.243	.16	.054	.224	.146	.051	.16	.067	.039	.099	.02	.006	.073	-.025	-.016
838	136 TB	2.83	0	0	5	.086	.084	.327	0	.002		.336	.253	.086	.32	.243	.084	.657	.564	.327	.079	0	0	.101	.003	.002
839	137 TB	51	6	1	5	.031	.033	.245	.208	.033		.173	.09	.031	.173	.095	.033	.516	.422	.245	.734	.655	.208	.149	.051	.033
840	138 TB	12	2	1	5	.103	.11	.051	.002	.002		.384	.301	.103	.393	.316	.11	.181	.088	.051	.085	.006	.002	.101	.003	.002
841	148 TB	62	6	0	5	.13	.15	.229	.526	.079		.464	.381	.13	.511	.433	.15	.489	.395	.229	1735	1656	.526	.308	.167	.079
842	149 TB	44	5	0	5	.006	.005	.386	.023	.01		.1	.017	.006	.093	.015	.005	.758	.664	.386	.152	.073	.023	.114	.016	.01
843	150 TB	6	1	0	5	.003	-.001	.019	.002	.002		.091	.008	.003	.076	-.002	-.001	.127	.033	.019	.085	.006	.002	.101	.003	.002
844	151 TB	4	0	0	5	.001	-.001	.074	-.001	-.004		.087	.004	.001	.074	-.003	-.001	.221	.128	.074	.077	-.002	-.001	.092	-.006	-.004
845	152 TB	24	3	1	5	.014	.012	.182	-.002	-.012		.118	.041	.014	.108	.032	.012	.412	.315	.182	.075	-.005	-.002	.088	-.02	-.012
846	153 TB	46	5	1	5	.648	.608	.368	.024	-.001		2015	1938	.648	1735	1659	.608	.734	.637	.368	.152	.072	.024	.106	-.002	-.001
847	154 TB	18	2	1	5	0	0	.483	.007	-.006		.077	0	0	.076	0	0	.934	.837	.483	.102	.022	.007	.098	-.01	-.006
848	155 TB	30	3	0	5	.014	.021	.135	.044	.016		.119	.042	.014	.134	.058	.021	.331	.234	.135	.212	.132	.044	.134	.026	.016
849	156 TB	13	2	0	5	.09	.115	.277	0	.003		.347	.27	.09	.391	.315	.115	.578	.481	.277	.081	.001	0	.112	.005	.003
850	157 TB	28	3	1	5	.001	.006	.24	.014	.004		.08	.003	.001	.092	.016	.006	.512	.415	.24	.124	.044	.014	.115	.007	.004
851	159 TB	52	6	0	5	.083	.072	.254	.13	.007		.325	.248	.083	.271	.195	.072	.538	.441	.254	.472	.392	.13	.119	.011	.007
852	160 TB	55	6	0	5	.014	.018	.106	.023	.012		.119	.042	.014	.126	.05	.018	.281	.184	.106	.149	.069	.023	.126	.019	.012
853	162 TB	32	4	1	5	0	0	.202	.024	.021		.077	0	0	.076	0	0	.446	.349	.202	.153	.073	.024	.142	.035	.021
854	163 TB	13	2	1	5	.014	.002	.815	-.001	-.006		.118	.041	.014	.081	.005	.002	1509	1412	.815	.076	-.004	-.001	.098	-.009	-.006
855	164 TB	15	2	0	5	-.002	-.001	.068	.02	-.005		.07	-.007	-.002	.073	-.003	-.001	.214	.117	.068	.139	.059	.02	.099	-.008	-.005
856	165 TB	25	3	1	5	-.001	.002	.084	.03	.012		.073	-.004	-.001	.082	.006	.002	.242	.145	.084	.17	.09	.03	.126	.019	.012
857	166 TB	28	3	1	5	-.003	0	.313	.007	.002		.068	-.009	-.003	.077	.001	0	.639	.542	.313	.101	.021	.007	.111	.004	.002
858	167 TB	11	2	1	5	.024	.029	.072	.003	-.007		.148	.071	.024	.155	.079	.029	.221	.124	.072	.088	.008	.003	.096	-.011	-.007
859	168 TB	29	3	1	5	.006	.009	.505	.016	-.012		.096	.019	.006	.099	.023	.009	.971	.874	.505	.128	.048	.016	.088	-.02	-.012
860	169 TB	36	4	1	5	-.005	.001	.392	.015	.004		.063	-.014	-.005	.079	.003	.001	.776	.679	.392	.126	.046	.015	.115	.007	.004
861	170 TB	40	4	1	5	.043	.054	.383	.023	.016		.206	.129	.043	.223	.147	.054	.761	.664	.383	.15	.07	.023	.134	.026	.016
862	171 TB	13	2	1	5	-.005	-.003	.018	-.004	-.007		.061	-.016	-.005	.069	-.007	-.003	.129	.032	.018	.069	-.011	-.004	.096	-.012	-.007
863	172 TB	6	1	0	5	-.004	-.003	.057	0	-.03		.065	-.012	-.004	.069	-.007	-.003	.196	.099	.057	.081	.001	0	.11	-.059	-.03
864	173 TB	63	6	0	5	.368	.401	.242	.068	.067		1179	1102	.368	1171	1095	.401	.516	.419	.242	.284	.204	.068	.216	.109	.067
865	174 TB	17	2	0	5	-.002	-.003	.076	-.002	-.008		.071	-.006	-.002	.067	-.009	-.003	.228	.131	.076	.075	-.005	-.002	.094	-.014	-.008
866	175 TB	12	2	0	5	-.002	-.003	.361	.003	.004		.07	-.007	-.002	.069	-.007	-.003	.722	.625	.361	.088	.008	.003	.114	.007	.004
867	176 TB	58	6	0	5	-.003	.001	.401	.075	.009		.068	-.009	-.003	.078	.002	.001	.792	.695	.401	.307	.227	.075	.122	.014	.009
868	177 TB	57	6	0	5	.004	.114	.776	.008	.01		.088	.011	.004	.388	.312	.114	1442	1345	.776	.105	.025	.008	.124	.016	.01
869	179 TB	59	6	0	5	.174	.153	.095	.691	.376		.598	.521	.174	.493	.417	.153	.262	.165	.095	2168	2088	.691	.717	.61	.376
870	180 TB	48	5	1	5	.051	.059	.262	.008	-.004		.231	.154	.051	.238	.162	.059	.55	.453	.262	.106	.026	.008	.101	-.006	-.004
871	181 TB	53	6	1	5	.052	.063	.18	-.002	-.008		.233	.156	.052	.247	.171	.063	.409	.312	.18	.074	-.006	-.002	.094	-.014	-.008
872	182 TB	26	3	1	5	.014	.013	.11	.003	-.011		.118	.041	.014	.111	.035	.013	.288	.191	.11	.089	.009	.003	.09	-.017	-.011
873	183 TB	66	6	1	5	.091	.114	.449	.651	.182		.351	.274	.091	.388	.312	.114	.875	.778	.449	2049	1969	.651	.403	.296	.182
874	185 TB	7	1	1	5	.073	.075	.559	.004	.003		.294	.217	.073	.282	.206	.075	1065	.968	.559	.092	.012	.004	.112	.004	.003
875	186 TB	5	0	1	5	.031	.033	.012	0	-.006		.17	.093	.031	.165	.089	.033	.117	.02	.012	.08	0	0	.098	-.009	-.006
876	187 TB	26	3	1	5	.001	.001	.166	-.002	.014		.079	.002	.001	.079	.003	.001	.384	.287	.166	.073	-.007	-.002	.13	.023	.014
877	188 TB	2	0	1	5	-.001	0	.133	.226	.007		.073	-.004	-.001	.076	0	0	.327	.23	.133	.765	.685	.226	.119	.012	.007
878	190 TB	12	2	0	5	-.002	.001	.17	.009	.012		.072	-.005	-.002	.079	.003	.001	.391	.294	.17	.109	.029	.009	.127	.02	.012
879	191 TB	42	5	1	5	.12	.119	.382	.026	.003		.438	.361	.12	.402	.326	.119	.759	.662	.382	.158	.078	.026	.112	.005	.003
880	195 TB	47	5	1	5	-.001	.002	.309	.069	.077		.074	-.003	-.001	.08	.004	.002	.633	.536	.309	.287	.207	.069	.232	.124	.077
881	196 TB	45	5	0	5	.117	.116	.049	.114	.028		.428	.351	.117	.393	.317	.116	.182	.085	.049	.426	.346	.114	.153	.046	.028
882	199 TB	4	0	0	5	.01	.002	.004	-.004	-.008		.107	.03	.01	.081	.005	.002	.104	.007	.004	.068	-.012	-.004	.094	-.013	-.008
883	200 TB	6	1	0	5	.001	.002	.131	.001	.001		.079	.002	.001	.081	.005	.002	.323	.226	.131	.084	.004	.001	.109	.002	.001
884	201 TB	12	2	0	5	.129	.126	.174	-.001	.026		.465	.388	.129	.42	.344	.126	.398	.301	.174	.077	-.003	-.001	.149	.042	.026
885	204 TB	14	2	0	5	.466	.429	.335	.036	-.024		1631	1527	.466	1201	1128	.429	.712	.608	.335	.193	.107	.036	.109	-.045	-.024
886	207 TB	32	4	1	5	.005	.014	.145	.009	.025		.12	.016	.005	.109	.036	.014	.368	.263	.145	.113	.026	.009	.202	.048	.025
887	209 TB	18	2	0	5	.024	.048	.595	.01	-.023		.182	.078	.024	.2	.127	.048	1183	1078	.595	.116	.029	.01	.111	-.043	-.023
888	213 TB	32	4	1	5	-.007	.004	.512	.057	.002		.079	-.025	-.007	.082	.01	.004	1033	.929	.512	.256	.17	.057	.157	.003	.002
889	215 TB	38	4	0	5	-.009	.001	.102	.022	-.03		.074	-.029	-.009	.076	.003	.001	.289	.185	.102	.153	.066	.022	.097	-.057	-.03
890	216 TB	4	0	1	5	-.007	.003	.185	.001	-.001		.082	-.022	-.007	.081	.008	.003	.439	.335	.185	.09	.003	.001	.152	-.002	-.001
891	217 TB	52	6	0	5	.001	.011	.193	0	-.029		.107	.004	.001	.102	.03	.011	.454	.349	.193	.087	.001	0	.1	-.054	-.029
892	218 TB	24	3	0	5	-.005	.006	.144	.004	-.023		.087	-.017	-.005	.089	.016	.006	.365	.26	.144	.098	.011	.004	.11	-.044	-.023
893	219 TB	27	3	0	5	.702	.673	.196	.041	-.022		2406	2302	.702	1843	1.77	.673	.459	.355	.196	.209	.122	.041	.112	-.042	-.022
894	220 TB	24	3	1	5	-.011	-.003	.046	-.005	-.024		.066	-.038	-.011	.064	-.008	-.003	.189	.084	.046	.071	-.015	-.005	.108	-.046	-.024
895	221 TB	22	3	1	5	-.006	0	.308	-.002	-.029		.082	-.021	-.006	.071	-.001	0	.663	.558	.308	.081	-.005	-.002	.1	-.054	-.029
896	222 TB	31	4	0	5	-.012	-.003	.16	-.005	-.024		.065	-.038	-.012	.063	-.009	-.003	.394	.289	.16	.072	-.014	-.005	.109	-.045	-.024
897	226 TB	37	4	1	5	-.007	.001	.059	.003	-.029		.079	-.025	-.007	.076	.004	.001	.212	.108	.059	.096	.009	.003	.099	-.055	-.029
898	227 TB	42	5	0	5	-.003	.01	.173	.41	.207		.092	-.011	-.003	.1	.027	.01	.417	.313	.173	1302	1215	.41	.549	.395	.207
899	228 TB	8	1	0	5	.01	.034	.116	.056	-.03		.135	.031	.01	.162	.089	.034	.315	.211	.116	.252	.165	.056	.097	-.057	-.03
900	230 TB	7	1	1	5	0	.001	.048	-.002	-.027		.105	.001	0	.076	.003	.001	.192	.088	.048	.081	-.005	-.002	.103	-.051	-.027
901	232 TB	26	3	1	5	.746	.686	.259	.029	-.027		2548	2445	.746	1879	1807	.686	.573	.469	.259	.172	.085	.029	.102	-.052	-.027
902	233 TB	23	3	1	5	-.006	0	.786	.013	-.023		.083	-.021	-.006	.072	-.001	0	1.53	1425	.786	.126	.039	.013	.11	-.044	-.023
903	234 TB	8	1	1	5	-.013	-.004	.107	-.002	-.025		.06	-.043	-.013	.062	-.01	-.004	.298	.193	.107	.08	-.007	-.002	.106	-.048	-.025
904	235 TB	5	0	0	5	-.013	-.005	.007	-.008	-.037		.06	-.043	-.013	.059	-.013	-.005	.117	.012	.007	.063	-.024	-.008	.083	-.071	-.037
905	236 TB	28	3	1	5	-.013	-.004	.643	.015	-.03		.061	-.043	-.013	.063	-.01	-.004	1.27	1166	.643	.13	.044	.015	.097	-.057	-.03
906	239 TB	31	4	1	5	-.009	.001	.25	.05	-.011		.075	-.028	-.009	.075	.002	.001	.557	.452	.25	.235	.148	.05	.134	-.02	-.011
907	241 TB	32	4	0	5	.772	.742	.233	.107	-.03		2634	2531	.772	2025	1952	.742	.527	.423	.233	.404	.318	.107	.097	-.057	-.03
908	242 TB	49	5	1	5	.202	.167	.55	.394	.032		.764	.661	.202	.513	.441	.167	1101	.997	.55	1252	1166	.394	.215	.061	.032
909	243 TB	4	0	0	5	-.008	-.003	-.005	-.007	-.035		.078	-.026	-.008	.064	-.008	-.003	.095	-.01	-.005	.066	-.02	-.007	.087	-.067	-.035
910	245 TB	1.33	0	0	5	-.011	-.003	.098	.004	-.029		.066	-.037	-.011	.064	-.009	-.003	.282	.177	.098	.099	.012	.004	.099	-.055	-.029
911	246 TB	18	2	1	5	-.012	-.002	.504	.054	-.026		.065	-.038	-.012	.067	-.005	-.002	1018	.914	.504	.245	.159	.054	.105	-.049	-.026
912	247 TB	18	2	1	5	-.012	-.003	.377	.012	-.029		.063	-.041	-.012	.066	-.007	-.003	.788	.684	.377	.121	.035	.012	.098	-.056	-.029
913	248 TB	16	2	1	5	-.012	0	.566	.091	-.027		.064	-.039	-.012	.072	0	0	1131	1026	.566	.357	.27	.091	.103	-.051	-.027
914	249 TB	55	6	1	5	.012	.011	.483	.153	.028		.142	.038	.012	.102	.03	.011	.981	.876	.483	.538	.452	.153	.208	.054	.028
915	251 TB	10	1	1	5	-.012	-.002	.043	.018	-.036		.063	-.041	-.012	.067	-.005	-.002	.183	.079	.043	.139	.053	.018	.086	-.068	-.036
916	252 TB	9	1	0	5	-.006	.013	.948	.083	-.024		.084	-.019	-.006	.106	.033	.013	1822	1718	.948	.333	.247	.083	.109	-.045	-.024
917	253 TB	15	2	1	5	.011	.004	.123	.06	-.031		.139	.035	.011	.082	.01	.004	.328	.223	.123	.265	.178	.06	.094	-.06	-.031
918	254 TB	13	2	0	5	.011	.018	.45	.005	-.016		.139	.036	.011	.119	.046	.018	.92	.816	.45	.102	.016	.005	.124	-.03	-.016
919	255 TB	46	5	1	5	.013	.024	.655	.017	-.003		.145	.042	.013	.135	.062	.024	1291	1186	.655	.138	.051	.017	.149	-.005	-.003
920	257 TB	56	6	0	5	.287	.305	.062	.018	-.032		1043	.94	.287	.875	.803	.305	.218	.113	.062	.139	.052	.018	.094	-.06	-.032
921	259 TB	43	5	1	5	.278	.284	.133	-.003	-.031		1014	.91	.278	.821	.749	.284	.345	.241	.133	.098	-.007	-.003	.096	-.058	-.031
922	262 TB	48	5	1	5	.113	.152	.402	.813	.147		.473	.37	.113	.471	.399	.152	.834	.729	.402	2494	2408	.813	.434	.28	.147
923	263 TB	26	3	0	5	-.012	.001	.279	.007	-.031		.065	-.039	-.012	.076	.003	.001	.61	.505	.279	.107	.021	.007	.094	-.06	-.031
924	266 TB	2	0	0	5	.023	.014	.045	-.002	-.022		.178	.075	.023	.109	.036	.014	.186	.081	.045	.08	-.007	-.002	.112	-.042	-.022
925	267 TB	46	5	1	5	.016	.04	.427	.013	-.022		.119	.047	.016	.195	.104	.04	.876	.775	.427	.12	.038	.013	.1	-.044	-.022
926	268 TB	51	6	0	5	.005	.015	.399	.281	.322		.086	.014	.005	.13	.039	.015	.825	.724	.399	.898	.816	.281	.79	.646	.322
927	269 TB	37	4	1	5	.066	.048	.144	.002	-.021		.268	.196	.066	.217	.126	.048	.363	.262	.144	.088	.006	.002	.102	-.042	-.021
928	270 TB	16	2	1	5	.098	.074	.114	.002	-.02		.363	.291	.098	.285	.194	.074	.307	.206	.114	.089	.007	.002	.105	-.039	-.02
929	271 TB	33	4	1	5	.011	.009	.19	.009	-.019		.104	.032	.011	.116	.025	.009	.445	.344	.19	.109	.027	.009	.107	-.037	-.019
930	272 TB	4	0	1	5	.005	.002	.096	.02	-.019		.087	.015	.005	.095	.004	.002	.276	.175	.096	.14	.058	.02	.107	-.038	-.019
931	276 TB	33	4	1	5	.037	.056	.221	.76	.047		.182	.11	.037	.239	.148	.056	.502	.401	.221	2292	2.21	.76	.238	.093	.047
932	277 TB	13	2	1	5	.04	.049	.049	.006	-.019		.191	.119	.04	.22	.129	.049	.19	.089	.049	.098	.016	.006	.106	-.039	-.019
933	279 TB	36	4	0	5	.135	.115	.188	.214	.032		.472	.4	.135	.395	.304	.115	.443	.342	.188	.706	.624	.214	.209	.064	.032
934	284 TB	28	3	0	5	.102	.085	.305	.005	-.017		.375	.303	.102	.316	.225	.085	.655	.554	.305	.098	.016	.005	.11	-.034	-.017
935	33 COT-R	5	0	0	6	-.001	.009	.103	.009	.018		.074	-.002	-.001	.106	.025	.009	.302	.209	.103	.092	.024	.009	.146	.039	.018
936	34 COT-R	6	1	0	6	-.003	.001	.011	-.001	-.008		.067	-.009	-.003	.083	.002	.001	.116	.023	.011	.066	-.003	-.001	.09	-.018	-.008
937	35 COT-R	4	0	0	6	-.004	0	.028	.002	-.006		.066	-.01	-.004	.082	.001	0	.149	.056	.028	.074	.006	.002	.094	-.014	-.006
938	36 COT-R	7	1	0	6	-.005	0	.025	-.002	-.008		.064	-.012	-.005	.081	0	0	.144	.051	.025	.064	-.004	-.002	.089	-.019	-.008
939	37 COT-R	9	1	1	6	.003	.007	.051	.001	-.007		.085	.009	.003	.101	.02	.007	.196	.103	.051	.071	.002	.001	.091	-.016	-.007
940	39 COT-R	6	1	0	6	.009	.01	.063	.008	-.007		.102	.026	.009	.11	.029	.01	.22	.127	.063	.09	.021	.008	.091	-.016	-.007
941	40 COT-R	6	1	0	6	.003	.033	.078	.052	.001		.084	.007	.003	.173	.095	.033	.236	.153	.078	.208	.14	.052	.101	.002	.001
942	41 COT-R	7	1	1	6	.002	.009	.096	.015	.004		.082	.005	.002	.102	.024	.009	.271	.187	.096	.11	.041	.015	.109	.009	.004
943	42 COT-R	8	1	1	6	0	.004	.071	.008	-.003		.076	-.001	0	.09	.012	.004	.222	.138	.071	.091	.022	.008	.092	-.007	-.003
944	43 COT-R	4	0	1	6	.005	.009	.069	.01	.001		.089	.013	.005	.105	.027	.009	.219	.135	.069	.096	.028	.01	.101	.002	.001
945	44 COT-R	.67	0	1	6	0	.005	-.002	.013	-.005		.076	-.001	0	.091	.013	.005	.08	-.004	-.002	.104	.035	.013	.088	-.011	-.005
946	45 COT-R	8	1	1	6	.004	.005	.072	.007	.003		.088	.011	.004	.093	.015	.005	.224	.141	.072	.086	.018	.007	.107	.007	.003
947	46 COT-R	7	1	0	6	.002	.004	.111	.006	.001		.082	.006	.002	.09	.012	.004	.301	.217	.111	.084	.015	.006	.101	.002	.001
948	47 COT-R	4	0	0	6	.016	.011	.145	.016	.011		.119	.043	.016	.109	.031	.011	.368	.284	.145	.112	.043	.016	.122	.022	.011
949	49 COT-R	3	0	1	6	0	.009	.026	.01	.003		.076	-.001	0	.104	.026	.009	.135	.052	.026	.094	.026	.01	.106	.006	.003
950	50 COT-R	4	0	1	6	-.003	.005	.001	-.002	-.005		.068	-.009	-.003	.092	.014	.005	.085	.002	.001	.063	-.006	-.002	.088	-.012	-.005
951	52 COT-R	11	2	0	6	-.002	.002	.041	0	-.003		.071	-.005	-.002	.085	.007	.002	.163	.079	.041	.068	-.001	0	.093	-.006	-.003
952	53 COT-R	10	1	1	6	.003	.009	.295	.02	.011		.083	.007	.003	.103	.025	.009	.661	.578	.295	.122	.054	.02	.122	.022	.011
953	54 COT-R	7	1	0	6	-.002	.003	.241	.003	-.001		.071	-.005	-.002	.086	.008	.003	.556	.472	.241	.076	.008	.003	.098	-.002	-.001
954	55 COT-R	10	1	0	6	-.003	.005	.137	.005	.001		.068	-.008	-.003	.091	.013	.005	.351	.268	.137	.082	.014	.005	.102	.002	.001
955	56 COT-R	6	1	1	6	0	.004	.036	.008	.006		.077	0	0	.089	.011	.004	.154	.071	.036	.09	.022	.008	.112	.013	.006
956	57 COT-R	10	1	1	6	.012	.012	.169	.004	-.003		.111	.034	.012	.111	.033	.012	.414	.33	.169	.08	.011	.004	.093	-.007	-.003
957	58 COT-R	7	1	1	6	0	.011	.034	.033	-.001		.077	.001	0	.11	.032	.011	.149	.066	.034	.157	.088	.033	.097	-.002	-.001
958	59 COT-R	5	0	0	6	.005	.009	.031	.043	-.007		.09	.013	.005	.103	.025	.009	.144	.06	.031	.184	.115	.043	.085	-.014	-.007
959	60 COT-R	6	1	0	6	.021	.018	.089	.035	-.006		.133	.057	.021	.13	.052	.018	.257	.174	.089	.163	.094	.035	.086	-.013	-.006
960	61 COT-R	5	0	0	6	-.005	.003	.302	.003	-.004		.063	-.013	-.005	.086	.008	.003	.674	.591	.302	.076	.008	.003	.091	-.009	-.004
961	62 COT-R	.67	0	0	6	-.003	0	-.004	0	-.007		.068	-.008	-.003	.079	.001	0	.075	-.008	-.004	.069	0	0	.085	-.014	-.007
962	63 COT-R	5	0	1	6	-.005	-.001	.016	.002	-.006		.062	-.014	-.005	.075	-.003	-.001	.114	.031	.016	.073	.004	.002	.086	-.013	-.006
963	64 COT-R	3	0	1	6	-.003	0	.034	.003	-.003		.069	-.008	-.003	.077	-.001	0	.151	.067	.034	.077	.009	.003	.094	-.006	-.003
964	65 COT-R	9	1	1	6	.021	.015	.037	.015	.009		.135	.059	.021	.122	.044	.015	.156	.072	.037	.108	.04	.015	.119	.02	.009
965	66 COT-R	11	2	0	6	-.005	.002	.111	.007	-.008		.064	-.013	-.005	.083	.005	.002	.3	.216	.111	.088	.02	.007	.081	-.018	-.008
966	67 COT-R	2.42	0	0	6	.002	.003	.014	.005	-.009		.082	.006	.002	.085	.007	.003	.112	.028	.014	.082	.013	.005	.08	-.019	-.009
967	68 COT-R	10	1	1	6	.032	.022	.115	.02	.041		.165	.088	.032	.14	.062	.022	.309	.226	.115	.123	.054	.02	.187	.088	.041
968	69 COT-R	9	1	0	6	0	.003	.059	.006	-.003		.077	0	0	.087	.009	.003	.198	.115	.059	.085	.017	.006	.092	-.007	-.003
969	70 COT-R	7	1	1	6	-.004	.001	.02	-.002	-.005		.064	-.012	-.004	.081	.003	.001	.123	.039	.02	.063	-.005	-.002	.088	-.011	-.005
970	71 COT-R	10	1	1	6	-.005	.003	.044	.005	0		.064	-.013	-.005	.086	.008	.003	.169	.086	.044	.081	.012	.005	.1	0	0
971	72 COT-R	10	1	0	6	-.003	.001	.038	.005	-.004		.069	-.007	-.003	.08	.002	.001	.158	.075	.038	.083	.014	.005	.092	-.008	-.004
972	73 COT-R	4	0	0	6	-.001	.005	.057	.01	-.002		.074	-.003	-.001	.092	.014	.005	.195	.111	.057	.094	.026	.01	.095	-.005	-.002
973	74 COT-R	9	1	1	6	-.004	.006	.021	.012	0		.065	-.012	-.004	.094	.016	.006	.125	.042	.021	.101	.033	.012	.098	-.001	0
974	75 COT-R	8	1	0	6	-.002	.002	.019	.003	-.008		.07	-.006	-.002	.083	.005	.002	.121	.037	.019	.076	.007	.003	.083	-.017	-.008
975	76 COT-R	9	1	0	6	-.003	.001	.013	0	-.008		.067	-.009	-.003	.081	.003	.001	.108	.025	.013	.068	0	0	.083	-.017	-.008
976	77 COT-R	10	1	1	6	-.004	.003	.21	.004	-.005		.065	-.011	-.004	.087	.009	.003	.494	.411	.21	.078	.01	.004	.088	-.011	-.005
977	78 COT-R	3	0	0	6	-.001	.002	.015	.004	-.003		.072	-.004	-.001	.084	.006	.002	.112	.029	.015	.08	.011	.004	.094	-.006	-.003
978	79 COT-R	9	1	1	6	-.001	.001	.045	.003	-.003		.072	-.004	-.001	.081	.003	.001	.171	.088	.045	.077	.009	.003	.093	-.007	-.003
979	81 COT-R	5	0	1	6	-.002	.003	-.001	.004	-.006		.071	-.006	-.002	.087	.009	.003	.081	-.002	-.001	.079	.01	.004	.087	-.013	-.006
980	82 COT-R	3	0	0	6	-.005	.01	.02	.012	-.004		.063	-.013	-.005	.106	.028	.01	.123	.04	.02	.102	.033	.012	.091	-.008	-.004
981	327 COT-P	35	4	1	6	.055	.059	.056	.025	.002		.209	.143	.055	.259	.163	.059	.206	.107	.056	.145	.07	.025	.112	.005	.002
982	328 COT-P	4	0	0	6	.003	-.003	.019	.004	-.002		.075	.009	.003	.088	-.009	-.003	.136	.037	.019	.085	.01	.004	.102	-.005	-.002
983	329 COT-P	6	1	0	6	.003	-.005	.012	0	-.004		.074	.007	.003	.083	-.014	-.005	.122	.024	.012	.074	-.001	0	.099	-.008	-.004
984	331 COT-P	43	5	0	6	.004	-.003	.052	.003	0		.077	.011	.004	.088	-.009	-.003	.198	.1	.052	.084	.009	.003	.106	-.001	0
985	332 COT-P	17	2	1	6	.005	-.003	.014	.001	.005		.079	.013	.005	.088	-.009	-.003	.125	.026	.014	.079	.004	.001	.117	.01	.005
986	334 COT-P	66	6	0	6	.01	.001	.31	.025	.004		.092	.026	.01	.101	.004	.001	.691	.593	.31	.143	.068	.025	.115	.008	.004
987	335 COT-P	11	2	0	6	.008	0	.051	.024	.025		.087	.021	.008	.096	0	0	.197	.098	.051	.142	.067	.024	.161	.054	.025
988	336 COT-P	80	6	0	6	.007	-.003	.347	.018	.016		.085	.019	.007	.088	-.008	-.003	.761	.663	.347	.125	.05	.018	.143	.036	.016
989	337 COT-P	19	2	1	6	0	-.005	.014	0	-.004		.067	0	0	.084	-.013	-.005	.125	.027	.014	.075	0	0	.099	-.008	-.004
990	338 COT-P	4	0	1	6	.012	.009	.092	.012	.035		.098	.032	.012	.123	.026	.009	.275	.176	.092	.107	.032	.012	.183	.076	.035
991	339 COT-P	6	1	0	6	.007	.015	.069	.018	-.005		.084	.018	.007	.138	.041	.015	.23	.131	.069	.124	.049	.018	.096	-.011	-.005
992	340 COT-P	37	4	1	6	.008	-.002	.193	.005	.002		.088	.022	.008	.091	-.005	-.002	.468	.369	.193	.088	.013	.005	.111	.004	.002
993	341 COT-P	11	2	1	6	.015	-.005	.049	.003	-.004		.106	.04	.015	.083	-.014	-.005	.192	.094	.049	.083	.008	.003	.099	-.008	-.004
994	342 COT-P	14	2	1	6	.003	-.005	.114	.002	.005		.073	.007	.003	.083	-.014	-.005	.317	.219	.114	.08	.005	.002	.118	.011	.005
995	343 COT-P	25	3	0	6	.002	-.001	.133	.011	.008		.072	.006	.002	.093	-.004	-.001	.353	.255	.133	.105	.03	.011	.125	.018	.008
996	344 COT-P	9	1	1	6	.002	-.004	.069	.006	.004		.072	.005	.002	.086	-.011	-.004	.23	.131	.069	.091	.016	.006	.116	.009	.004
997	345 COT-P	8	1	1	6	.001	-.005	.069	.004	-.002		.068	.002	.001	.083	-.013	-.005	.23	.131	.069	.085	.01	.004	.103	-.004	-.002
998	346 COT-P	12	2	1	6	-.005	-.011	-.021	-.007	-.011		.055	-.012	-.005	.067	-.029	-.011	.059	-.04	-.021	.055	-.02	-.007	.083	-.024	-.011
999	347 COT-P	10	1	1	6	.006	-.004	.041	-.006	-.008		.081	.015	.006	.084	-.012	-.004	.177	.079	.041	.059	-.016	-.006	.09	-.017	-.008
1000	349 COT-P	42	5	1	6	.036	.035	.196	.017	.003		.161	.094	.036	.195	.098	.035	.473	.374	.196	.121	.046	.017	.113	.006	.003
1001	350 COT-P	65	6	0	6	.314	.358	.688	.008	.015		.879	.812	.314	1093	.996	.358	1414	1316	.688	.096	.021	.008	.14	.033	.015
1002	351 COT-P	19	2	1	6	.025	.006	.104	0	-.005		.13	.064	.025	.112	.016	.006	.298	.2	.104	.076	.001	0	.096	-.011	-.005
1003	352 COT-P	29	3	1	6	.001	-.003	.596	.003	-.003		.069	.002	.001	.088	-.009	-.003	1238	1.14	.596	.083	.008	.003	.1	-.007	-.003
1004	353 COT-P	7	1	1	6	.002	0	.067	.019	.013		.073	.006	.002	.096	-.001	0	.226	.128	.067	.126	.051	.019	.135	.028	.013
1005	354 COT-P	67	6	0	6	.003	-.002	.325	.048	.003		.074	.008	.003	.092	-.004	-.002	.72	.621	.325	.208	.133	.048	.114	.007	.003
1006	355 COT-P	62	6	0	6	.025	.021	.364	.003	.044		.13	.064	.025	.156	.059	.021	.795	.696	.364	.083	.008	.003	.204	.097	.044
1007	356 COT-P	19	2	1	6	.001	-.002	.08	.01	.009		.069	.003	.001	.092	-.005	-.002	.252	.154	.08	.102	.027	.01	.126	.019	.009
1008	357 COT-P	20	2	1	6	.006	-.008	.066	.006	-.004		.083	.017	.006	.076	-.021	-.008	.226	.127	.066	.091	.016	.006	.099	-.008	-.004
1009	358 COT-P	2	0	1	6	0	-.008	-.013	-.004	-.005		.067	0	0	.075	-.021	-.008	.073	-.025	-.013	.065	-.01	-.004	.097	-.01	-.005
1010	359 COT-P	61	6	0	6	.019	.014	.321	.009	.005		.116	.049	.019	.134	.038	.014	.712	.614	.321	.1	.025	.009	.118	.011	.005
1011	360 COT-P	52	6	1	6	-.001	-.006	.173	.019	-.002		.065	-.001	-.001	.081	-.016	-.006	.43	.332	.173	.128	.053	.019	.103	-.004	-.002
1012	361 COT-P	13	2	0	6	-.001	-.006	.078	0	.002		.065	-.002	-.001	.079	-.017	-.006	.247	.149	.078	.075	0	0	.112	.005	.002
1013	362 COT-P	56	6	1	6	.034	.023	.373	.018	.003		.155	.088	.034	.16	.064	.023	.812	.714	.373	.124	.049	.018	.113	.006	.003
1014	363 COT-P	57	6	0	6	.024	.021	.277	.011	.016		.13	.063	.024	.156	.06	.021	.627	.529	.277	.104	.029	.011	.141	.034	.016
1015	364 COT-P	37	4	0	6	.004	.004	.384	.028	.017		.077	.011	.004	.108	.012	.004	.832	.734	.384	.152	.077	.028	.144	.037	.017
1016	365 COT-P	35	4	0	6	.002	-.003	.196	.007	0		.073	.006	.002	.089	-.007	-.003	.473	.375	.196	.095	.02	.007	.108	.001	0
1017	366 COT-P	21	3	0	6	.003	.001	.14	.008	.009		.075	.008	.003	.1	.004	.001	.367	.268	.14	.098	.023	.008	.127	.02	.009
1018	367 COT-P	43	5	0	6	.027	.025	.255	.023	.009		.137	.071	.027	.166	.069	.025	.586	.487	.255	.139	.064	.023	.126	.019	.009
1019	368 COT-P	2	0	1	6	.016	.009	.36	.003	0		.107	.04	.016	.123	.026	.009	.787	.689	.36	.083	.008	.003	.107	0	0
1020	369 COT-P	16	2	1	6	.001	-.005	.27	.004	.014		.07	.003	.001	.083	-.014	-.005	.615	.517	.27	.087	.012	.004	.138	.031	.014
1021	370 COT-P	22	3	1	6	-.003	.005	.342	.001	.001		.068	-.008	-.003	.119	.014	.005	.827	.685	.342	.129	.002	.001	.103	.001	.001
1022	371 COT-P	24	3	0	6	.017	-.004	.242	-.017	-.002		.138	.043	.017	.094	-.011	-.004	.626	.484	.242	.081	-.046	-.017	.098	-.003	-.002
1023	372 COT-P	25	3	0	6	.096	.096	.567	.002	.005		.345	.25	.096	.368	.263	.096	1276	1134	.567	.134	.007	.002	.112	.011	.005
1024	373 COT-P	42	5	1	6	.08	.063	.035	.008	.007		.302	.207	.08	.278	.173	.063	.213	.071	.035	.149	.022	.008	.117	.015	.007
1025	374 COT-P	17	2	0	6	.005	-.008	.06	-.012	-.004		.107	.012	.005	.082	-.023	-.008	.262	.12	.06	.093	-.034	-.012	.094	-.008	-.004
1026	375 COT-P	8	1	1	6	.003	-.002	.176	-.014	-.001		.104	.009	.003	.099	-.006	-.002	.495	.353	.176	.087	-.04	-.014	.1	-.001	-.001
1027	376 COT-P	31	4	1	6	.008	-.003	.399	.002	.008		.115	.02	.008	.096	-.009	-.003	.941	.799	.399	.134	.007	.002	.119	.018	.008
1028	377 COT-P	31	4	1	6	.002	.001	.566	.009	.013		.083	.007	.002	.109	.004	.001	1275	1133	.566	.152	.025	.009	.131	.029	.013
1029	378 COT-P	14	2	1	6	.006	-.004	.03	-.014	-.007		.11	.015	.006	.094	-.011	-.004	.201	.059	.03	.087	-.04	-.014	.086	-.015	-.007
1030	379 COT-P	68	6	0	6	.008	.002	.53	-.01	.011		.117	.022	.008	.111	.006	.002	1203	1061	.53	.098	-.029	-.01	.126	.024	.011
1031	380 COT-P	35	4	0	6	-.004	-.009	.16	-.013	-.005		.084	-.011	-.004	.08	-.025	-.009	.462	.32	.16	.091	-.036	-.013	.092	-.01	-.005
1032	381 COT-P	40	4	1	6	-.003	.006	.355	-.013	.006		.087	-.008	-.003	.121	.016	.006	.853	.711	.355	.091	-.036	-.013	.115	.014	.006
1033	382 COT-P	18	2	1	6	-.005	-.008	.117	-.011	-.002		.083	-.012	-.005	.084	-.021	-.008	.375	.233	.117	.095	-.032	-.011	.097	-.005	-.002
1034	383 COT-P	15	2	1	6	.024	.024	.035	.002	0		.159	.064	.024	.172	.067	.024	.212	.07	.035	.132	.005	.002	.101	-.001	0
1035	384 COT-P	14	2	0	6	-.006	-.002	.17	-.013	-.002		.078	-.017	-.006	.101	-.004	-.002	.483	.341	.17	.091	-.036	-.013	.098	-.003	-.002
1036	385 COT-P	31	4	1	6	.008	-.004	.102	-.007	.001		.116	.021	.008	.094	-.011	-.004	.346	.204	.102	.108	-.019	-.007	.103	.002	.001
1037	386 COT-P	55	6	1	6	.008	.004	.242	.032	.022		.115	.02	.008	.115	.01	.004	.627	.485	.242	.215	.088	.032	.148	.047	.022
1038	387 COT-P	64	6	0	6	-.003	-.002	.038	-.011	.023		.088	-.007	-.003	.1	-.005	-.002	.218	.076	.038	.097	-.03	-.011	.152	.05	.023
1039	388 COT-P	17	2	0	6	.001	-.004	.057	-.015	-.002		.097	.002	.001	.093	-.012	-.004	.256	.114	.057	.086	-.041	-.015	.098	-.004	-.002
1040	389 COT-P	9	1	0	6	-.008	-.01	.231	-.02	-.002		.073	-.022	-.008	.079	-.026	-.01	.603	.461	.231	.07	-.057	-.02	.096	-.005	-.002
1041	390 COT-P	34	4	0	6	-.008	-.007	.108	-.018	.004		.075	-.02	-.008	.086	-.019	-.007	.357	.215	.108	.077	-.05	-.018	.11	.008	.004
1042	391 COT-P	27	3	0	6	.007	.006	.115	-.015	-.001		.112	.017	.007	.122	.017	.006	.371	.229	.115	.086	-.041	-.015	.099	-.003	-.001
1043	392 COT-P	47	5	1	6	-.009	-.007	.491	-.003	0		.072	-.023	-.009	.086	-.019	-.007	1124	.982	.491	.117	-.01	-.003	.102	0	0
1044	393 COT-P	13	2	0	6	-.006	-.008	.026	-.019	-.001		.079	-.016	-.006	.084	-.021	-.008	.194	.052	.026	.073	-.054	-.019	.1	-.001	-.001
1045	394 COT-P	6	1	0	6	.003	-.004	.078	-.007	-.002		.104	.009	.003	.094	-.011	-.004	.298	.156	.078	.109	-.018	-.007	.097	-.004	-.002
1046	395 COT-P	32	4	1	6	-.004	-.007	.267	-.017	.003		.086	-.009	-.004	.086	-.019	-.007	.677	.535	.267	.08	-.047	-.017	.108	.006	.003
1047	396 COT-P	33	4	1	6	-.007	-.01	.096	-.018	-.006		.077	-.018	-.007	.078	-.027	-.01	.334	.192	.096	.078	-.049	-.018	.088	-.014	-.006
1048	397 COT-P	45	5	0	6	-.005	-.004	.089	.002	.007		.081	-.014	-.005	.093	-.012	-.004	.319	.177	.089	.133	.006	.002	.117	.016	.007
1049	398 COT-P	51	6	1	6	-.005	-.007	.092	-.007	-.002		.081	-.014	-.005	.086	-.019	-.007	.327	.185	.092	.108	-.019	-.007	.098	-.004	-.002
1050	399 COT-P	28	3	0	6	-.009	-.008	.282	-.021	.001		.071	-.024	-.009	.084	-.021	-.008	.707	.565	.282	.069	-.058	-.021	.103	.001	.001
1051	400 COT-P	58	6	0	6	-.007	-.008	.223	-.012	-.001		.076	-.019	-.007	.084	-.021	-.008	.587	.445	.223	.093	-.034	-.012	.1	-.001	-.001
1052	401 COT-P	77	6	0	6	.002	-.001	.026	.002	.014		.101	.006	.002	.102	-.003	-.001	.193	.051	.026	.133	.006	.002	.132	.031	.014
1053	402 COT-P	33	4	1	6	.004	-.005	.482	-.001	-.001		.106	.011	.004	.091	-.014	-.005	1106	.964	.482	.125	-.002	-.001	.099	-.002	-.001
1054	403 COT-P	12	2	0	6	-.001	-.003	.018	-.015	.001		.091	-.004	-.001	.096	-.009	-.003	.178	.036	.018	.086	-.041	-.015	.105	.003	.001
1055	404 COT-P	38	4	1	6	-.006	-.009	.139	-.019	-.002		.078	-.017	-.006	.079	-.026	-.009	.42	.278	.139	.075	-.052	-.019	.096	-.005	-.002
1056	405 COT-P	12	2	1	6	.032	.033	.04	-.014	.001		.179	.084	.032	.196	.091	.033	.221	.079	.04	.087	-.04	-.014	.103	.002	.001
1057	406 COT-P	14	2	1	6	.144	.137	.094	-.016	-.004		.471	.376	.144	.482	.377	.137	.33	.188	.094	.084	-.043	-.016	.093	-.008	-.004
1058	407 COT-P	7	1	1	6	.064	.071	.102	.005	.004		.261	.166	.064	.299	.194	.071	.346	.204	.102	.141	.014	.005	.111	.009	.004
1059	408 COT-P	61	6	1	6	-.007	-.003	.118	-.015	.005		.077	-.018	-.007	.097	-.008	-.003	.378	.236	.118	.086	-.041	-.015	.113	.011	.005
1060	409 COT-P	16	2	0	6	-.002	-.008	.136	-.017	-.002		.089	-.006	-.002	.083	-.022	-.008	.415	.273	.136	.079	-.048	-.017	.097	-.005	-.002
1061	410 COT-P	27	3	0	6	.023	.028	.149	.02	-.013		.173	.072	.023	.166	.073	.028	.379	.291	.149	.165	.059	.02	.111	-.026	-.013
1062	411 COT-P	34	4	0	6	-.002	.013	.205	-.002	.042		.094	-.007	-.002	.127	.034	.013	.488	.4	.205	.099	-.007	-.002	.213	.093	.042
1063	412 COT-P	25	3	0	6	-.009	-.001	.223	.003	-.005		.074	-.027	-.009	.09	-.003	-.001	.523	.434	.223	.115	.009	.003	.11	-.01	-.005
1064	413 COT-P	38	4	0	6	.011	.019	.424	.011	.008		.135	.034	.011	.143	.05	.019	.913	.825	.424	.139	.033	.011	.138	.018	.008
1065	414 COT-P	17	2	1	6	-.004	.007	.124	.012	.004		.087	-.013	-.004	.11	.017	.007	.329	.241	.124	.141	.035	.012	.128	.008	.004
1066	415 COT-P	14	2	1	6	-.006	-.001	.151	-.011	-.007		.08	-.02	-.006	.09	-.003	-.001	.382	.294	.151	.074	-.032	-.011	.106	-.014	-.007
1067	416 COT-P	48	5	0	6	-.005	0	.226	.009	0		.086	-.014	-.005	.093	0	0	.529	.44	.226	.133	.027	.009	.12	0	0
1068	417 COT-P	31	4	0	6	.006	.004	.274	-.005	.022		.119	.019	.006	.103	.01	.004	.622	.534	.274	.09	-.016	-.005	.169	.049	.022
1069	418 COT-P	32	4	0	6	.005	.005	.285	.024	.053		.117	.017	.005	.106	.013	.005	.643	.554	.285	.176	.07	.024	.236	.116	.053
1070	419 COT-P	17	2	0	6	-.002	.002	.08	.006	-.015		.093	-.008	-.002	.099	.006	.002	.245	.156	.08	.123	.017	.006	.107	-.03	-.015
1071	420 COT-P	10	1	0	6	-.008	.001	.32	-.01	-.005		.075	-.026	-.008	.095	.002	.001	.712	.624	.32	.078	-.028	-.01	.108	-.012	-.005
1072	421 COT-P	60	6	1	6	-.006	.005	.391	.012	.007		.08	-.02	-.006	.106	.013	.005	.85	.761	.391	.141	.035	.012	.136	.016	.007
1073	422 COT-P	34	4	0	6	-.008	.002	.537	-.001	.021		.075	-.026	-.008	.097	.004	.002	1133	1044	.537	.103	-.003	-.001	.167	.047	.021
1074	423 COT-P	6	1	0	6	-.009	-.002	.08	-.009	-.007		.072	-.028	-.009	.087	-.006	-.002	.245	.156	.08	.079	-.027	-.009	.105	-.015	-.007
1075	424 COT-P	43	5	1	6	-.009	-.004	.216	-.011	-.007		.074	-.027	-.009	.082	-.011	-.004	.508	.42	.216	.074	-.032	-.011	.104	-.016	-.007
1076	425 COT-P	18	2	1	6	.005	.001	.245	-.004	.004		.117	.017	.005	.097	.004	.001	.565	.476	.245	.095	-.011	-.004	.13	.01	.004
1077	426 COT-P	11	2	1	6	-.011	-.008	.177	.013	.02		.067	-.033	-.011	.074	-.019	-.008	.433	.345	.177	.144	.038	.013	.165	.045	.02
1078	04 SUC	64	6	0	7	.009	.004	.045	0	-.015		.12	.028	.009	.113	.011	.004	.179	.087	.045	.079	.001	0	.07	-.03	-.015
1079	05 SUC	17	2	0	7	.01	-.002	.315	-.002	-.003		.123	.031	.01	.098	-.005	-.002	.705	.612	.315	.073	-.005	-.002	.094	-.005	-.003
1080	06SUC	12	2	0	7	-.005	-.01	.334	0	.011		.075	-.017	-.005	.074	-.028	-.01	.741	.649	.334	.077	-.001	0	.122	.022	.011
1081	07 SUC	69	6	0	7	-.004	-.007	.382	.029	.022		.078	-.014	-.004	.083	-.019	-.007	.834	.742	.382	.155	.077	.029	.143	.043	.022
1082	08 SUC	12	2	0	7	-.006	-.008	.179	.002	0		.074	-.018	-.006	.079	-.024	-.008	.44	.348	.179	.084	.005	.002	.1	0	0
1083	09 SUC	72	6	0	7	.001	-.003	.698	.04	-.003		.095	.002	.001	.093	-.009	-.003	1448	1355	.698	.182	.104	.04	.093	-.007	-.003
1084	10 SUC	10	1	1	7	.003	-.009	.334	.026	-.001		.101	.009	.003	.076	-.026	-.009	.741	.648	.334	.146	.067	.026	.098	-.001	-.001
1085	11 SUC	75	6	0	7	-.005	-.006	.343	.01	.01		.077	-.015	-.005	.086	-.016	-.006	.759	.667	.343	.105	.027	.01	.12	.02	.01
1086	12 SUC	45	5	1	7	-.004	-.012	.265	-.002	-.013		.081	-.012	-.004	.066	-.037	-.012	.607	.514	.265	.072	-.006	-.002	.074	-.026	-.013
1087	14 SUC	25	3	0	7	-.006	-.012	.211	-.003	.003		.072	-.021	-.006	.067	-.036	-.012	.502	.41	.211	.07	-.008	-.003	.106	.006	.003
1088	19 SUC	23	3	1	7	-.008	-.012	.37	.009	-.001		.067	-.026	-.008	.068	-.035	-.012	.812	.719	.37	.103	.024	.009	.097	-.003	-.001
1089	20 SUC	27	3	0	7	-.007	-.01	.261	.001	-.009		.07	-.022	-.007	.074	-.028	-.01	.6	.507	.261	.081	.002	.001	.081	-.019	-.009
1090	22 SUC	75	6	1	7	-.005	-.006	.598	.012	.004		.075	-.017	-.005	.085	-.017	-.006	1253	1161	.598	.11	.031	.012	.107	.008	.004
1091	23 SUC	83	6	0	7	-.005	-.01	.244	.023	-.005		.077	-.016	-.005	.074	-.028	-.01	.566	.474	.244	.14	.061	.023	.089	-.01	-.005
1092	25 SUC	57	6	1	7	-.001	-.009	.528	.022	-.008		.09	-.002	-.001	.077	-.025	-.009	1117	1025	.528	.135	.057	.022	.083	-.017	-.008
1093	26 SUC	57	6	0	7	-.006	-.01	.569	.008	-.013		.072	-.021	-.006	.072	-.03	-.01	1198	1106	.569	.1	.021	.008	.075	-.025	-.013
1094	27 SUC	30	3	1	7	-.006	-.007	.436	.013	-.009		.075	-.018	-.006	.083	-.019	-.007	.94	.848	.436	.114	.035	.013	.082	-.017	-.009
1095	28 SUC	35	4	0	7	-.007	-.005	.631	.006	.008		.07	-.022	-.007	.088	-.015	-.005	1318	1226	.631	.095	.017	.006	.115	.016	.008
1096	29 SUC	8	1	1	7	-.009	-.011	.056	-.003	.003		.064	-.029	-.009	.071	-.031	-.011	.202	.109	.056	.07	-.008	-.003	.105	.006	.003
1097	31 SUC	22	3	1	7	.004	-.003	.498	.021	-.005		.105	.013	.004	.093	-.009	-.003	1059	.967	.498	.135	.056	.021	.089	-.011	-.005
1098	32 SUC	38	4	0	7	-.005	-.011	.23	.019	-.011		.075	-.017	-.005	.07	-.033	-.011	.54	.447	.23	.128	.049	.019	.079	-.021	-.011
1099	33 SUC	29	3	0	7	-.004	-.009	.52	.005	.002		.079	-.013	-.004	.077	-.025	-.009	1103	1011	.52	.092	.014	.005	.103	.003	.002
1100	34 SUC	27	3	0	7	.004	-.009	.368	.027	-.002		.104	.012	.004	.075	-.027	-.009	.807	.714	.368	.149	.07	.027	.095	-.004	-.002
1101	35 SUC	22	3	0	7	-.006	-.008	.402	0	.005		.074	-.019	-.006	.08	-.023	-.008	.874	.782	.402	.077	-.001	0	.109	.01	.005
1102	36 SUC	18	2	0	7	-.005	-.012	.218	-.002	0		.078	-.015	-.005	.066	-.037	-.012	.516	.424	.218	.074	-.004	-.002	.1	0	0
1103	37 SUC	33	4	1	7	.001	-.004	.131	.029	.013		.095	.003	.001	.09	-.013	-.004	.347	.254	.131	.155	.076	.029	.124	.025	.013
1104	38 SUC	15	2	1	7	-.004	-.011	.279	-.001	.002		.079	-.013	-.004	.071	-.032	-.011	.634	.541	.279	.077	-.002	-.001	.103	.003	.002
1105	39 SUC	25	3	0	7	-.001	-.008	.211	.024	.011		.09	-.003	-.001	.079	-.024	-.008	.503	.41	.211	.141	.062	.024	.121	.021	.011
1106	40 SUC	33	4	0	7	-.006	-.01	.079	.002	-.008		.073	-.019	-.006	.074	-.028	-.01	.246	.153	.079	.083	.005	.002	.083	-.017	-.008
1107	41 SUC	16	2	1	7	0	-.009	.128	.018	-.005		.093	.001	0	.075	-.028	-.009	.341	.249	.128	.126	.048	.018	.09	-.009	-.005
1108	42 SUC	24	3	0	7	.017	.003	.282	.01	-.008		.139	.054	.017	.1	.008	.003	.618	.523	.282	.114	.029	.01	.086	-.015	-.008
1109	43 SUC	81	6	0	7	-.001	-.005	.317	.028	.002		.082	-.003	-.001	.079	-.014	-.005	.682	.587	.317	.165	.08	.028	.105	.004	.002
1110	44 SUC	40	4	1	7	.002	-.007	.601	.004	.001		.091	.006	.002	.073	-.02	-.007	1208	1113	.601	.098	.013	.004	.104	.003	.001
1111	45 SUC	9	1	1	7	.014	.004	.13	.013	.012		.129	.044	.014	.104	.012	.004	.337	.241	.13	.124	.039	.013	.124	.022	.012
1112	46 SUC	29	3	1	7	.002	-.005	.348	.013	.001		.092	.007	.002	.08	-.013	-.005	.739	.644	.348	.123	.038	.013	.103	.002	.001
1113	47 SUC	8	1	0	7	.009	-.006	.176	0	-.007		.113	.028	.009	.075	-.017	-.006	.421	.325	.176	.084	-.001	0	.089	-.013	-.007
1114	48 SUC	5	0	1	7	.006	0	.237	.013	-.005		.103	.018	.006	.093	.001	0	.535	.439	.237	.124	.039	.013	.092	-.009	-.005
1115	50 SUC	18	2	0	7	-.001	-.008	-.011	-.005	-.006		.082	-.003	-.001	.07	-.022	-.008	.075	-.02	-.011	.071	-.014	-.005	.09	-.012	-.006
1116	51 SUC	29	3	0	7	-.001	-.006	.647	.009	-.001		.082	-.003	-.001	.076	-.017	-.006	1294	1198	.647	.111	.026	.009	.101	-.001	-.001
1117	52 SUC	11	2	1	7	.005	-.007	.061	0	.009		.101	.016	.005	.073	-.019	-.007	.208	.113	.061	.085	0	0	.118	.017	.009
1118	53 SUC	41	5	0	7	-.004	-.007	.237	.016	-.007		.071	-.014	-.004	.072	-.021	-.007	.535	.439	.237	.13	.045	.016	.088	-.013	-.007
1119	54 SUC	27	3	1	7	-.002	-.009	.667	0	-.012		.079	-.006	-.002	.068	-.025	-.009	1331	1236	.667	.084	-.001	0	.079	-.022	-.012
1120	55 SUC	43	5	0	7	.001	-.004	.346	.01	.003		.087	.002	.001	.081	-.011	-.004	.736	.64	.346	.114	.029	.01	.108	.006	.003
1121	56 SUC	18	2	0	7	.008	-.006	.212	.003	0		.111	.026	.008	.074	-.018	-.006	.488	.393	.212	.093	.008	.003	.102	.001	0
1122	57 SUC	23	3	1	7	-.003	-.008	.274	.012	.008		.074	-.011	-.003	.07	-.023	-.008	.602	.507	.274	.118	.033	.012	.116	.014	.008
1123	58 SUC	48	5	0	7	.009	-.002	.272	.032	-.006		.114	.029	.009	.088	-.004	-.002	.599	.504	.272	.178	.093	.032	.09	-.012	-.006
1124	59 SUC	58	6	0	7	-.002	-.002	.386	.012	.002		.08	-.005	-.002	.087	-.006	-.002	.81	.715	.386	.118	.033	.012	.105	.004	.002
1125	60 SUC	8	1	1	7	-.004	-.009	.105	-.002	-.004		.072	-.013	-.004	.068	-.024	-.009	.289	.194	.105	.079	-.006	-.002	.094	-.008	-.004
1126	61 SUC	16	2	1	7	-.006	-.009	.018	-.005	-.001		.066	-.019	-.006	.066	-.026	-.009	.128	.033	.018	.07	-.015	-.005	.1	-.002	-.001
1127	64 SUC	11	2	1	7	.016	-.007	.385	.001	-.012		.137	.052	.016	.073	-.019	-.007	.809	.713	.385	.087	.002	.001	.08	-.021	-.012
1128	65 SUC	19	2	1	7	.005	-.006	.691	.026	.022		.1	.015	.005	.075	-.018	-.006	1375	1279	.691	.16	.075	.026	.142	.04	.022
1129	66 SUC	27	3	1	7	.004	-.003	.28	.025	-.002		.096	.011	.004	.084	-.009	-.003	.614	.519	.28	.156	.071	.025	.099	-.003	-.002
1130	68 SUC	10	1	1	7	-.005	-.011	.057	-.004	-.012		.068	-.017	-.005	.061	-.032	-.011	.201	.106	.057	.073	-.012	-.004	.079	-.022	-.012
1131	69 SUC	10	1	0	7	-.001	-.009	.021	-.004	-.004		.081	-.004	-.001	.067	-.025	-.009	.135	.04	.021	.073	-.012	-.004	.094	-.007	-.004
1132	70 SUC	12	2	1	7	-.002	-.008	.105	.012	-.011		.079	-.006	-.002	.069	-.023	-.008	.289	.194	.105	.118	.033	.012	.082	-.02	-.011
1133	71 SUC	10	1	0	7	-.003	-.008	.306	.004	-.002		.077	-.008	-.003	.069	-.023	-.008	.663	.567	.306	.098	.013	.004	.097	-.004	-.002
1134	73 SUC	14	2	1	7	-.004	-.009	.282	.008	-.007		.074	-.011	-.004	.068	-.025	-.009	.618	.522	.282	.108	.023	.008	.089	-.012	-.007
1135	74 SUC	14	2	0	7	-.005	-.006	.051	.004	-.007		.07	-.015	-.005	.076	-.017	-.006	.19	.094	.051	.098	.013	.004	.089	-.012	-.007
1136	75 SUC	11	2	0	7	-.005	-.008	.107	-.004	-.007		.069	-.016	-.005	.069	-.024	-.008	.294	.199	.107	.072	-.013	-.004	.089	-.013	-.007
1137	76 SUC	9	1	0	7	-.005	-.01	.134	-.004	.011		.071	-.014	-.005	.065	-.028	-.01	.343	.247	.134	.072	-.013	-.004	.122	.02	.011
1138	77 SUC	37	4	1	7	.002	-.011	.619	.022	-.011		.093	.008	.002	.06	-.033	-.011	1242	1146	.619	.149	.064	.022	.081	-.021	-.011
1139	78 SUC	14	2	1	7	0	.005	.15	.025	-.009		.084	-.001	0	.106	.013	.005	.373	.278	.15	.158	.073	.025	.085	-.016	-.009
1140	79 SUC	7	1	1	7	-.001	-.008	.446	-.004	-.015		.082	-.003	-.001	.069	-.024	-.008	.921	.826	.446	.074	-.011	-.004	.074	-.027	-.015
1141	80 SUC	9	1	1	7	-.003	-.009	.351	-.004	-.007		.076	-.009	-.003	.068	-.025	-.009	.745	.65	.351	.074	-.011	-.004	.088	-.013	-.007
1142	81 SUC	5	0	0	7	-.004	-.008	.029	-.001	-.005		.071	-.014	-.004	.07	-.022	-.008	.149	.053	.029	.083	-.002	-.001	.093	-.008	-.005
1143	82 SUC	12	2	0	7	-.001	-.009	.256	.002	.007		.082	-.003	-.001	.067	-.026	-.009	.57	.475	.256	.09	.005	.002	.114	.012	.007
1144	84 SUC	17	2	0	7	.001	-.007	.402	.004	0		.087	.002	.001	.072	-.021	-.007	.839	.744	.402	.097	.012	.004	.102	0	0
1145	85 SUC	20	2	1	7	-.003	-.009	.212	-.004	-.006		.076	-.009	-.003	.067	-.026	-.009	.489	.393	.212	.074	-.011	-.004	.091	-.01	-.006
1146	88 SUC	30	3	1	7	.022	.016	.179	.004	-.011		.156	.071	.022	.139	.047	.016	.428	.332	.179	.095	.01	.004	.081	-.02	-.011
1147	89 SUC	28	3	1	7	.003	-.005	.249	.054	-.005		.096	.011	.003	.08	-.013	-.005	.557	.461	.249	.242	.157	.054	.092	-.01	-.005
1148	90 SUC	8	1	0	7	-.002	-.004	.083	.015	.001		.076	-.005	-.002	.09	-.012	-.004	.261	.159	.083	.144	.043	.015	.105	.001	.001
1149	91 SUC	5	0	0	7	.002	-.008	.205	-.008	.007		.087	.006	.002	.08	-.022	-.008	.497	.395	.205	.077	-.024	-.008	.117	.013	.007
1150	92 SUC	45	5	1	7	.002	.005	.229	.011	.009		.088	.006	.002	.115	.013	.005	.543	.441	.229	.133	.032	.011	.121	.017	.009
1151	93 SUC	21	3	0	7	.002	-.007	.033	-.002	.008		.086	.005	.002	.083	-.019	-.007	.166	.064	.033	.095	-.006	-.002	.118	.014	.008
1152	94 SUC	47	5	0	7	.007	-.007	.103	.007	.001		.103	.021	.007	.08	-.021	-.007	.3	.198	.103	.121	.02	.007	.106	.001	.001
1153	95 SUC	23	3	1	7	.005	-.007	.71	.013	.003		.096	.015	.005	.082	-.019	-.007	1468	1366	.71	.139	.038	.013	.11	.005	.003
1154	96 SUC	29	3	0	7	.004	-.006	.301	.011	-.003		.095	.013	.004	.085	-.016	-.006	.682	.58	.301	.134	.033	.011	.099	-.005	-.003
1155	97 SUC	5	0	0	7	.005	-.002	.155	.006	.017		.096	.015	.005	.096	-.005	-.002	.4	.298	.155	.119	.018	.006	.136	.031	.017
1156	100 SUC	19	2	0	7	-.001	-.009	.205	-.002	-.001		.078	-.004	-.001	.077	-.024	-.009	.497	.395	.205	.095	-.006	-.002	.102	-.003	-.001
1157	101 SUC	31	4	0	7	.004	0	.441	.039	.031		.092	.011	.004	.1	-.001	0	.95	.848	.441	.214	.113	.039	.161	.056	.031
1158	102 SUC	27	3	1	7	.001	-.009	.455	.009	.015		.085	.004	.001	.077	-.024	-.009	.977	.875	.455	.128	.027	.009	.132	.028	.015
1159	103 SUC	14	2	1	7	-.001	-.011	.316	.006	-.002		.079	-.002	-.001	.07	-.031	-.011	.711	.609	.316	.118	.017	.006	.101	-.003	-.002
1160	104 SUC	10	1	1	7	0	-.01	.038	.01	-.006		.082	0	0	.074	-.028	-.01	.174	.072	.038	.131	.03	.01	.094	-.01	-.006
1161	105 SUC	8	1	1	7	-.001	-.009	.106	.004	.081		.078	-.004	-.001	.076	-.026	-.009	.305	.203	.106	.112	.011	.004	.251	.147	.081
1162	106 SUC	4	0	1	7	.002	-.008	.027	.016	-.007		.088	.007	.002	.078	-.023	-.008	.154	.052	.027	.147	.046	.016	.092	-.012	-.007
1163	107 SUC	57	6	0	7	.001	-.01	.353	-.003	.006		.084	.003	.001	.073	-.028	-.01	.781	.679	.353	.092	-.009	-.003	.115	.011	.006
1164	108 SUC	13	2	0	7	.001	-.005	.069	.016	.001		.084	.002	.001	.086	-.015	-.005	.235	.133	.069	.148	.047	.016	.106	.002	.001
1165	109 SUC	36	4	1	7	.006	-.005	.393	-.003	.002		.098	.017	.006	.088	-.013	-.005	.858	.756	.393	.091	-.01	-.003	.108	.004	.002
1166	110 SUC	18	2	1	7	-.004	-.012	.276	-.008	-.008		.069	-.013	-.004	.068	-.034	-.012	.632	.53	.276	.079	-.022	-.008	.089	-.015	-.008
1167	111 SUC	17	2	1	7	-.001	-.009	.274	0	-.003		.077	-.004	-.001	.077	-.025	-.009	.629	.527	.274	.1	-.001	0	.099	-.006	-.003
1168	112 SUC	46	5	0	7	-.002	-.013	.278	.021	-.006		.074	-.007	-.002	.066	-.036	-.013	.636	.534	.278	.161	.06	.021	.094	-.011	-.006
1169	113 SUC	14	2	1	7	-.002	-.006	.031	.001	.009		.076	-.005	-.002	.084	-.017	-.006	.162	.06	.031	.105	.004	.001	.12	.016	.009
1170	114 SUC	12	2	1	7	.018	.006	.045	.018	-.006		.135	.054	.018	.118	.016	.006	.189	.087	.045	.152	.051	.018	.093	-.011	-.006
1171	115 SUC	25	3	1	7	0	-.008	.431	-.004	-.003		.082	0	0	.078	-.024	-.008	.931	.829	.431	.09	-.011	-.004	.099	-.005	-.003
1172	116 SUC	19	2	1	7	0	-.012	.163	0	-.002		.082	0	0	.066	-.035	-.012	.415	.313	.163	.102	.001	0	.101	-.004	-.002
1173	117 SUC	23	3	0	7	.007	-.007	.167	.013	.007		.102	.02	.007	.08	-.021	-.007	.424	.322	.167	.139	.038	.013	.116	.012	.007
1174	118 SUC	19	2	1	7	-.003	-.012	.306	.037	-.001		.072	-.009	-.003	.069	-.033	-.012	.69	.588	.306	.209	.108	.037	.103	-.002	-.001
1175	119 SUC	20	2	1	7	-.003	-.011	.447	.006	-.006		.072	-.01	-.003	.071	-.031	-.011	.962	.86	.447	.117	.016	.006	.094	-.011	-.006
1176	120 SUC	28	3	0	7	-.002	-.011	.147	0	-.006		.075	-.007	-.002	.07	-.031	-.011	.385	.283	.147	.1	-.001	0	.093	-.011	-.006
1177	121 SUC	21	3	1	7	.001	-.01	.29	.001	-.001		.083	.002	.001	.072	-.03	-.01	.66	.558	.29	.104	.003	.001	.103	-.001	-.001
1178	122 SUC	39	4	0	7	-.002	-.01	.76	.023	.002		.074	-.007	-.002	.072	-.029	-.01	1564	1462	.76	.168	.067	.023	.109	.004	.002
1179	123 SUC	29	3	1	7	.01	.003	.44	-.01	.002		.112	.03	.01	.109	.008	.003	.948	.846	.44	.073	-.028	-.01	.108	.004	.002
1180	124 SUC	42	5	1	7	.008	-.008	.293	.001	.005		.107	.025	.008	.08	-.022	-.008	.666	.564	.293	.105	.004	.001	.114	.01	.005
1181	125 SUC	8	1	1	7	.015	-.008	.032	-.002	-.001		.128	.046	.015	.079	-.023	-.008	.164	.062	.032	.094	-.007	-.002	.102	-.002	-.001
1182	126 SUC	58	6	1	7	.003	-.002	.696	.002	.01		.089	.008	.003	.096	-.006	-.002	1441	1339	.696	.106	.005	.002	.123	.019	.01
1183	127 SUC	33	4	0	7	0	-.005	.615	.021	.009		.082	.001	0	.088	-.013	-.005	1286	1184	.615	.163	.062	.021	.12	.016	.009
1184	128 SUC	15	2	0	7	-.001	-.007	.12	-.004	.002		.077	-.004	-.001	.082	-.02	-.007	.333	.231	.12	.089	-.012	-.004	.109	.004	.002
1185	129 SUC	35	4	0	7	-.003	-.011	.209	-.004	-.002		.073	-.009	-.003	.071	-.031	-.011	.504	.402	.209	.089	-.012	-.004	.1	-.004	-.002
1186	130 SUC	29	3	1	7	-.001	-.009	.31	-.007	-.004		.077	-.004	-.001	.076	-.025	-.009	.699	.597	.31	.079	-.022	-.007	.097	-.008	-.004
1187	131 SUC	50	5	1	7	.012	-.006	.521	.028	-.02		.119	.037	.012	.085	-.017	-.006	1105	1003	.521	.183	.082	.028	.097	-.04	-.02
1188	132 SUC	27	3	1	7	0	-.005	.153	.027	.073		.074	-.001	0	.075	-.014	-.005	.378	.292	.153	.156	.077	.027	.27	.157	.073
1189	133 SUC	8	1	1	7	.001	-.004	.491	.049	.023		.077	.002	.001	.078	-.011	-.004	1025	.939	.491	.219	.14	.049	.163	.05	.023
1190	134 SUC	11	2	0	7	0	-.006	.09	.001	.011		.075	.001	0	.071	-.017	-.006	.257	.171	.09	.082	.003	.001	.137	.024	.011
1191	135 SUC	36	4	1	7	0	-.004	.573	.004	.001		.075	.001	0	.078	-.011	-.004	1181	1095	.573	.092	.013	.004	.114	.001	.001
1192	136 SUC	10	1	0	7	0	-.005	.037	.002	.008		.075	0	0	.076	-.013	-.005	.156	.07	.037	.085	.006	.002	.13	.017	.008
1193	137 SUC	9	1	1	7	.004	-.001	.106	.002	.009		.087	.013	.004	.086	-.003	-.001	.288	.202	.106	.084	.005	.002	.132	.019	.009
1194	139 SUC	22	3	0	7	.006	.008	.632	.013	.018		.092	.018	.006	.109	.021	.008	1294	1208	.632	.117	.038	.013	.152	.039	.018
1195	140 SUC	36	4	0	7	.003	-.004	.271	.023	-.009		.084	.009	.003	.077	-.012	-.004	.605	.519	.271	.144	.065	.023	.119	-.019	-.009
1196	141 SUC	15	2	0	7	-.003	-.005	.048	.002	.021		.065	-.01	-.003	.073	-.015	-.005	.177	.091	.048	.085	.006	.002	.158	.045	.021
1197	142 SUC	13	2	0	7	-.002	-.006	.089	.006	-.003		.067	-.007	-.002	.072	-.016	-.006	.256	.161	.089	.095	.016	.006	.107	-.006	-.003
1198	143 SUC	10	1	0	7	-.004	-.007	.093	.003	-.007		.062	-.012	-.004	.07	-.018	-.007	.263	.177	.093	.088	.009	.003	.097	-.016	-.007
1199	144 SUC	16	2	0	7	0	-.003	.251	.011	.008		.075	0	0	.079	-.009	-.003	.566	.48	.251	.11	.031	.011	.131	.018	.008
1200	145 SUC	24	3	0	7	-.003	-.007	.305	.01	-.01		.065	-.009	-.003	.069	-.019	-.007	.669	.583	.305	.107	.028	.01	.092	-.021	-.01
1201	146 SUC	20	2	0	7	-.002	-.006	.341	.016	-.005		.069	-.006	-.002	.073	-.016	-.006	.739	.653	.341	.125	.046	.016	.103	-.01	-.005
1202	147 SUC	16	2	1	7	0	-.002	.178	-.001	.001		.074	0	0	.082	-.007	-.002	.427	.341	.178	.075	-.004	-.001	.116	.003	.001
1203	148 SUC	37	4	0	7	.001	.004	.561	.023	.025		.078	.004	.001	.1	.012	.004	1159	1073	.561	.145	.066	.023	.167	.054	.025
1204	149 SUC	40	4	0	7	-.001	-.007	.338	.023	.029		.072	-.002	-.001	.07	-.019	-.007	.733	.647	.338	.145	.066	.023	.175	.062	.029
1205	150 SUC	13	2	0	7	.003	0	.125	.018	.021		.082	.008	.003	.089	0	0	.324	.238	.125	.131	.052	.018	.158	.045	.021
1206	151 SUC	40	4	1	7	-.002	-.005	.402	.01	.003		.07	-.005	-.002	.073	-.015	-.005	.854	.768	.402	.109	.03	.01	.12	.007	.003
1207	152 SUC	12	2	1	7	-.004	-.009	.058	-.001	-.013		.061	-.013	-.004	.063	-.026	-.009	.196	.11	.058	.077	-.002	-.001	.086	-.027	-.013
1208	153 SUC	10	1	1	7	-.004	-.007	.257	.031	0		.061	-.013	-.004	.068	-.021	-.007	.578	.492	.257	.167	.088	.031	.113	0	0
1209	154 SUC	8	1	0	7	-.004	-.008	.164	-.003	-.01		.064	-.011	-.004	.065	-.023	-.008	.399	.313	.164	.071	-.008	-.003	.093	-.02	-.01
1210	155 SUC	21	3	0	7	.004	0	.336	.004	.009		.087	.013	.004	.089	.001	0	.728	.642	.336	.091	.012	.004	.133	.02	.009
1211	156 SUC	12	2	1	7	-.001	-.004	.078	.03	0		.072	-.003	-.001	.077	-.012	-.004	.234	.148	.078	.164	.085	.03	.114	.001	0
1212	157 SUC	59	6	1	7	-.003	-.008	.611	.009	.003		.066	-.009	-.003	.066	-.022	-.008	1254	1168	.611	.105	.026	.009	.12	.007	.003
1213	158 SUC	26	3	1	7	.045	.03	.305	.001	-.002		.21	.136	.045	.171	.082	.03	.67	.584	.305	.081	.002	.001	.109	-.004	-.002
1214	159 SUC	55	6	1	7	-.005	-.011	.275	-.003	-.011		.059	-.015	-.005	.059	-.029	-.011	.612	.526	.275	.069	-.01	-.003	.089	-.024	-.011
1215	160 SUC	34	4	0	7	.001	-.004	.248	.014	-.001		.077	.003	.001	.078	-.011	-.004	.56	.474	.248	.118	.039	.014	.111	-.002	-.001
1216	161 SUC	16	2	0	7	-.004	-.007	.164	0	.002		.061	-.013	-.004	.068	-.02	-.007	.399	.313	.164	.08	.001	0	.118	.005	.002
1217	162 SUC	23	3	0	7	-.005	-.01	.574	.008	-.009		.059	-.015	-.005	.06	-.028	-.01	1184	1098	.574	.103	.024	.008	.093	-.02	-.009
1218	163 SUC	45	5	0	7	-.002	-.006	.312	-.002	-.005		.067	-.007	-.002	.071	-.018	-.006	.682	.596	.312	.073	-.006	-.002	.103	-.01	-.005
1219	164 SUC	53	6	0	7	-.004	-.005	.896	.004	.003		.064	-.011	-.004	.074	-.014	-.005	1.8	1714	.896	.09	.011	.004	.119	.006	.003
1220	165 SUC	33	4	0	7	-.001	-.005	.246	.004	.006		.073	-.002	-.001	.075	-.014	-.005	.557	.471	.246	.092	.013	.004	.126	.013	.006
1221	166 SUC	28	3	1	7	-.001	-.006	.186	.028	-.003		.072	-.002	-.001	.072	-.016	-.006	.441	.355	.186	.161	.082	.028	.106	-.007	-.003
1222	167 SUC	10	1	1	7	.005	.002	.112	.016	.017		.09	.015	.005	.093	.004	.002	.3	.214	.112	.124	.045	.016	.149	.036	.017
1223	168 SUC	27	3	1	7	-.001	-.003	.454	.015	.001		.072	-.002	-.001	.081	-.008	-.003	.955	.869	.454	.122	.043	.015	.115	.002	.001
1224	169 SUC	18	2	1	7	-.003	-.006	.14	.046	-.008		.066	-.009	-.003	.073	-.016	-.006	.354	.268	.14	.212	.133	.046	.096	-.017	-.008
1225	170 SUC	15	2	1	7	-.002	-.003	.257	.005	-.005		.069	-.005	-.002	.08	-.008	-.003	.578	.492	.257	.092	.013	.005	.102	-.011	-.005
1226	171 SUC	14	2	1	7	-.001	-.006	.109	.012	-.01		.071	-.004	-.001	.072	-.017	-.006	.294	.208	.109	.113	.034	.012	.092	-.021	-.01
1227	172 SUC	47	5	0	7	-.001	0	.4	.009	.01		.073	-.002	-.001	.089	.001	0	.851	.765	.4	.106	.027	.009	.135	.022	.01
1228	173 SUC	53	6	0	7	.142	.111	.413	.047	.011		.499	.427	.142	.419	.308	.111	.851	.748	.413	.222	.131	.047	.111	.021	.011
1229	174 SUC	50	5	0	7	.001	-.008	.654	.022	.009		.074	.002	.001	.09	-.021	-.008	1286	1183	.654	.153	.062	.022	.108	.018	.009
1230	175 SUC	12	2	0	7	-.001	-.013	.082	0	-.003		.069	-.003	-.001	.075	-.036	-.013	.251	.148	.082	.092	.001	0	.084	-.006	-.003
1231	176 SUC	8	1	1	7	0	-.011	.108	.004	.003		.072	0	0	.081	-.03	-.011	.298	.195	.108	.101	.01	.004	.095	.005	.003
1232	177 SUC	59	6	0	7	.003	-.009	.273	.03	-.001		.08	.008	.003	.086	-.025	-.009	.598	.495	.273	.175	.084	.03	.087	-.003	-.001
1233	178 SUC	58	6	1	7	.005	-.007	.327	.017	.005		.086	.014	.005	.091	-.02	-.007	.695	.592	.327	.139	.048	.017	.099	.009	.005
1234	179 SUC	10	1	1	7	.003	-.009	.023	.008	.002		.081	.009	.003	.086	-.025	-.009	.144	.041	.023	.113	.022	.008	.095	.005	.002
1235	180 SUC	8	1	0	7	-.001	-.016	.043	.004	.015		.069	-.003	-.001	.068	-.043	-.016	.18	.077	.043	.103	.012	.004	.119	.029	.015
1236	181 SUC	29	3	1	7	-.002	-.013	.495	.01	.008		.066	-.006	-.002	.075	-.036	-.013	.999	.896	.495	.12	.029	.01	.105	.015	.008
1237	182 SUC	14	2	1	7	0	-.014	.245	.013	.008		.071	-.001	0	.072	-.039	-.014	.546	.443	.245	.129	.038	.013	.105	.015	.008
1238	183 SUC	19	2	0	7	.009	-.006	.107	.007	.02		.099	.027	.009	.096	-.015	-.006	.296	.193	.107	.111	.02	.007	.13	.04	.02
1239	184 SUC	9	1	1	7	.018	-.007	.036	-.006	.002		.126	.054	.018	.091	-.02	-.007	.169	.066	.036	.074	-.017	-.006	.094	.004	.002
1240	185 SUC	10	1	0	7	-.002	-.014	.036	.02	-.007		.066	-.006	-.002	.073	-.038	-.014	.168	.065	.036	.146	.055	.02	.076	-.014	-.007
1241	186 SUC	63	6	0	7	-.001	-.012	.422	.006	-.001		.068	-.004	-.001	.077	-.034	-.012	.866	.763	.422	.109	.018	.006	.087	-.003	-.001
1242	187 SUC	22	3	1	7	.003	-.006	.055	-.003	-.003		.08	.008	.003	.094	-.017	-.006	.202	.099	.055	.083	-.008	-.003	.084	-.006	-.003
1243	188 SUC	5	0	1	7	-.002	-.018	.22	-.005	-.006		.067	-.005	-.002	.061	-.05	-.018	.502	.399	.22	.076	-.015	-.005	.079	-.011	-.006
1244	190 SUC	37	4	1	7	-.002	-.013	.303	-.002	0		.067	-.005	-.002	.074	-.037	-.013	.651	.548	.303	.085	-.006	-.002	.09	0	0
1245	191 SUC	11	2	0	7	-.004	-.017	.079	.003	.005		.061	-.011	-.004	.065	-.046	-.017	.246	.143	.079	.098	.007	.003	.1	.01	.005
1246	192 SUC	21	3	1	7	0	-.014	.331	.002	.007		.072	0	0	.072	-.039	-.014	.702	.599	.331	.097	.006	.002	.103	.013	.007
1247	193 SUC	7	1	0	7	0	-.015	.188	-.002	0		.071	-.001	0	.07	-.041	-.015	.444	.341	.188	.085	-.006	-.002	.089	-.001	0
1248	195 SUC	6	1	0	7	.012	-.003	.019	.012	.006		.109	.037	.012	.103	-.008	-.003	.137	.034	.019	.124	.033	.012	.102	.012	.006
1249	196 SUC	5	0	1	7	-.003	-.015	.005	-.003	-.011		.064	-.008	-.003	.071	-.04	-.015	.111	.008	.005	.082	-.009	-.003	.069	-.021	-.011
1250	197 SUC	58	6	1	7	.004	-.008	.289	.016	-.002		.083	.011	.004	.089	-.022	-.008	.626	.523	.289	.136	.045	.016	.086	-.004	-.002
1251	198 SUC	26	3	1	7	-.003	-.012	.423	-.003	.015		.064	-.008	-.003	.077	-.034	-.012	.868	.765	.423	.083	-.008	-.003	.119	.029	.015
1252	199 SUC	9	1	1	7	-.003	-.016	.333	-.007	-.004		.063	-.009	-.003	.066	-.045	-.016	.705	.602	.333	.071	-.02	-.007	.083	-.007	-.004
1253	200 SUC	38	4	0	7	-.002	-.016	.374	-.001	.006		.066	-.006	-.002	.068	-.043	-.016	.78	.677	.374	.088	-.003	-.001	.102	.012	.006
1254	201 SUC	11	2	0	7	-.002	-.017	.055	-.006	.007		.065	-.007	-.002	.064	-.047	-.017	.202	.099	.055	.075	-.016	-.006	.103	.013	.007
1255	202 SUC	41	5	1	7	-.002	-.012	.543	.006	.021		.065	-.007	-.002	.078	-.033	-.012	1085	.982	.543	.107	.016	.006	.132	.042	.021
1256	203 SUC	27	3	1	7	-.001	-.015	.159	.001	.002		.07	-.002	-.001	.07	-.041	-.015	.391	.288	.159	.095	.004	.001	.094	.004	.002
1257	204 SUC	13	2	1	7	-.003	-.018	.022	.001	-.007		.063	-.009	-.003	.062	-.049	-.018	.143	.04	.022	.093	.002	.001	.076	-.014	-.007
1258	205 SUC	37	4	0	7	.002	-.013	.148	.018	.009		.077	.005	.002	.076	-.035	-.013	.371	.268	.148	.142	.051	.018	.107	.017	.009
1259	206 SUC	77	6	1	7	0	-.017	.32	-.004	-.001		.073	.001	0	.064	-.047	-.017	.682	.579	.32	.079	-.012	-.004	.088	-.002	-.001
1260	207 SUC	10	1	0	7	0	-.016	.069	.018	-.005		.071	-.001	0	.067	-.044	-.016	.228	.125	.069	.14	.049	.018	.081	-.009	-.005
1261	208 SUC	7	1	1	7	-.002	-.016	.023	-.002	.002		.066	-.006	-.002	.067	-.044	-.016	.145	.042	.023	.086	-.005	-.002	.094	.004	.002
1262	209 SUC	5	0	0	7	-.002	-.016	.004	-.007	.003		.065	-.007	-.002	.067	-.044	-.016	.11	.007	.004	.071	-.02	-.007	.095	.005	.003
1263	210 SUC	3	0	0	7	-.002	-.014	.03	-.005	.009		.067	-.005	-.002	.073	-.038	-.014	.157	.054	.03	.078	-.013	-.005	.107	.017	.009
1264	211 SUC	8	1	1	7	-.001	-.014	.001	.006	.002		.068	-.004	-.001	.074	-.037	-.014	.104	.001	.001	.109	.018	.006	.094	.004	.002
1265	212 SUC	11	2	0	7	0	-.015	-.002	.007	-.005		.071	-.001	0	.07	-.041	-.015	.099	-.004	-.002	.11	.019	.007	.08	-.01	-.005
1266	213 SUC	5	0	0	7	-.001	-.013	.075	-.002	-.004		.07	-.002	-.001	.075	-.036	-.013	.238	.135	.075	.086	-.005	-.002	.082	-.008	-.004
1267	215 SUC	13	2	0	7	0	-.014	.039	-.003	-.006		.073	.001	0	.072	-.039	-.014	.174	.071	.039	.082	-.009	-.003	.078	-.012	-.006
1268	216 SUC	15	2	0	7	.002	-.005	.092	-.004	-.007		.075	.005	.002	.079	-.014	-.005	.318	.214	.092	.089	-.01	-.004	.086	-.014	-.007
1269	217 SUC	35	4	1	7	.002	-.001	.408	.003	.003		.076	.006	.002	.09	-.002	-.001	1054	.95	.408	.107	.008	.003	.106	.006	.003
1270	218 SUC	17	2	1	7	.001	-.005	.552	-.003	-.006		.072	.002	.001	.078	-.014	-.005	1389	1284	.552	.092	-.007	-.003	.089	-.012	-.006
1271	219 SUC	10	1	0	7	.001	-.003	.009	.001	-.008		.072	.002	.001	.084	-.009	-.003	.126	.022	.009	.103	.004	.001	.085	-.015	-.008
1272	220 SUC	8	1	0	7	.001	-.004	.062	-.006	-.01		.072	.002	.001	.08	-.012	-.004	.249	.144	.062	.083	-.016	-.006	.08	-.02	-.01
1273	221 SUC	7	1	1	7	.001	-.005	.114	-.002	-.01		.073	.003	.001	.08	-.013	-.005	.369	.264	.114	.093	-.006	-.002	.081	-.019	-.01
1274	222 SUC	9	1	0	7	.004	-.001	.088	0	-.001		.081	.011	.004	.091	-.002	-.001	.309	.204	.088	.1	.001	0	.098	-.002	-.001
1275	223 SUC	11	2	1	7	.002	0	.085	0	-.003		.077	.007	.002	.093	0	0	.302	.197	.085	.098	-.001	0	.094	-.007	-.003
1276	224 SUC	5	0	1	7	-.003	-.004	.021	.015	-.002		.061	-.009	-.003	.082	-.011	-.004	.154	.05	.021	.142	.043	.015	.096	-.005	-.002
1277	226 SUC	9	1	0	7	-.002	-.003	.196	-.001	.002		.064	-.006	-.002	.084	-.009	-.003	.561	.457	.196	.095	-.004	-.001	.105	.004	.002
1278	227 SUC	18	2	1	7	-.001	-.007	.121	-.003	-.007		.066	-.004	-.001	.072	-.021	-.007	.313	.219	.121	.092	-.007	-.003	.086	-.015	-.007
1279	228 SUC	37	4	1	7	.002	-.004	.261	.026	.012		.076	.006	.002	.08	-.012	-.004	.711	.606	.261	.173	.074	.026	.124	.024	.012
1280	229 SUC	13	2	1	7	-.002	-.009	.093	-.004	-.012		.064	-.006	-.002	.068	-.024	-.009	.32	.215	.093	.089	-.01	-.004	.076	-.024	-.012
1281	231 SUC	3	0	0	7	-.001	-.008	.04	-.001	-.015		.066	-.004	-.001	.071	-.022	-.008	.197	.093	.04	.097	-.002	-.001	.071	-.029	-.015
1282	232 SUC	31	4	1	7	-.001	-.008	.214	.017	-.013		.067	-.003	-.001	.071	-.021	-.008	.603	.498	.214	.147	.048	.017	.074	-.026	-.013
1283	233 SUC	23	3	1	7	.001	-.005	.106	-.004	-.007		.072	.002	.001	.079	-.014	-.005	.35	.246	.106	.087	-.012	-.004	.087	-.014	-.007
1284	234 SUC	30	3	0	7	0	-.008	.198	-.006	-.003		.069	-.001	0	.071	-.022	-.008	.565	.461	.198	.083	-.016	-.006	.094	-.006	-.003
1285	235 SUC	14	2	0	7	-.003	-.009	.25	-.004	-.002		.061	-.009	-.003	.067	-.026	-.009	.685	.581	.25	.088	-.011	-.004	.097	-.004	-.002
1286	236 SUC	26	3	0	7	-.001	.004	.291	.021	.016		.068	-.002	-.001	.104	.012	.004	.782	.677	.291	.159	.06	.021	.131	.031	.016
1287	237 SUC	9	1	1	7	0	-.007	.026	.017	-.001		.07	0	0	.073	-.019	-.007	.166	.061	.026	.147	.048	.017	.099	-.001	-.001
1288	238 SUC	5	0	1	7	-.005	-.011	.016	-.008	-.016		.054	-.016	-.005	.062	-.031	-.011	.141	.037	.016	.077	-.022	-.008	.069	-.031	-.016
1289	239 UC	4	0	0	7	-.002	-.008	.009	-.007	-.009		.063	-.007	-.002	.07	-.023	-.008	.126	.021	.009	.08	-.019	-.007	.082	-.018	-.009
1290	240 SUC	3	0	0	7	.002	-.008	.025	0	-.017		.077	.007	.002	.069	-.024	-.008	.162	.057	.025	.1	.001	0	.067	-.033	-.017
1291	241 SUC	2	0	1	7	-.003	-.008	-.001	-.012	-.014		.06	-.01	-.003	.07	-.022	-.008	.102	-.003	-.001	.066	-.033	-.012	.074	-.027	-.014
1292	242 SUC	25	3	0	7	-.004	-.007	.433	-.002	-.005		.059	-.011	-.004	.072	-.02	-.007	1111	1007	.433	.093	-.006	-.002	.09	-.01	-.005
1293	243 SUC	27	3	0	7	.038	.04	.198	.015	.013		.186	.116	.038	.204	.112	.04	.565	.461	.198	.142	.043	.015	.126	.025	.013
1294	244 SUC	9	1	1	7	-.004	-.01	.133	-.01	-.007		.057	-.013	-.004	.065	-.027	-.01	.414	.31	.133	.07	-.029	-.01	.087	-.013	-.007
1295	245 SUC	45	5	1	7	-.004	-.007	.404	.017	.003		.059	-.011	-.004	.072	-.021	-.007	1043	.939	.404	.146	.047	.017	.106	.005	.003
1296	246 SUC	22	3	1	7	-.001	-.007	.325	.022	-.003		.066	-.004	-.001	.072	-.021	-.007	.86	.756	.325	.163	.064	.022	.095	-.005	-.003
1297	247 UC	59	6	0	7	.018	.015	.44	.016	-.001		.125	.055	.018	.134	.042	.015	1127	1022	.44	.143	.044	.016	.099	-.001	-.001
1298	248 SUC	15	2	1	7	-.003	-.009	.42	.001	-.012		.062	-.008	-.003	.066	-.026	-.009	1082	.977	.42	.101	.002	.001	.078	-.023	-.012
1299	249 SUC	34	4	1	7	-.002	-.007	.165	-.002	-.004		.064	-.006	-.002	.074	-.018	-.007	.488	.383	.165	.093	-.006	-.002	.092	-.008	-.004
1300	250 SUC	7	1	1	7	-.002	-.006	.062	.014	-.01		.064	-.006	-.002	.076	-.017	-.006	.25	.145	.062	.138	.039	.014	.08	-.02	-.01
1301	251 SUC	5	0	1	7	0	-.008	.039	-.008	.004		.069	-.001	0	.07	-.022	-.008	.196	.091	.039	.078	-.021	-.008	.108	.007	.004
1302	252 SUC	1.67	0	0	7	.002	0	.002	-.002	-.001		.077	.007	.002	.093	0	0	.11	.006	.002	.093	-.006	-.002	.099	-.001	-.001
1303	253 SUC	2	0	0	7	-.001	-.007	.125	-.006	-.01		.068	-.002	-.001	.074	-.019	-.007	.394	.29	.125	.082	-.017	-.006	.081	-.02	-.01
1304	254 SUC	10	1	1	7	0	-.008	.166	.014	-.005		.069	-.001	0	.07	-.022	-.008	.49	.385	.166	.138	.039	.014	.09	-.01	-.005
1305	255 SUC	8	1	1	7	-.001	-.006	.105	-.007	-.008		.068	-.002	-.001	.076	-.017	-.006	.348	.244	.105	.08	-.019	-.007	.084	-.017	-.008
1306	256 SUC	41	5	0	7	0	-.007	.248	.028	-.01		.07	0	0	.072	-.021	-.007	.681	.577	.248	.178	.079	.028	.08	-.02	-.01
1307	257 SUC	33	4	1	7	0	-.004	.669	.003	-.002		.07	0	0	.081	-.011	-.004	1.66	1555	.669	.107	.008	.003	.096	-.004	-.002
1308	258 SUC	6	1	1	7	.003	.001	.071	.031	-.004		.083	.009	.003	.084	.002	.001	.281	.172	.071	.166	.082	.031	.089	-.008	-.004
1309	259 SUC	12	2	0	7	.001	-.003	.278	-.001	0		.076	.002	.001	.074	-.008	-.003	.78	.671	.278	.081	-.003	-.001	.097	0	0
1310	260 SUC	26	3	0	7	.003	-.001	.166	.032	.013		.083	.009	.003	.079	-.003	-.001	.509	.4	.166	.168	.084	.032	.122	.025	.013
1311	261 SUC	32	4	0	7	.015	.017	.367	.004	.004		.118	.044	.015	.126	.044	.017	.994	.885	.367	.095	.011	.004	.104	.007	.004
1312	262 SUC	12	2	0	7	.005	.002	.101	.019	.002		.09	.016	.005	.086	.005	.002	.353	.244	.101	.135	.051	.019	.101	.004	.002
1313	263 SUC	68	6	0	7	.005	.002	.338	.005	.006		.089	.015	.005	.087	.005	.002	.924	.815	.338	.098	.014	.005	.108	.011	.006
1314	264 SUC	31	4	1	7	-.001	-.001	.292	-.003	-.008		.072	-.002	-.001	.078	-.004	-.001	.814	.705	.292	.076	-.008	-.003	.082	-.015	-.008
1315	265 SUC	20	2	1	7	.007	.007	.187	.006	.002		.095	.021	.007	.1	.019	.007	.561	.452	.187	.1	.016	.006	.1	.003	.002
1316	266 SUC	60	6	1	7	-.002	.001	.557	.021	-.007		.07	-.004	-.002	.084	.003	.001	1452	1343	.557	.139	.055	.021	.084	-.013	-.007
1317	267 SUC	28	3	1	7	-.001	0	.157	.036	.004		.072	-.002	-.001	.083	.001	0	.488	.379	.157	.179	.095	.036	.105	.008	.004
1318	268 SUC	38	4	0	7	.004	.004	.524	.018	.015		.085	.011	.004	.093	.011	.004	1374	1265	.524	.132	.048	.018	.125	.028	.015
1319	269 SUC	9	1	1	7	-.002	.001	.099	.005	0		.067	-.007	-.002	.083	.002	.001	.348	.239	.099	.097	.013	.005	.096	-.001	0
1320	270 SUC	7	1	1	7	-.002	-.005	.064	.001	-.009		.068	-.006	-.002	.069	-.012	-.005	.264	.155	.064	.087	.003	.001	.079	-.018	-.009
1321	271 SUC	35	4	1	7	-.002	-.003	.266	.02	-.007		.069	-.005	-.002	.074	-.008	-.003	.75	.641	.266	.136	.052	.02	.084	-.013	-.007
1322	272 SUC	6	1	1	7	-.007	-.004	.085	.011	-.004		.053	-.021	-.007	.07	-.012	-.004	.313	.204	.085	.113	.029	.011	.088	-.009	-.004
1323	273 SUC	6	1	0	7	-.003	-.002	-.002	.002	-.004		.067	-.007	-.003	.077	-.005	-.002	.104	-.005	-.002	.089	.005	.002	.089	-.008	-.004
1324	274 SUC	9	1	0	7	-.003	-.005	.013	.001	-.007		.066	-.008	-.003	.068	-.014	-.005	.14	.031	.013	.088	.004	.001	.084	-.013	-.007
1325	275 SUC	26	3	1	7	.009	.003	.473	-.003	0		.099	.025	.009	.091	.009	.003	1.25	1141	.473	.075	-.009	-.003	.097	0	0
1326	277 SUC	6	1	0	7	-.004	-.004	.039	-.002	-.004		.061	-.013	-.004	.072	-.01	-.004	.203	.094	.039	.078	-.006	-.002	.089	-.008	-.004
1327	278 SUC	8	1	0	7	-.003	-.005	.003	.002	.005		.064	-.01	-.003	.068	-.013	-.005	.117	.008	.003	.088	.004	.002	.106	.009	.005
1328	279 SUC	8	1	0	7	-.004	-.006	.019	-.002	-.011		.061	-.013	-.004	.067	-.015	-.006	.154	.045	.019	.079	-.005	-.002	.076	-.021	-.011
1329	280 SUC	9	1	0	7	-.004	-.004	.037	-.001	-.014		.063	-.011	-.004	.07	-.012	-.004	.199	.09	.037	.082	-.002	-.001	.069	-.028	-.014
1330	281 SUC	23	3	1	7	.003	0	.271	-.005	0		.083	.009	.003	.082	.001	0	.764	.655	.271	.071	-.013	-.005	.096	-.001	0
1331	51 HEMO					-.001	-.008	.16	.003	-.028
1332	52 HEMO					0	-.003	.351	.007	-.013
1333	53 HEMO					.022	.018	.205	.045	-.018
1334	54 HEMO					.001	-.005	.308	.016	-.025
1335	55 HEMO					.003	-.008	.313	.028	-.026
1336	56 HEMO					.001	-.008	.371	.025	-.018
1337	57 HEMO					-.002	-.004	.139	-.001	-.024
1338	58 HEMO					-.001	-.005	.485	.008	-.004
1339	59 HEMO					-.001	-.004	.352	.007	-.02
1340	60 HEMO					-.001	-.009	.101	-.002	-.029
1341	61 HEMO					.008	-.002	.224	.018	-.012
1342	62 HEMO					.002	-.003	.073	.009	-.014
1343	63 HEMO					0	-.004	.224	.029	-.021
1344	64 HEMO					-.001	-.007	.305	.019	-.022
1345	65 HEMO					0	-.002	.045	.018	-.027
1346	66 HEMO					.001	-.006	.26	.017	-.025
1347	67 HEMO					-.001	-.006	.191	.002	-.026
1348	68 HEMO					.001	-.009	.133	.013	-.03
1349	69 HEMO					-.001	-.007	.052	.001	-.029
1350	70 HEMO					-.002	-.007	.134	.004	-.026
1351	71 HEMO					-.002	-.007	.238	0	-.029
1352	72 HEMO					-.001	-.009	.118	.01	-.032
1353	73 HEMO					.002	0	.177	.002	-.014
1354	74 HEMO					.001	-.002	.282	.023	-.019
1355	75 HEMO					0	-.007	.093	.002	-.029
1356	76 HEMO					0	-.008	.164	.005	-.022
1357	77 HEMO					.001	-.007	.035	0	-.026
1358	78 HEMO					0	-.003	.169	.01	-.025
1359	79 HEMO					.004	0	.261	.013	-.021
1360	80 HEMO					.001	-.005	.068	.012	-.028
